# Supplementary material for: Integrative Molecular Characterization of Malignant Pleural Mesothelioma
Source: Oxford University Press journal article supplement (doi:10.1158/2159-8290.cd-18-0804), 2018-10-15
Supplement: 21598290cd180804-sup-205173_2_supp_5073241_pg14sl.docx [file 21598290cd180804-sup-205173_2_supp_5073241_pg14sl.docx]

**Supplementary Table 3: Karyotypes of 16 genome-wide LOH MPM cases from the BWH cohort.**

| Case | Sex | Age | Site | Histology | Karyotype |
| --- | --- | --- | --- | --- | --- |
| 1 | F | 40 | Pleural | epithelioid | **26**,X,+X,+5,+7 |
| 2 | M | 57 | Pleural | biphasic | **26**,X,+Y,+5,+del(7)(q22) |
| 3 | M | 25 | Pleural | biphasic | **26**,X,+5,+15,+20,+mar |
| 4 | F | 56 | Pleural | epithelioid | **28**,X,+X,+5,+7,+16,+20 |
| 5 | F | 48 | Pleural | epithelioid | **26**,X,+5,+7,+16 |
| 6 | F | 46 | Pleural | biphasic | **28**,X,+5,+7,+15,+16,+20 |
| 7 | M | 53 | Pleural | biphasic | **25**,X,+Y,+der(7),+i(8)(q11.2) |
| 8 | F | 36 | Pleural | epithelioid | **29**,X,+5,+6,+7,+11,+16,+20 |
| 9 | M | 55 | Pleural | epithelioid | **24**,X,+7,der(11)t(1;11)(q11;p15) |
| 10 | F | 63 | Pleural | epithelioid | **26**,X,+1,der(1;14)(q10;q10),+5,+7 |
| 11 | M | 78 | Pleural | epithelioid | **25**,X,+5,+7 |
| 12 | F | 46 | Pleural | epithelioid | **29**,X,+5,+6,+7,+11,+16,+20 |
| 13 | M | 69 | Pleural | epithelioid | **26**,XY,+5,+7,-15, der(15)t(1;15)(q12;p11.2)[15]/52,idemx2[5] |
| 14 | F | 30 | Pleural | epithelioid | **29**,X,+5,+6,+7,+11,+16,+20 |
| 15 | F | 59 | Pleural | biphasic | **26**,X,+7,del(7)(q32),i(8)(q10),+20,+21 |
| 16 | F | 67 | Pleural | biphasic | **27**,X,+5,+7,+20,add(21)(p11.2),add(22)(p11.1), +mar |
