# Supplementary material for: Integrative Molecular Characterization of Malignant Pleural Mesothelioma
Source: Oxford University Press journal article supplement (doi:10.1158/2159-8290.cd-18-0804), 2018-10-15
Supplement: 21598290cd180804-sup-205173_2_supp_5073242_pg14sl.xlsx [file 21598290cd180804-sup-205173_2_supp_5073242_pg14sl.xlsx]

## Sheet: 4A_Immune_signatures_Bindea
	aDC	Angiogenesis	APM1	APM2	B cells	CD8 T cells	CTLA4	Cytotoxic cells	DC	Eosinophils	iDC	Macrophages	Mast cells	Neutrophils	NK CD56bright cells	NK CD56dim cells	NK cells	PD1	pDC	PDL1	T cells	T helper cells	Tcm cells	Tem cells	Tfh cells	Tgd cells	Th1 cells	Th17 cells	Th2 cells	Treg cells
TCF3	-0.030814	-0.384283	-0.118297	-0.526408	-0.588535	-0.409872	-0.346695	-0.378321	-0.21035	-0.27539	-0.161898	-0.327367	-0.435943	-0.332687	-0.0189941	0.0479639	0.0824672	-0.0334751	-0.285747	0.133324	-0.357297	-0.0822518	-0.32337	-0.185937	-0.220379	-0.00846184	-0.376182	0.0451308	0.439972	-0.16334
MYB	-0.469464	-0.184438	-0.414611	-0.215678	-0.161183	-0.221475	-0.49007	-0.412829	-0.136262	0.254396	-0.380238	-0.310207	0.115832	-0.387313	-0.44892	-0.432123	-0.267983	-0.408024	-0.377277	-0.642339	-0.534852	-0.414658	0.127602	-0.165698	-0.185052	-0.230729	-0.370742	-0.128973	-0.396306	-0.479705
TFAP4	0.234316	-0.0255411	0.145745	0.356541	0.494041	0.323742	0.401054	0.302134	0.291391	0.117201	0.218649	0.128883	0.148058	0.13038	0.106979	-0.0387021	-0.241011	0.284227	0.0818037	-0.0265973	0.341385	0.136898	0.0102732	0.128576	0.195461	0.0334966	0.184496	-0.131438	-0.100023	0.342095
MEF2A	-0.139798	0.11374	0.038448	0.0231742	0.0503012	-0.0913589	0.126943	0.0539226	-0.238086	-0.166366	-0.139917	0.231689	-0.0560716	0.219842	0.0958548	0.308418	0.098601	-0.00943767	-0.087007	0.0823547	0.161982	0.182505	-0.278588	0.0200602	0.359611	0.0916378	-0.00612639	-0.0616607	0.255786	0.0289001
ELK1	0.0701642	-0.0155077	0.0472371	0.183823	0.263311	0.113054	-0.0596206	0.0971833	0.187258	0.2675	-0.036448	-0.0732897	0.3836	-0.0562386	-0.117606	-0.232468	-0.0539952	-0.150253	-0.00224979	-0.212444	-0.0117123	-0.174166	0.435452	0.190955	-0.178665	-0.262029	0.174829	0.0718086	-0.508318	-0.165221
SP1	-0.223067	0.485144	-0.12392	-0.127599	-0.105725	0.0778572	-0.0929187	-0.135381	-0.0667533	0.0654856	0.14207	-0.0655675	0.0967086	-0.127204	0.124168	0.256915	0.366009	-0.0404876	0.366409	-0.134332	-0.0861952	0.0412641	-0.0493331	0.016412	0.0901678	0.183418	0.110036	0.100217	-0.0271581	-0.230817
ATF1	-0.0852922	0.0522124	-0.156168	0.0442579	0.151835	0.35426	0.129932	0.010192	0.218813	0.157835	0.0649288	-0.12885	-0.0184053	-0.178368	-0.124914	-0.375571	-0.166759	0.157192	0.169167	-0.192927	-0.0481734	-0.161093	0.0558148	-0.127644	-0.152471	0.0234156	-0.0728001	-0.262973	-0.218297	0.0797735
ETS1	0.155777	0.055577	0.283262	0.453095	0.348115	0.320355	0.316694	0.308308	0.0585086	-0.0227085	-0.131293	0.229878	0.0509285	0.176038	0.0637315	-0.00574205	-0.123431	0.185885	-0.00192596	0.058409	0.363839	0.116587	0.00787106	0.158531	0.181323	0.0886361	0.138246	-0.381368	-0.0599137	0.205408
EP300	-0.196345	-0.294004	-0.23804	-0.192631	-0.0379453	-0.0594037	-0.336395	-0.235287	0.0756773	0.335456	-0.127298	-0.392132	0.298566	-0.4304	-0.306471	-0.375672	-0.166176	-0.227222	-0.252882	-0.519173	-0.406906	-0.409024	0.216436	-0.0656068	-0.298239	-0.348954	-0.201704	0.121499	-0.604986	-0.332542
NFE2	-0.00749131	-0.467466	0.0133559	-0.218592	0.0208859	-0.227986	-0.233548	-0.0659076	0.0358876	0.12536	-0.132849	-0.248164	0.298208	-0.231096	-0.105178	-0.0944167	-0.169969	-0.18341	-0.400608	-0.285885	-0.215806	-0.26071	0.00490561	-0.059008	-0.134248	-0.374132	-0.11566	0.279609	-0.437305	-0.309683
ATF2	-0.38858	0.349039	-0.217676	0.00946741	-0.0166679	0.0142349	-0.174715	-0.17724	-0.162221	0.0955159	-0.230855	-0.0572859	-0.069927	-0.0829896	-0.224792	-0.16482	0.0577979	-0.275365	0.128233	-0.206069	-0.173577	-0.168615	0.114381	0.00246206	-0.0265091	0.130301	-0.133159	-0.22732	0.00622145	-0.240305
RELA	0.519796	0.135124	0.336114	0.249377	0.010386	0.337172	0.38339	0.288772	0.0965108	-0.227971	0.335035	0.140037	-0.246548	0.1647	0.363629	0.304838	0.310005	0.570384	0.369199	0.550451	0.41831	0.350072	-0.0956617	0.146686	0.0725696	0.292733	0.267642	-0.0510622	0.389417	0.554026
MYCN	-0.380841	-0.560314	-0.251614	-0.321593	-0.184379	-0.408737	-0.435356	-0.313903	-0.210138	0.0905901	-0.402109	-0.212657	0.154165	-0.285856	-0.353443	-0.275952	-0.420165	-0.386437	-0.673102	-0.52022	-0.447527	-0.364166	-0.171879	-0.263672	-0.0703845	-0.266713	-0.444726	0.0321634	-0.322032	-0.391968
YY1	-0.449304	0.458331	-0.353002	0.0407849	0.07647	-0.133099	0.0541189	-0.178464	-0.0980892	0.0815747	0.139578	0.373781	0.0278034	0.235894	-0.100866	0.150833	-0.00249858	-0.214421	0.132586	-0.201672	-0.0171124	0.138456	0.0340417	-0.000392683	0.317145	0.0348299	-0.012704	-0.0622532	0.142867	0.0151027
IRF1	0.698104	-0.17495	0.512407	0.465512	0.256835	0.303979	0.370034	0.51053	0.302607	-0.0735045	0.358357	0.209293	0.140864	0.279162	0.26177	0.136885	0.0624273	0.438314	0.109797	0.4319	0.476629	0.130024	0.140803	0.249775	-0.113241	0.0530037	0.41342	0.129027	-0.101776	0.476695
IRF2	0.545004	0.437635	0.38731	0.519793	0.535364	0.579853	0.650124	0.636734	0.386819	0.0171497	0.502361	0.302589	0.185417	0.506368	0.402375	0.240284	0.204116	0.488961	0.653637	0.509364	0.698884	0.270286	0.14692	0.395286	0.115028	0.177231	0.583913	0.02051	-0.0444379	0.549522
TAL1	-0.0691362	-0.163655	-0.200385	-0.236166	-0.235175	-0.0377469	-0.255106	-0.266945	0.100629	0.167793	0.12804	-0.135429	0.108203	-0.373945	-0.0974995	-0.163037	0.0943832	-0.03534	-0.0562803	-0.25711	-0.339675	-0.15593	0.183426	-0.172735	-0.281935	-0.21898	-0.0510734	0.192784	-0.281352	-0.150578
TFCP2	0.0136049	0.312614	-0.0280576	0.234883	0.2243	0.387796	0.057916	0.0888693	0.230328	0.336968	0.0987554	-0.128167	0.251386	-0.169133	0.075089	-0.14271	0.207769	0.0871272	0.357116	-0.258851	0.0200994	-0.0668511	0.229018	0.1749	-0.0505289	0.0602636	0.22368	-0.128226	-0.472019	-0.0741047
GATA2	-0.028239	-0.279377	-0.0172786	-0.0347006	-0.0873922	-0.134894	-0.315666	-0.0675786	0.0204397	0.206307	-0.203742	-0.115111	0.237261	-0.132358	-0.201544	-0.219073	-0.102919	-0.309166	-0.293954	-0.218358	-0.229988	-0.254391	0.280376	-0.00563601	-0.273963	-0.273594	-0.00200272	0.121087	-0.433013	-0.319238
GATA3	-0.387473	0.0244201	-0.457091	-0.209153	0.0195664	0.0851022	-0.298562	-0.312639	0.0118836	0.377664	-0.170778	-0.397803	0.351089	-0.497678	-0.254088	-0.256668	0.0106801	-0.113625	-0.0450874	-0.673629	-0.383367	-0.33169	0.10306	-0.0566109	-0.0568981	-0.243468	-0.158068	-0.0587201	-0.596264	-0.369302
MECOM	-0.0982339	-0.158934	0.0683138	-0.042949	0.196636	-0.129891	-0.0664287	0.112005	0.0268975	0.182649	-0.096334	0.00712305	0.469716	0.0564405	0.00302644	0.076784	-0.234552	-0.1777	-0.197414	-0.23845	-0.0169637	-0.144763	0.0654461	0.0148125	0.120991	-0.17883	0.107129	0.221502	-0.479035	-0.21534
MZF1	-0.275433	0.207947	-0.355356	-0.313953	0.0882574	-0.181236	-0.124669	-0.277444	-0.0851876	0.192787	-0.00249231	-0.275782	0.354334	-0.256992	-0.105999	0.059922	-0.0149415	-0.086044	0.14618	-0.242896	-0.137332	0.0685962	0.0963274	0.112943	0.346617	-0.152664	-0.00553479	0.165445	-0.209182	-0.200423
IKZF1	0.0839421	0.47284	0.0169759	0.221522	0.232537	0.131877	0.225501	-0.0140379	0.171357	0.0385871	0.327017	0.134008	-0.0197733	0.0622803	0.0479591	-0.0350729	0.215642	0.136633	0.495144	0.194326	0.175942	0.26151	0.465105	0.265485	0.0746922	0.0481044	0.207531	-0.0501409	0.139049	0.258154
IKZF2	-0.136716	-0.234954	-0.180737	-0.175915	-0.0293392	-0.0908822	-0.339275	-0.208145	0.0663491	0.313564	-0.128063	-0.361778	0.321118	-0.38028	-0.282875	-0.300433	-0.122357	-0.24375	-0.194914	-0.422475	-0.33847	-0.31874	0.303806	0.0145409	-0.245306	-0.349855	-0.124428	0.145908	-0.583486	-0.336644
CUX1	0.288922	0.113731	0.091717	0.119999	-0.0794956	0.264611	0.290284	0.10032	0.0966346	-0.165986	0.18948	-0.0244181	-0.416971	0.0248821	0.213649	0.0829947	0.157946	0.439712	0.302974	0.415168	0.226605	0.235978	-0.156674	0.0309233	0.00377039	0.289132	0.0503417	-0.258544	0.433534	0.415175
PBX1	0.0216636	-0.276307	0.226216	-0.0845332	-0.134376	-0.201364	-0.0482105	0.158496	-0.174413	-0.191384	-0.158756	0.193862	-0.0403406	0.26619	0.118945	0.168353	-0.162278	-0.116423	-0.377733	0.0866116	-0.00137898	-0.103686	-0.320077	-0.250834	-0.00419055	0.0219256	0.00190059	0.152131	0.058763	-0.190881
PAX6	0.376946	-0.0547472	0.303181	0.342117	0.547138	0.328492	0.505373	0.528992	0.279692	0.09771	0.10454	0.26308	0.191207	0.417964	0.251591	0.0497018	-0.225346	0.292535	0.118851	0.289534	0.504275	0.163034	0.134908	0.199878	0.200471	-0.0669108	0.38164	-0.0348755	-0.196987	0.304108
CEBPB	-0.418867	-0.349012	-0.199004	-0.27616	-0.210214	-0.215715	-0.470419	-0.316868	-0.183581	0.268762	-0.356919	-0.27491	0.191646	-0.408977	-0.316261	-0.340539	-0.0725401	-0.433335	-0.464145	-0.588557	-0.539122	-0.449696	0.0793685	-0.169141	-0.25243	-0.284803	-0.329408	0.0791107	-0.56538	-0.547689
CREB1	-0.0461057	0.540626	-0.100993	0.238002	0.379146	0.465269	0.439469	0.178089	0.202832	0.150866	0.21345	0.00614211	0.0145611	0.0801339	0.200977	0.161349	0.160547	0.375749	0.532398	-0.0130191	0.298897	0.175259	-0.0611874	0.120186	0.300922	0.203549	0.229286	-0.318569	-0.0409904	0.214827
CEBPA	-0.0630191	0.0678743	0.0346855	0.053122	-0.0639243	-0.131622	0.121074	0.0203248	-0.215763	-0.273953	-0.0687083	0.2931	-0.240541	0.231069	0.0934313	0.268126	-0.00858152	0.0542709	-0.0654956	0.221061	0.160113	0.228396	-0.332637	-0.0763463	0.311722	0.255297	-0.0719297	-0.109004	0.505329	0.192762
MAX	-0.160518	0.220265	-0.0170347	0.0283479	-0.0350325	-0.0860946	0.108339	-0.0138903	-0.193802	-0.227026	-0.00930926	0.257747	-0.182524	0.224018	0.0705312	0.231638	-0.055403	0.0228598	0.0369271	0.0588136	0.131237	0.203621	-0.359414	-0.093033	0.336661	0.254357	-0.0880566	-0.170467	0.359905	0.104044
USF1	-0.307982	-0.354099	-0.170979	-0.145815	-0.118782	-0.312626	-0.377035	-0.317888	-0.177215	0.0251252	-0.242004	-0.103194	0.315917	-0.358487	-0.334937	-0.235895	-0.268115	-0.250742	-0.515404	-0.56459	-0.344519	-0.263371	-0.172409	-0.171144	0.00541258	-0.179911	-0.366384	0.0220984	-0.345484	-0.258317
HNF1A	0.0375259	-0.53446	-0.0900885	-0.283309	-0.186758	-0.27714	-0.315323	-0.169109	0.031685	0.0962874	-0.349948	-0.492595	0.0421867	-0.375168	-0.149477	-0.160298	-0.197813	-0.051173	-0.434793	-0.190314	-0.313545	-0.315565	-0.0782012	-0.0995806	-0.23122	-0.302927	-0.23747	0.0066037	-0.248396	-0.247398
POU2F1	0.139174	-0.408319	0.131934	-0.0596639	0.0486437	-0.192263	-0.136201	0.00538524	0.0633891	0.153936	-0.0613477	-0.103288	0.323298	-0.0991769	-0.0543708	-0.0736202	-0.18281	-0.135539	-0.381843	-0.130952	-0.093598	-0.150853	0.130587	-0.019524	-0.126824	-0.421034	0.0390195	0.276527	-0.410912	-0.184151
HSF1	-0.127394	-0.500096	-0.15259	-0.31254	-0.306288	-0.4173	-0.470262	-0.306872	-0.0961263	0.0758397	-0.414942	-0.402073	-0.0796194	-0.31516	-0.30945	-0.363892	-0.219378	-0.426294	-0.508414	-0.209343	-0.475857	-0.325298	0.0792789	-0.168286	-0.376387	-0.361078	-0.344471	0.0819621	-0.147982	-0.440859
ACTR1A	-0.338337	0.187171	-0.0546273	0.144998	0.271752	-0.0312116	0.0224233	0.040695	0.0216885	0.16254	0.110873	0.32938	0.358935	0.223178	-0.16167	-0.173696	-0.298243	-0.354722	-0.0501659	-0.362524	-0.0277291	-0.143585	0.093161	-0.0866819	0.072265	-0.0543932	0.00572004	0.102862	-0.338283	-0.147722
RORA	-0.151416	0.385894	-0.264764	0.212394	0.419075	0.419672	0.235322	0.0578157	0.267793	0.357588	0.129485	-0.0723585	0.285396	-0.0823579	-0.00569525	-0.151663	-0.0623499	0.165954	0.369287	-0.35387	0.0954105	-0.00716944	0.150785	0.0869224	0.179919	0.00577626	0.164096	-0.217582	-0.406299	0.0414868
CREBBP	0.258177	0.576585	0.248872	0.526935	0.582707	0.346537	0.532059	0.429738	0.272306	0.0571337	0.478562	0.449316	0.334922	0.477631	0.256545	0.31812	0.114716	0.239697	0.582305	0.241527	0.609857	0.36992	0.230942	0.344285	0.365078	0.130828	0.524421	0.0854906	-0.0657868	0.440057
JUN	0.161624	-0.37206	0.330783	-0.0822426	-0.24167	-0.288954	-0.0601224	0.100134	-0.262805	-0.349231	-0.196866	0.207217	-0.235852	0.207186	0.0654061	0.189482	-0.10819	-0.0445763	-0.385435	0.303275	0.0744469	0.0687564	-0.2757	-0.0758113	0.0422631	0.101808	-0.0805572	0.028176	0.318184	0.00069265
NFYA	0.172047	0.376875	0.110761	0.0387251	-0.0867326	-0.0311582	0.230251	0.057568	0.0359325	-0.257629	0.378606	0.26082	-0.3447	0.290101	0.225161	0.252452	0.231706	0.15407	0.410985	0.495845	0.202045	0.316244	-0.0278134	0.0386837	0.0554768	0.265382	0.146963	0.105663	0.613065	0.318098
ESR1	-0.0769656	-0.309409	0.106729	0.0253423	0.115157	-0.15903	-0.172098	0.0686065	-0.00631611	0.132714	-0.22429	0.0312913	0.294794	0.0306481	-0.129819	-0.178007	-0.174634	-0.359485	-0.377298	-0.24315	-0.120677	-0.237246	0.134649	-0.000273597	-0.136249	-0.256813	-0.0275147	0.185227	-0.411401	-0.312284
NR3C1	0.182652	-0.36625	0.00790365	-0.160545	-0.049788	-0.0120612	-0.155486	-0.0292199	0.100716	0.183577	-0.028019	-0.260387	0.250076	-0.284815	0.00994484	-0.0169235	0.0188383	0.0926442	-0.173976	-0.0892102	-0.128458	-0.128878	0.189964	-0.0173283	-0.141066	-0.29223	0.119732	0.22025	-0.414762	-0.144708
NFKB1	0.533631	0.148418	0.517218	0.512106	0.231021	0.225179	0.503678	0.452486	0.0402093	-0.313479	0.22168	0.444914	-0.195916	0.500346	0.33123	0.281054	0.0259603	0.418074	0.208269	0.599316	0.613671	0.421384	-0.130965	0.177571	0.241164	0.291873	0.282709	-0.155752	0.450755	0.606031
SRF	-0.0207481	0.664058	-0.00147153	0.146324	0.0409576	0.177435	0.224169	0.0639646	-0.0513847	-0.128597	0.235072	0.261582	-0.139622	0.251933	0.19636	0.315556	0.414616	0.103732	0.552411	0.27267	0.252294	0.330667	-0.0061353	0.133837	0.22112	0.285248	0.2123	-0.0145838	0.412672	0.217925
TBP	-0.0682066	0.565627	-0.0720688	0.0793264	0.00919511	0.220656	0.227096	-0.00564129	-0.0291726	-0.0948964	0.267654	0.207709	-0.168993	0.127084	0.194191	0.173485	0.249029	0.190736	0.505039	0.166371	0.156689	0.295413	-0.0498707	-0.000919146	0.226604	0.375646	0.159815	-0.0940259	0.403693	0.216044
SREBF1	-0.483377	-0.26849	-0.328211	-0.197909	0.0122987	-0.325111	-0.3358	-0.332975	-0.112976	0.155654	-0.335074	-0.244743	0.154825	-0.312224	-0.371172	-0.34995	-0.388754	-0.379407	-0.455767	-0.639159	-0.403136	-0.358485	-0.207652	-0.138721	0.016975	-0.185935	-0.498926	-0.109839	-0.321967	-0.355498
STAT6	0.329391	0.0242328	0.386791	0.170423	0.256101	0.245944	0.167352	0.412753	0.219183	0.0828296	0.215143	0.142602	0.462602	0.212157	0.221815	0.233786	0.0311307	0.139677	0.1657	0.0862748	0.295978	-0.00672556	0.146117	0.151671	-0.0274436	-0.0723893	0.404366	0.327063	-0.432317	0.065053
AHR	0.0888422	0.198941	0.0874442	-0.0788468	-0.164653	-0.0419056	0.0466051	0.0179208	0.0303575	-0.124781	0.160961	0.071438	-0.296453	0.176316	0.0596484	-0.123706	-0.0206303	-0.046196	0.22363	0.322683	-0.0438356	0.00417221	0.101257	-0.132871	-0.23213	0.149681	0.079686	0.0859475	0.337576	0.00736098
ARNT	0.0304932	0.02643	0.195058	0.00968454	-0.0582063	-0.0619333	0.228461	0.116115	-0.162728	-0.354869	0.0482888	0.280247	-0.247372	0.261482	0.221228	0.263945	-0.0479117	0.182428	-0.0320367	0.276815	0.210544	0.219497	-0.438748	-0.155441	0.274526	0.311024	-0.018359	-0.0902124	0.452822	0.179255
EGR1	-0.17463	-0.434873	0.0130742	-0.376027	-0.509484	-0.541678	-0.409303	-0.277225	-0.371563	-0.302385	-0.402245	-0.0976353	-0.343272	-0.091911	-0.120026	0.00386293	-0.084528	-0.351857	-0.537662	0.0718912	-0.343424	-0.149708	-0.27808	-0.217248	-0.173806	-0.00122667	-0.401155	0.059266	0.397046	-0.306203
EGR3	0.052322	0.00111654	-0.0976388	0.0938694	-0.0159617	0.285824	0.146384	-0.0430559	0.0687022	-0.0406996	-0.0146232	-0.127124	-0.2964	-0.187589	0.0655137	-0.137578	0.0266908	0.333677	0.112146	0.0264535	0.0492527	0.056784	-0.165756	0.0154473	0.00351269	0.238519	-0.117711	-0.436085	0.222877	0.233546
EGR2	0.168338	-0.307864	-0.000232434	-0.0535008	-0.142275	0.0519028	-0.163982	-0.135901	0.13658	0.083531	0.0319911	-0.298833	-0.0165015	-0.364472	-0.0556305	-0.317289	0.0454955	0.0677368	-0.101364	-0.070093	-0.21214	-0.17414	0.218988	0.000507031	-0.38311	-0.139551	-0.0689982	0.00808691	-0.194348	-0.0644471
GFI1	-0.0850335	-0.144468	-0.239767	0.0150026	0.178843	-0.0285068	-0.0967884	-0.0906579	0.196467	0.30417	-0.0512694	-0.196546	0.276974	-0.124332	-0.197577	-0.286574	-0.323553	-0.150936	-0.149033	-0.349569	-0.15341	-0.15377	0.29458	-0.0522178	-0.0747223	-0.346093	-0.00127081	0.0257134	-0.469086	-0.211875
XBP1	0.261848	0.458345	0.300467	0.300401	0.0977659	0.269867	0.409153	0.328517	0.0860741	-0.202593	0.337819	0.378433	-0.233672	0.409552	0.360562	0.358814	0.268124	0.28099	0.475307	0.476092	0.458927	0.393169	-0.177693	0.141307	0.207042	0.428797	0.297398	-0.0896148	0.440099	0.404509
REST	-0.325868	-0.176615	-0.133466	-0.0732414	0.140907	-0.119185	-0.151007	-0.15871	-0.104482	0.0452412	-0.205081	-0.104738	0.353626	-0.248103	-0.210372	-0.300667	-0.322744	-0.117411	-0.30989	-0.54892	-0.210573	-0.258793	-0.240564	-0.242846	0.146033	-0.0854743	-0.252887	-0.0687507	-0.429494	-0.255516
RREB1	0.13181	0.643425	0.0195248	0.368881	0.382861	0.362271	0.468666	0.195186	0.124915	0.00241238	0.362797	0.278306	0.0179638	0.25825	0.225174	0.300269	0.344979	0.345313	0.614458	0.286938	0.477702	0.438545	0.108774	0.321954	0.393858	0.189722	0.320756	-0.106799	0.246344	0.467344
IRF9	0.259944	-0.143473	0.164828	0.112718	0.158837	0.33308	0.0324754	0.210895	0.224933	0.219241	0.129028	-0.186193	0.37504	-0.146363	0.0435738	-0.127571	0.0338416	0.170473	0.0425298	-0.128168	0.0531436	-0.222278	0.144028	0.0692813	-0.251284	-0.16596	0.192564	0.157025	-0.602846	-0.0452683
EBF1	0.0770034	0.196587	-0.122276	0.279691	0.471306	0.44819	0.279387	0.159381	0.372214	0.397928	0.218161	-0.100446	0.309112	-0.0787826	0.0243397	-0.216709	-0.0315901	0.237275	0.305664	-0.245577	0.148391	-0.024637	0.268537	0.180614	0.0492447	-0.12862	0.21256	-0.12855	-0.496365	0.164303
TP53	-0.113806	-0.296531	-0.0902665	-0.149241	-0.00227377	-0.123849	-0.309727	-0.141981	0.0439683	0.258053	-0.185754	-0.281222	0.288354	-0.28456	-0.229625	-0.30304	-0.0701743	-0.315944	-0.277706	-0.347073	-0.317106	-0.316464	0.300383	0.0182121	-0.2959	-0.374933	-0.0853618	0.18715	-0.503157	-0.380634
LMO2	-0.0654653	-0.301521	-0.106001	-0.17509	0.0397355	-0.0416183	-0.233962	-0.0927537	0.113997	0.295593	-0.0816925	-0.314711	0.402958	-0.33459	-0.146323	-0.221645	-0.0714818	-0.134798	-0.212128	-0.382886	-0.272877	-0.308964	0.21216	-0.0205494	-0.204304	-0.337255	-0.0103094	0.227805	-0.613572	-0.305037
RFX1	-0.0658623	-0.600347	-0.0670486	-0.332182	-0.29037	0.00593643	-0.215328	-0.0690977	-0.114566	0.0520521	-0.453986	-0.39959	-0.0575178	-0.363393	0.0130214	-0.00886025	-0.10398	0.0765869	-0.450686	-0.168208	-0.237801	-0.267682	-0.371227	-0.174569	-0.124997	-0.0438958	-0.242548	-0.142435	-0.180717	-0.216029
NFE2L1	-0.30638	0.139182	-0.149426	0.0642394	0.0217795	-0.0209136	-0.0104916	-0.0716837	-0.191496	-0.0196699	-0.164275	0.130084	-0.0402096	0.0384365	0.0012355	0.178446	0.0307429	-0.0625191	-0.11016	-0.258082	-0.0120544	0.0192414	-0.343621	-0.078072	0.290807	0.142083	-0.12804	-0.213901	0.0771186	-0.0848756
FOXF2	-0.238748	0.32328	-0.144453	0.114329	-0.106107	-0.00153172	-0.0291065	-0.159789	-0.158238	-0.0722676	-0.143104	0.0601929	-0.411663	0.0230553	-0.101746	-0.0609199	0.136218	-0.146069	0.133044	0.0166946	-0.0469259	0.11167	-0.0540674	0.0547483	0.0672054	0.267811	-0.193923	-0.361472	0.422787	0.0346113
FOXC1	-0.251148	-0.120135	-0.183425	-0.388845	-0.37295	-0.408449	-0.283198	-0.339825	-0.388346	-0.238273	-0.236623	-0.100552	-0.111691	-0.169295	-0.0824032	0.302606	0.136014	-0.12802	-0.266175	-0.0237302	-0.197064	0.0957336	-0.30011	-0.0760649	0.200444	-0.0236016	-0.27788	0.0922806	0.349009	-0.137608
NFATC4	-0.300171	0.439151	-0.31421	-0.0334119	0.0250258	-0.0740115	-0.197193	-0.225826	-0.00927913	0.249362	-0.0472904	-0.0836349	0.0886947	-0.0400388	-0.265698	-0.221352	0.00969072	-0.383662	0.269405	-0.181796	-0.193574	-0.0291087	0.417409	0.0608865	-0.0389517	-0.114299	-0.0131256	0.019409	-0.0939867	-0.200566
PAX8	0.203165	-0.0454288	-0.0323333	-0.178535	-0.222757	0.073482	-0.12362	-0.137156	0.0842761	0.0264537	0.0136443	-0.479814	-0.0713624	-0.431849	0.0372598	-0.00660398	0.234012	0.278781	0.155928	0.0298864	-0.161117	-0.0742271	0.0483611	0.0198661	-0.213868	-0.00434781	0.0167972	0.0208746	-0.0430284	-0.0325997
ETS2	0.0505587	0.671239	0.118642	0.328321	0.246686	0.215682	0.432608	0.255414	0.0453133	-0.139206	0.324513	0.515919	-0.127424	0.532053	0.267777	0.331655	0.225321	0.137373	0.542063	0.371127	0.443167	0.408872	0.0381956	0.15667	0.319169	0.297352	0.327788	-0.0836317	0.421014	0.339604
MSX1	0.341044	0.481289	0.16832	0.275709	0.133654	0.352122	0.402469	0.215974	0.210555	-0.0820061	0.432648	0.178578	-0.214591	0.213744	0.278819	0.167453	0.280877	0.38296	0.614229	0.47704	0.387552	0.389915	0.112081	0.216639	0.0912525	0.313478	0.326287	-0.0940203	0.405791	0.479252
EN1	-0.130159	0.218131	-0.222306	0.156807	0.146919	0.119541	0.0734094	-0.00738756	-0.00177038	0.111338	-0.148951	0.0313429	-0.0499177	0.0749479	-0.154961	-0.065626	-0.15216	0.0312123	0.0842389	-0.129723	0.0937489	0.0713419	-0.038231	0.100709	0.224855	0.0470372	-0.0714061	-0.368654	0.0295226	0.149228
SOX9	-0.160389	0.640548	-0.0524639	0.328351	0.36829	0.0333728	0.315979	0.0967723	0.00893211	-0.0295393	0.244787	0.490701	-0.00638231	0.461261	0.0619164	0.0854493	0.0488352	-0.0980948	0.401282	0.130771	0.294151	0.293671	0.12502	0.157046	0.36083	0.165251	0.167261	-0.0860227	0.292299	0.227235
ZEB1	0.38728	-0.393254	0.284758	-0.0490028	-0.147323	0.112403	0.102355	0.166306	-0.0492071	-0.222009	-0.189112	-0.0971886	-0.285943	-0.0903562	0.244821	0.0889983	0.0773119	0.358427	-0.161397	0.408592	0.14155	0.0978271	-0.260921	-0.00701679	-0.0433632	0.147324	0.0109379	-0.115366	0.330461	0.196562
TGIF1	0.255569	-0.33955	0.115808	-0.264498	-0.24183	-0.277731	-0.0445709	0.0190478	-0.0121348	-0.187682	0.029708	-0.170615	-0.183093	0.0231205	0.0852352	0.267052	0.0132444	0.0816032	-0.153932	0.369686	0.0271822	0.0696785	-0.125122	0.0585618	-0.0612295	-0.0522103	-0.0202473	0.199019	0.304412	0.110926
MEIS1	-0.312633	0.615366	-0.304568	0.277018	0.36216	0.226335	0.136156	-0.00146577	0.0426968	0.329595	0.0797503	0.181437	0.194273	0.150312	-0.0946503	0.0197736	0.156699	-0.115054	0.369348	-0.252433	0.108519	0.081943	0.279479	0.258556	0.276003	0.00767555	0.158807	-0.188027	-0.158178	0.0534853
FOXJ2	0.0603459	0.208742	-0.0786952	-0.02805	-0.20203	-0.144994	0.0357653	-0.126284	-0.0604932	-0.123701	0.0939461	0.175339	-0.469953	0.172724	0.0557934	0.188599	0.287167	-0.0272471	0.167264	0.419315	0.0383735	0.309183	0.195758	0.12237	-0.00586123	0.011967	0.0295152	-0.020536	0.634179	0.205135
E2F1	0.184979	0.288475	0.264687	0.179102	0.0419077	0.053718	0.360131	0.238375	-0.0241831	-0.279392	0.203382	0.401989	-0.357635	0.45139	0.31985	0.361947	0.243674	0.149248	0.277495	0.559842	0.378807	0.374743	-0.140944	0.144686	0.182336	0.306826	0.180403	-0.04601	0.649767	0.363437
TTF1	-0.195063	0.309981	-0.111129	0.00507162	0.0370567	-0.141546	0.12494	-0.051728	-0.159024	-0.162739	-0.0617475	0.153443	-0.270787	0.22459	0.0598935	0.25687	0.133969	-0.064764	0.127943	0.165318	0.117562	0.251776	-0.169904	0.114879	0.315754	0.173987	-0.0731814	-0.146642	0.534244	0.11074
VDR	-0.17642	0.136304	0.0216998	-0.115582	-0.0527569	-0.135508	-0.0793613	-0.018048	0.0679195	0.0510054	0.137475	0.0317348	-0.103425	0.122748	0.0443631	-0.112235	0.012211	-0.326092	0.0826569	-0.107926	-0.183913	-0.122641	0.0496547	-0.0808036	-0.198855	0.0385623	-0.00653878	0.102703	-0.0585176	-0.298465
NKX3.1	-0.0404274	-0.448593	-0.0119841	-0.327016	-0.366836	-0.351362	-0.208929	-0.169542	-0.308153	-0.250554	-0.231807	-0.0420352	-0.120335	-0.0897157	-0.0543374	0.150267	-0.286953	0.0116324	-0.467437	0.0343183	-0.133861	-0.0285395	-0.405291	-0.224154	0.113187	0.0481031	-0.256133	0.0034154	0.272934	-0.00255945
BPTF	0.225356	0.247645	0.308839	0.526344	0.347124	0.243365	0.36022	0.346779	0.189695	-0.00718863	0.275064	0.444796	-0.00976031	0.458758	0.0759096	-0.258058	-0.278589	0.028168	0.175206	0.157388	0.319731	0.102643	0.130252	-0.0623114	-0.014845	0.150467	0.226838	-0.101346	-0.0274746	0.227335
STAT5B	0.280556	0.352281	0.410248	0.363559	0.504624	0.348845	0.443294	0.552512	0.244292	0.0790848	0.390035	0.418353	0.475064	0.496285	0.334434	0.310316	0.0944158	0.179565	0.388714	0.177192	0.498774	0.149122	0.180342	0.201068	0.178245	0.0227295	0.582313	0.291298	-0.340473	0.177398
STAT5A	0.140644	0.0936901	0.223529	0.283317	0.481034	0.266185	0.275437	0.273319	0.303071	0.17909	0.260375	0.167015	0.321646	0.163893	-0.012057	-0.198615	-0.235283	0.0307344	0.150863	-0.0816623	0.206775	-0.0177788	0.390802	0.0819776	-0.0444858	-0.158314	0.24446	0.144775	-0.418754	0.0602729
GATA6	-0.302437	-0.166601	-0.308981	-0.159465	0.0880098	-0.13955	-0.328698	-0.246287	0.0236246	0.344334	-0.193613	-0.256802	0.436765	-0.324	-0.297674	-0.297491	-0.204648	-0.304786	-0.242283	-0.579724	-0.3498	-0.336614	0.26636	-0.03762	-0.0969099	-0.389724	-0.11624	0.0944106	-0.636564	-0.417831
KLF12	-0.430474	0.229277	-0.342841	-0.247295	0.0286023	0.0251473	-0.0817964	-0.165852	-0.156121	0.181119	0.0115825	-0.0221415	0.352444	-0.133925	0.0624364	0.212522	0.225324	-0.0477531	0.0983433	-0.348417	-0.148595	-0.0651306	-0.101363	-0.0437659	0.270361	-0.00269549	0.0362464	0.180403	-0.245482	-0.216532
TFAP2A	0.336627	-0.407948	0.231816	-0.189289	-0.436969	-0.0408973	-0.0480619	0.0131769	-0.0656684	-0.280285	-0.0475374	-0.132253	-0.434322	-0.102	0.20656	0.0461979	0.149338	0.229558	-0.147129	0.456671	-0.0480274	0.0281462	-0.192776	-0.127859	-0.291601	0.154406	-0.0557369	-0.000638828	0.410395	0.110505
FOXO4	-0.0558435	-0.0752878	0.0805961	-0.102502	-0.37055	-0.351799	-0.186863	-0.162046	-0.313044	-0.29125	-0.197073	0.127553	-0.420267	0.0874893	0.000908733	0.180283	0.196867	-0.237477	-0.195571	0.27384	-0.0777542	0.209367	-0.0987102	-0.032228	0.0314033	0.119657	-0.170535	-0.00592672	0.559597	-0.0439701
FOXO1	0.369919	0.225797	0.200194	0.424555	0.160668	0.401326	0.35323	0.226849	0.359606	0.107695	0.372148	0.154269	-0.254954	0.134876	0.180146	-0.126762	0.169666	0.24923	0.389614	0.297068	0.262424	0.230302	0.289724	0.184652	-0.183172	0.138288	0.258323	-0.168665	0.111722	0.367403
FOXO3	0.0240004	0.146939	0.0215353	0.252534	0.280871	0.218505	0.0281452	0.144788	0.229634	0.362522	0.0828143	0.00315696	0.357782	0.00209419	-0.0131813	-0.125543	0.112221	-0.113233	0.165542	-0.205531	0.0228252	-0.0530046	0.465042	0.176335	-0.0903109	-0.158712	0.261231	0.11983	-0.524917	-0.0862696
PITX2	-0.0674814	0.505153	-0.0524608	0.0240637	-0.0302609	0.0268146	0.122449	-0.0253937	-0.149899	-0.147316	0.058146	0.169295	-0.233525	0.18238	0.179358	0.390251	0.365437	0.0701058	0.369511	0.274231	0.199156	0.3668	-0.0917372	0.176708	0.324558	0.258516	0.115581	-0.113556	0.515059	0.146224
ATF6	0.0439848	-0.376874	0.036014	-0.156784	-0.0267804	-0.244802	-0.219452	-0.0157681	0.0607133	0.128274	-0.0915632	-0.158236	0.325425	-0.113855	-0.118687	-0.0516513	-0.109458	-0.168075	-0.326126	-0.194383	-0.189049	-0.256938	0.16424	0.00777131	-0.185831	-0.34284	0.0244066	0.307024	-0.441151	-0.262913
BACH2	0.120506	-0.14321	0.197537	-0.17712	-0.289339	-0.240612	-0.0128528	0.0102398	-0.254274	-0.370435	-0.150975	0.123756	-0.37413	0.155796	0.204271	0.333459	0.131232	0.0538685	-0.135636	0.448291	0.0749089	0.194888	-0.251851	-0.0508563	0.0842797	0.17432	-0.019191	0.0102513	0.596653	0.040555
PATZ1	0.142739	-0.27156	-0.0847904	-0.163442	-0.442004	-0.00911491	-0.188824	-0.234357	-0.0860888	-0.164685	-0.113214	-0.262511	-0.431962	-0.327557	-0.00623926	-0.0723111	0.0716324	0.22805	-0.0907843	0.135034	-0.165478	0.033569	-0.152192	-0.0775968	-0.180185	0.153424	-0.23195	-0.2656	0.331307	0.124171
STAT1	0.591095	0.0138695	0.542073	0.348597	0.198572	0.184096	0.429471	0.482561	0.13657	-0.180037	0.13261	0.246378	-0.173751	0.468026	0.38174	0.283927	0.142215	0.289126	0.189237	0.646348	0.551131	0.375866	0.0897496	0.357576	0.0984586	0.0857216	0.389439	-0.0719771	0.24723	0.35796
STAT3	-0.182144	-0.0859218	-0.36358	-0.18449	-0.00621674	0.180971	-0.0635874	-0.206702	0.0550869	0.22531	-0.0678538	-0.349143	-0.0120897	-0.398494	-0.0501339	-0.259234	-0.10939	0.193188	-0.0139145	-0.346658	-0.260665	-0.233207	-0.0804959	-0.17725	-0.0541186	-0.0131636	-0.142874	-0.199544	-0.217162	-0.134613
STAT4	0.0939376	0.47677	0.232287	0.369499	0.228184	0.0884461	0.364674	0.234069	-0.0421312	-0.186925	0.253713	0.50471	-0.140048	0.487843	0.148658	0.285451	0.0624519	0.0805792	0.313328	0.287381	0.42695	0.382324	-0.073095	0.115767	0.370386	0.273974	0.207469	-0.0843577	0.350566	0.306217
ESRRA	-0.27908	0.458371	-0.355291	0.0129712	0.116435	0.131291	0.0524624	-0.160353	-0.0438148	0.104053	0.0211117	-0.0349459	0.0239239	-0.0709401	-0.0364616	0.105546	0.0690446	0.067364	0.293903	-0.251604	0.021428	0.117784	-0.110343	0.0669621	0.325933	0.113744	-0.0299472	-0.239598	0.0477308	-0.00230998
ATF3	-0.344208	0.396544	-0.0613467	-0.0816601	-0.0297136	-0.0101214	0.02496	-0.0538114	-0.226968	-0.144255	0.0557152	0.199295	-0.00501484	0.126056	-0.034897	0.215043	0.0490882	-0.101939	0.176376	-0.119607	0.0335971	-0.00833695	-0.307464	-0.120953	0.218422	0.21113	-0.0756248	-0.061055	0.074316	-0.120188
ATF4	-0.0629494	-0.155	-0.0191219	-0.0260119	0.1577	-0.0539078	-0.127036	0.0602776	0.0583458	0.251104	-0.0629279	-0.01247	0.44215	0.0386367	-0.105578	-0.0591057	-0.202216	-0.220578	-0.198263	-0.310266	-0.0728065	-0.200412	0.240978	0.00870056	-0.0401525	-0.342444	0.137376	0.188384	-0.603777	-0.302151
JUND	0.0313866	-0.399211	0.212306	-0.223964	0.00465051	-0.2284	-0.0540848	0.115455	-0.104773	-0.113327	-0.108701	0.0579845	0.148303	0.0852326	0.111831	0.155369	-0.133398	-0.0877791	-0.323349	0.0270626	-0.0054646	-0.102114	-0.183335	-0.0532776	0.0487914	-0.0963659	-0.0120715	0.258984	-0.0979726	-0.156956
PPARA	-0.0969088	-0.536392	0.0889239	-0.140113	-0.0564557	-0.211066	-0.216375	0.0273066	-0.1257	0.0325822	-0.364122	-0.0858615	0.190833	-0.0477404	-0.107531	-0.140095	-0.305129	-0.241713	-0.569825	-0.26116	-0.19776	-0.294294	-0.142562	-0.195112	-0.102102	-0.21131	-0.169809	0.106878	-0.347879	-0.310119
ELF2	-0.0606472	0.19114	0.0396575	0.103343	0.0180488	-0.144012	0.216537	0.0115845	-0.112489	-0.285406	0.0988514	0.285833	-0.377597	0.300805	0.0612295	0.128748	-0.0338171	-0.0111454	0.0655766	0.278673	0.151577	0.232464	-0.20377	-0.043032	0.195429	0.242603	-0.11188	-0.0713038	0.623774	0.232169
CEBPG	-0.375524	0.148357	-0.0684796	-0.0333314	0.062297	-0.243093	-0.149776	-0.0347379	-0.247179	0.0331665	-0.167658	0.228851	0.246953	0.187156	-0.122816	0.11735	-0.0118694	-0.406898	-0.127786	-0.206475	-0.0683302	-0.0681526	0.00157998	0.00106685	0.209227	-0.0233175	-0.0337261	0.148198	-0.133399	-0.258252
DBP	0.182565	0.530731	-0.0167991	0.424518	0.406924	0.463126	0.474347	0.254616	0.373644	0.224549	0.379194	0.16178	0.000246411	0.229186	0.195056	0.010256	0.0835517	0.357069	0.574979	0.104118	0.357312	0.261513	0.262404	0.182051	0.179885	0.122625	0.40264	-0.293861	-0.0918704	0.331397
FOXM1	-0.351314	-0.478166	-0.365817	-0.290415	-0.176429	-0.285039	-0.458787	-0.37563	-0.0947343	0.213023	-0.352826	-0.389077	0.181499	-0.443203	-0.448724	-0.384009	-0.456202	-0.293482	-0.535954	-0.619073	-0.503268	-0.395385	0.0151588	-0.218743	-0.139787	-0.275794	-0.425171	-0.032589	-0.425134	-0.351114
GATA4	-0.361128	0.456694	-0.374208	0.108224	0.239446	0.103864	-0.0630377	-0.146682	0.0403583	0.327478	0.0397959	-0.0219292	0.315197	-0.0492066	-0.15436	-0.0787406	-0.0124657	-0.170677	0.248886	-0.45796	-0.069199	-0.0307089	0.191429	0.0785667	0.209552	-0.0681208	0.0277444	-0.0983278	-0.379723	-0.153822
FOXA1	-0.235214	-0.15942	-0.213195	-0.155204	-0.0663005	-0.0461353	-0.273823	-0.224135	0.147884	0.289696	-0.134984	-0.26491	0.0455819	-0.32725	-0.294243	-0.484126	-0.20661	-0.324696	-0.139076	-0.382299	-0.406798	-0.319138	0.276924	-0.163379	-0.378501	-0.265807	-0.212598	0.00835866	-0.396347	-0.336279
HOXA4	-0.047162	-0.0677011	-0.0844435	0.06203	-0.0926383	0.0706595	-0.223085	-0.0779901	-0.173582	0.107806	-0.28374	-0.213457	0.139012	-0.201425	-0.226293	-0.00904057	-0.0562712	-0.0653122	-0.213127	-0.309553	-0.0711393	-0.0983578	-0.0847945	0.0132727	0.0505836	-0.0617884	-0.0780325	-0.175474	-0.249227	-0.170468
NR1H3	0.0298141	0.145772	0.0639221	0.251956	0.00922145	0.268322	0.219984	0.107138	0.00984595	-0.0672087	-0.0352192	0.187947	-0.297578	0.116729	0.164888	0.0249594	0.0488934	0.216755	0.123871	0.0651726	0.17802	0.165245	-0.215507	0.0193187	0.122238	0.303743	0.0107996	-0.481633	0.20036	0.198792
MAF	-0.162371	-0.265139	0.0425945	0.0759774	-0.0139716	-0.218272	-0.154805	-0.0516898	-0.156798	-0.0165102	-0.107465	0.0397415	0.0246366	0.0322558	-0.18083	-0.0945619	-0.122448	-0.328906	-0.405	-0.147762	-0.147238	-0.194085	0.0661656	-0.115659	-0.119326	-0.114072	-0.184409	0.13719	-0.104094	-0.210762
MAZ	-0.178998	-0.587144	-0.307157	-0.388438	-0.236445	-0.288557	-0.466315	-0.380911	-0.0866755	0.160278	-0.37289	-0.513385	0.0768322	-0.533822	-0.343996	-0.341952	-0.188566	-0.243282	-0.487966	-0.330331	-0.467613	-0.344794	0.109735	-0.0368794	-0.266273	-0.362007	-0.388641	0.0415976	-0.263919	-0.313812
MTF1	0.202456	0.33497	-0.0138651	0.131343	0.105489	0.444923	0.180534	0.0828528	0.256421	0.128099	0.282679	-0.110611	0.0467731	-0.137063	0.178618	-0.0328792	0.226188	0.356486	0.506361	0.0449771	0.11705	0.0807293	0.171569	0.0780621	-0.0794828	0.123329	0.273777	-0.0899181	-0.116518	0.14377
ETV4	0.534725	0.258183	0.522212	0.673882	0.536827	0.390414	0.69878	0.668407	0.241641	-0.120733	0.357631	0.558885	0.0819124	0.672732	0.373227	0.350824	0.0062677	0.435943	0.306565	0.509778	0.78032	0.393083	-0.00963564	0.315304	0.324184	0.192504	0.496379	-0.0932712	0.133911	0.628208
SPI1	0.326218	-0.140321	0.200049	0.42058	0.399469	0.279905	0.228829	0.306435	0.350984	0.238391	0.21575	0.0917812	0.379053	0.0749426	0.0128639	-0.20173	-0.161144	0.17807	0.00483326	-0.0885176	0.201141	-0.0904171	0.349416	0.165051	-0.132298	-0.174417	0.271851	0.0589769	-0.50931	0.208379
SP3	-0.0898952	-0.281495	-0.14058	-0.148105	-0.0541316	-0.0355544	-0.302898	-0.158954	0.128758	0.301934	-0.0888069	-0.305006	0.320608	-0.379626	-0.212765	-0.292907	-0.123739	-0.154587	-0.208081	-0.415777	-0.330498	-0.322198	0.252047	-0.049688	-0.279531	-0.281951	-0.0742711	0.127979	-0.586658	-0.29581
TCF4	-0.0371075	-0.148637	-0.299501	-0.282235	-0.327759	-0.18764	-0.286179	-0.422117	-0.0243046	0.00963401	0.0614998	-0.309787	-0.123157	-0.427079	-0.22987	-0.175056	-0.160826	0.0918947	-0.0878237	-0.193448	-0.316942	-0.0849956	-0.0419901	-0.185663	-0.124435	-0.100267	-0.283957	-0.0400006	0.0481201	0.0328093
TEF	-0.396392	-0.247201	-0.409036	-0.566347	-0.344051	-0.360883	-0.542098	-0.41318	-0.180025	0.16729	-0.245814	-0.427901	0.325107	-0.450647	-0.310098	-0.00864783	-0.0486613	-0.318993	-0.312104	-0.481496	-0.50629	-0.32604	-0.0496275	-0.178443	-0.0777012	-0.298398	-0.268915	0.303778	-0.384448	-0.470421
E4F1	-0.0388213	-0.531611	0.0321494	-0.18586	-0.177137	-0.094551	-0.32298	-0.0490501	-0.0829996	0.118995	-0.358525	-0.218962	0.120745	-0.219067	-0.190211	-0.258364	-0.154076	-0.216601	-0.465247	-0.218643	-0.290337	-0.378767	0.0905462	-0.169365	-0.335338	-0.279607	-0.142743	0.0879462	-0.459766	-0.378836
TCF12	-0.276388	0.0481917	-0.296297	-0.382273	-0.123532	0.179988	-0.154321	-0.133535	0.0606891	0.221704	-0.0198991	-0.305645	0.237659	-0.315972	0.027915	-0.110279	-0.00885123	0.0145328	0.138281	-0.336847	-0.30042	-0.2659	-0.0744614	-0.203868	-0.132201	0.050536	-0.00531762	0.108368	-0.28953	-0.26002
IRF8	0.398946	-0.189896	0.108178	0.00885742	-0.046698	0.247607	0.0422469	0.127259	0.207048	0.0180991	0.211473	-0.242842	0.116037	-0.184116	0.0768702	-0.0127246	0.11778	0.372802	0.106709	0.167773	0.0670547	-0.0974769	0.0868797	0.06374	-0.282188	-0.052472	0.15272	0.138901	-0.172358	0.190553
SMAD3	-0.355303	-0.178869	-0.273777	-0.283846	0.0642087	-0.290919	-0.260988	-0.180398	-0.0428489	0.196262	-0.147063	-0.126739	0.337355	-0.0891523	-0.174846	-0.180448	-0.30671	-0.396751	-0.275069	-0.394059	-0.321451	-0.268803	0.122618	-0.176479	-0.0158168	-0.259819	-0.101548	0.285912	-0.330043	-0.427178
TEAD1	-0.0482563	-0.237681	0.00697362	-0.328636	-0.0738849	-0.0673211	-0.1977	-0.000777548	-0.127249	0.0905662	-0.18975	-0.145419	0.363285	-0.157236	0.117965	0.200333	0.196298	-0.0698085	-0.191603	-0.124948	-0.126657	-0.174301	-0.0505269	0.0220918	-0.00943194	-0.22606	0.0901514	0.350068	-0.322869	-0.318375
GTF2I	0.138237	-0.430854	0.00166948	-0.120891	-0.01555	0.0396208	0.102601	-0.0328123	0.0552064	-0.0392879	-0.000516558	-0.216595	-0.137424	-0.232725	0.0880545	-0.0302556	-0.185341	0.277366	-0.235512	0.0629308	-0.0045769	0.0488637	-0.231072	-0.127953	0.0499431	-0.0206407	-0.150226	-0.0405483	0.116974	0.143143
GTF2A1	-0.340822	0.326176	-0.392797	-0.114434	0.329475	-0.204824	-0.0171152	-0.157699	0.0507888	0.246892	0.0314529	-0.0942596	0.40181	-0.00811407	-0.169885	-0.0242125	-0.0552287	-0.200434	0.163596	-0.335859	-0.0999182	-0.100433	0.178478	0.15093	0.249076	-0.266547	0.0182663	0.173003	-0.262116	-0.147425
SF1	-0.0923256	-0.461959	-0.312087	-0.341607	-0.11945	-0.123337	-0.238589	-0.313288	0.0454385	0.131057	-0.124354	-0.394433	0.060042	-0.489265	-0.194055	-0.325157	-0.201422	-0.028214	-0.302076	-0.289704	-0.351405	-0.21705	-0.00501316	-0.128315	-0.175035	-0.259467	-0.267785	0.0545194	-0.134016	-0.146076
POSTN	0.315063	0.315302	0.222904	0.236305	0.0611232	0.228962	0.425636	0.226895	0.0518624	-0.247365	0.275876	0.320969	-0.388909	0.330753	0.389256	0.287348	0.250932	0.396206	0.405494	0.594784	0.412226	0.437246	-0.076789	0.101692	0.189285	0.344835	0.26703	-0.176044	0.614037	0.455679
SMAD4	-0.250994	-0.0247136	-0.047581	-0.0722946	-0.148148	-0.248172	-0.0616109	-0.0872853	-0.294276	-0.210241	-0.239769	0.211236	-0.292521	0.196079	-0.0284084	0.0981814	-0.0240863	-0.260235	-0.242992	0.0779263	-0.047488	0.0815975	-0.249906	-0.098576	0.13204	0.115586	-0.202854	-0.1071	0.443616	-0.0937459
LEF1	0.0553951	0.24293	-0.130295	-0.0434759	-0.165024	0.131163	0.0401466	-0.16767	0.0470198	-0.0756594	0.231244	-0.0350761	-0.281312	-0.173957	0.126466	0.0476017	0.36239	0.217813	0.364788	0.20461	-0.000786462	0.199853	0.0287117	0.0575828	-0.0333422	0.20295	0.00764577	-0.098707	0.378114	0.226065
ELF1	0.527729	0.437895	0.383218	0.656103	0.551917	0.457663	0.762346	0.577705	0.410782	-0.0531678	0.588414	0.512352	-0.0346549	0.615163	0.398542	0.291207	0.123299	0.474724	0.558284	0.543393	0.741487	0.472727	0.173983	0.356964	0.236429	0.199391	0.541157	-0.0750876	0.24858	0.699001
HMGA1	0.178963	-0.0121466	0.0955422	0.275004	0.167272	0.080997	0.299677	0.149251	0.0740897	-0.133486	-0.00282348	0.112135	-0.328047	0.23072	-0.0235819	-0.0581046	-0.295771	0.179795	0.0206943	0.292692	0.293169	0.188811	-0.0958661	0.134798	0.130095	0.177576	-0.0863161	-0.374099	0.419041	0.424763
RUNX1	0.455745	0.0499686	0.56387	0.505068	0.385552	0.299598	0.434301	0.598912	0.105469	-0.0603071	0.136114	0.535163	0.22085	0.560724	0.394886	0.334886	0.0981554	0.212504	0.115995	0.428029	0.605951	0.246076	0.10958	0.303558	0.17326	0.0915157	0.505468	0.047745	-0.0414311	0.344763
RUNX2	0.352313	0.106134	0.462852	0.49265	0.319957	0.256418	0.389055	0.476919	0.148544	-0.0361348	0.279891	0.51107	0.0780895	0.545019	0.112665	-0.0837783	-0.30878	0.122721	0.0754393	0.196261	0.390691	0.0966418	0.14593	-0.0715418	0.0163525	0.0898877	0.358666	-0.00385938	-0.1405	0.245882
NFYB	0.251616	0.359141	0.153485	0.156066	0.00524214	0.146881	0.362486	0.157856	0.0838573	-0.259127	0.323555	0.247394	-0.409471	0.295457	0.293919	0.244299	0.188189	0.327809	0.426624	0.517018	0.324467	0.362532	-0.131489	0.0537724	0.120552	0.332354	0.169622	-0.127186	0.617063	0.415416
SMAD1	0.0472843	-0.389598	0.0358666	-0.105347	-0.100603	-0.196145	-0.344581	-0.127782	-0.0551577	0.0763966	-0.201992	-0.214682	0.220596	-0.25365	-0.216577	-0.25573	-0.0424081	-0.262104	-0.331928	-0.175131	-0.243874	-0.24976	0.272886	0.0839908	-0.294754	-0.297677	-0.0837946	0.173515	-0.324997	-0.283144
HIF1A	-0.102276	-0.213741	-0.167193	-0.404516	-0.498256	-0.487155	-0.27864	-0.340978	-0.256435	-0.279425	-0.237539	-0.126067	-0.479171	-0.0831397	-0.0561059	0.083102	0.0523205	-0.165883	-0.250073	0.257879	-0.264331	0.0948161	-0.147443	-0.131309	-0.0687528	0.00405371	-0.298564	-0.000989825	0.6643	-0.0591024
MYC	-0.286395	-0.376377	-0.289508	-0.416116	-0.408042	-0.21314	-0.38704	-0.393745	-0.362791	-0.107366	-0.448902	-0.393875	-0.144814	-0.496369	-0.110595	0.0344409	0.11156	0.0178239	-0.419358	-0.255482	-0.375019	-0.196427	-0.409226	-0.174139	0.0289541	-0.000696197	-0.417817	-0.170546	0.0850532	-0.272129
NF1	-0.206182	0.378595	-0.360973	-0.172865	-0.119464	0.216849	-0.0601548	-0.232406	0.0486554	0.173296	0.190065	-0.176615	0.00470726	-0.267176	-0.0139126	-0.0093596	0.245374	0.0921849	0.373776	-0.216039	-0.175505	0.0637216	0.0658138	-0.111245	0.0179919	0.0486977	0.0318845	0.0094012	-0.0599109	-0.0638813
NFE2L2	-0.0700089	-0.607459	0.0189957	-0.224689	-0.122629	-0.303758	-0.248921	-0.0532656	-0.123173	0.028804	-0.350546	-0.173754	0.155909	-0.134936	-0.112305	-0.0422515	-0.319503	-0.179439	-0.637956	-0.267712	-0.225961	-0.289816	-0.246088	-0.171568	-0.0626194	-0.265467	-0.212892	0.0993643	-0.293413	-0.308093
NFATC2	-0.0540355	0.0675482	0.239726	-0.00474865	-0.034112	-0.182401	-0.0027004	0.169709	-0.20163	-0.155602	-0.183315	0.194759	-0.0358836	0.301903	0.135608	0.268369	0.0742204	-0.172667	-0.117143	0.16909	0.0805129	0.00213662	-0.192264	-0.022691	0.109012	0.109101	0.101526	0.0516741	0.129457	-0.200936
MEF2D	-0.373624	0.303226	-0.48013	-0.0587248	0.110177	0.154761	-0.0923376	-0.285744	0.00894962	0.268081	-0.0884965	-0.243498	0.121438	-0.326745	-0.256788	-0.139683	0.00733149	-0.0270904	0.180145	-0.458955	-0.170265	-0.0576519	0.12885	0.0574727	0.130334	-0.0933946	-0.141229	-0.236948	-0.204019	-0.0854755
RARA	-0.0791548	0.330982	-0.0891578	-0.135596	-0.207272	0.112829	-0.0158175	-0.0905456	-0.195071	-0.092733	-0.0214626	-0.0680069	-0.124277	-0.097566	0.226596	0.442139	0.500405	0.200714	0.286211	0.142714	0.0557147	0.202159	-0.206318	0.105421	0.219752	0.263442	0.0878662	-0.0934035	0.319774	0.0405612
GABPA	0.221295	0.183683	0.3431	0.366558	0.176375	-0.0683584	0.361212	0.34325	0.000930361	-0.278637	0.1858	0.579297	-0.150649	0.639344	0.16898	0.290341	-0.109026	0.0829004	0.065206	0.407464	0.440131	0.282267	-0.115861	0.0904075	0.241464	0.173433	0.182667	-0.0646704	0.372114	0.373891
ADD1	-0.130136	-0.046378	0.115537	0.101486	0.0106465	-0.202737	0.0248498	0.050294	-0.101027	-0.135971	-0.0964758	0.33231	-0.235604	0.323047	-0.0205917	-0.114052	-0.277639	-0.315261	-0.23533	0.0685554	-0.0102301	0.0225788	-0.0993392	-0.181372	-0.000346854	0.111325	-0.0995538	-0.052121	0.310273	-0.0751656

## Sheet: 4B_iCluster_clinical_features
Characteristics	iCluster1 (%) n=19	iCluster2 (%) n=15	iCluster3 (%)	iCluster4 (%)	Total (%)	P-value
			n=20	n=20	n=74
History Asbestos Exposure (n=59)						0.35
No	1 (7)	4 (36)	4 (24)	4 (24)	13(22)
Yes	13 (93)	7 (64)	13 (76)	13 (76)	46 (78)
T stage (n=73)						0.76
T1/T2	10 (53)	5 (33)	9 (45)	9 (47)	33 (45)
T3/T4	9 (47)	10 (67)	11 (55)	10 (53)	40 (55)
T stage (n=73)						0.95
T1	3 (16)	2 (13)	3(15)	4 (21)	12 (16)
T2/T3/T4	16 (84)	13 (87)	17 (85)	15 (79)	61 (84)
N stage (n=72)						0.11
N0	12 (63)	4 (27)	9 (50)	13 (65)	38 (53)
N1/N2/N3	7 (37)	11 (73)	9 (50)	7 (35)	34 (47)
Histological Diagnosis						0.04
Epithelioid	15 (79)	13 (87)	12 (60)	9 (45)	49 (66)
Non-epithelioid	4 (21)	2 (13)	8 (40)	11 (55)	25 (34)
Consensus Histology						0.002
Epithelioid	18 (95)	13 (87)	12 (60)	9 (45)	52 (70)
Non-epithelioid	1 (5)	2 (13)	8 (40)	11 (55)	22 (30)
Smoking History (n=56)						0.98
Lifelong non-smoker	7 (54)	5 (45)	7 (44)	8 (50)	27 (48)
Reformed smoker	6 (46)	6 (55)	9 (56)	8 (50)	29 (52)

## Sheet: 4C_iClust.RNA.classifier
Full dataset
Good iCluster 1 (n=19) vs Poor iCluster 4 (n=20)
CV classification accuracy:			0.97
name	1-score	4-score	av-rank-in-CV	prop-selected-in-CV
ODZ2	-0.0886	0.0842	2.6	1
DHODH	0.0814	-0.0773	2.6	1
EPHB6	0.0619	-0.0588	4.9	1
NFE2	0.057	-0.0541	5.7	1
RCHY1	0.0497	-0.0472	7.1	1
LAYN	-0.0419	0.0398	8.8	1
PRR5L	-0.0292	0.0277	10.7	1
DCBLD2	-0.0267	0.0254	11.7	1
IGF2BP2	-0.0362	0.0344	12	0.9
SELENBP1	0.0229	-0.0218	12.6	0.9
RICH2	0.0251	-0.0238	13.3	0.9
HK1	-0.024	0.0228	13.7	1
LOXL2	-0.016	0.0152	16.3	0.9
GALNT4	0.0039	-0.0037	22.3	0.6
AQP1	0.0049	-0.0047	23	0.6
DUSP7	-0.0025	0.0023	23.2	0.6
CHP	0.0046	-0.0043	25.8	0.3
INMT	0.0003	-0.0003	26.9	0.6
Epithelioid-only dataset
Good iCluster 1 (n=14) vs Poor iCluster 1 (n=15)
CV classification accuracy:			0.93
name	1-score	4-score	av-rank-in-CV	prop-selected-in-CV
DST	-0.0778	0.0726	3.7	1
LOXL2	-0.0713	0.0666	4.6	1
SMURF2	-0.0532	0.0496	6.7	1
FN1	-0.0553	0.0516	7.1	1
KIF23	-0.0519	0.0484	7.3	1
MAST2	-0.0464	0.0433	10.3	1
ANLN	-0.0369	0.0345	11.5	1
COL5A2	-0.0339	0.0317	13.2	1
PRC1	-0.0275	0.0256	14.8	1
ORC1L	-0.025	0.0233	15.9	1
C15orf42	-0.0212	0.0198	16.4	0.9
DHODH	0.0251	-0.0235	17.1	1
CEP55	-0.0202	0.0189	19.5	1
GPC6	-0.0155	0.0145	20.1	1
KIF3C	-0.0174	0.0162	21.4	0.9
ADAMTS5	-0.0167	0.0156	22.6	0.9
MFAP5	-0.0146	0.0136	23.7	1
TGFB1I1	-0.0173	0.0161	23.8	1
THBS2	-0.0163	0.0152	24.3	1
OSBPL3	-0.0151	0.0141	24.3	0.9
GJC1	-0.0164	0.0153	25.7	0.9
FAM40B	-0.0085	0.0079	25.7	0.7
PLXND1	-0.0074	0.0069	28.7	0.8

## Sheet: 4D_iClust.meth.classifier
Full dataset
Good iCluster 1 (n=19) vs Poor iCluster 4 (n=20)
CV classification accuracy:			1
name	1-score	4-score	av-rank-in-CV	prop-selected-in-CV
cg06946797	0.1317	-0.1251	1.9	1
cg07754940	0.1177	-0.1118	3.5	1
cg21502476	0.1173	-0.1115	3.7	1
cg03577157	0.1138	-0.1081	3.7	1
cg25388800	0.1118	-0.1062	4.4	1
cg23019886	0.0912	-0.0866	6.8	1
cg24635971	0.0871	-0.0827	7.1	1
cg21695727	-0.0841	0.0799	7.5	1
cg14020652	0.0605	-0.0574	11.2	1
cg02339793	-0.0468	0.0445	12.2	1
cg09988805	0.041	-0.039	13.6	1
cg00834924	0.0396	-0.0376	13.7	1
cg05264908	-0.0376	0.0357	13.7	1
cg08151828	-0.0383	0.0364	15.4	1
cg14415629	0.0239	-0.0227	16.6	0.9
cg03553715	0.0113	-0.0107	20.9	0.6
cg10191240	0.0126	-0.012	21	0.6
cg17130457	0.0109	-0.0103	21.7	0.6
cg20108357	0.0122	-0.0116	22	0.6
cg21118367	0.0072	-0.0069	23.9	0.5
cg23261919	0.002	-0.0019	25.4	0.6
cg23174662	0.0043	-0.0041	26.9	0.6
Epithelioid-only dataset
Good iCluster 1 (n=14) vs Poor iCluster 1 (n=15)
CV classification accuracy:			0.97
name	1-score	4-score	av-rank-in-CV	prop-selected-in-CV
cg09988805	0.0635	-0.0593	2.1	1
cg09663343	0.0669	-0.0624	2.5	1
cg25913882	0.0584	-0.0545	2.8	1
cg25840173	0.0349	-0.0325	4.5	1
cg01291854	0.0027	-0.0026	8.9	0.4

## Sheet: 4E_iClust.lncRNA.classifier
Full dataset
Good iCluster 1 (n=19) vs Poor iCluster 4 (n=20)
CV classification accuracy:	0.97
name	1-score	4-score	av-rank-in-CV	prop-selected-in-CV
RP1-78O14.1_lincRNA_ENSG00000257894	0.1518	-0.1442	1	1
RP11-359M6.1_lincRNA_ENSG00000257474	0.1153	-0.1095	2	1
LINC01550_lincRNA_ENSG00000246223	0.0668	-0.0635	4.2	1
LINC01105_processed_transcript_ENSG00000232044	0.059	-0.056	4.3	1
RASAL2-AS1_lincRNA_ENSG00000224687	-0.0525	0.0499	5.2	1
RP11-89H19.2_lincRNA_ENSG00000278385	0.0381	-0.0362	6.9	1
AC124789.1_processed_transcript_ENSG00000276170	0.0156	-0.0148	9.8	0.9
RP11-689K5.3_lincRNA_ENSG00000251331	0.0113	-0.0108	10.9	0.7
RP11-434E6.4_lincRNA_ENSG00000277559	0.009	-0.0085	11.3	0.7
CH17-360D5.2_lincRNA_ENSG00000276850	0.0068	-0.0065	11.4	0.8
LINC00941_lincRNA_ENSG00000235884	-0.0039	0.0037	11.5	0.6
AP000705.7_lincRNA_ENSG00000226043	0.0057	-0.0054	12.2	0.5
CTC-573N18.1_lincRNA_ENSG00000250509	0.0058	-0.0055	12.3	0.7
Epithelioid-only dataset
Good iCluster 1 (n=14) vs Poor iCluster 1 (n=15)
CV classification accuracy:	0.86
name	1-score	4-score	av-rank-in-CV	prop-selected-in-CV
LINC01550_lincRNA_ENSG00000246223	0.1455	-0.1358	2.4	1
CTC-573N18.1_lincRNA_ENSG00000250509	0.1421	-0.1326	2.5	1
RP11-817O13.8_lincRNA_ENSG00000260274	0.1372	-0.128	2.6	1
RP11-434E6.4_lincRNA_ENSG00000277559	0.0902	-0.0842	7.4	1
RP11-499E18.1_lincRNA_ENSG00000248161	0.0772	-0.072	8	1
CH17-360D5.2_lincRNA_ENSG00000276850	0.0822	-0.0767	8.1	1
RP11-89H19.2_lincRNA_ENSG00000278385	0.0747	-0.0698	8.7	1
EPB41L4A-AS2_lincRNA_ENSG00000278921	0.0876	-0.0818	9	1
LINC01186_lincRNA_ENSG00000236751	0.0693	-0.0647	10.6	1
PSMB8-AS1_lincRNA_ENSG00000204261	0.0618	-0.0577	12.4	1
AJ011932.1_lincRNA_ENSG00000274248	0.0647	-0.0604	13.7	1
LINC00623_lincRNA_ENSG00000226067	0.0341	-0.0318	21.5	1
RP11-297J22.1_lincRNA_ENSG00000271709	0.0308	-0.0287	22.4	0.9
LINC00869_lincRNA_ENSG00000277147	0.0316	-0.0295	23	0.9
CDC37L1-AS1_lincRNA_ENSG00000273061	0.0329	-0.0307	23.1	1
RP5-1057J7.7_lincRNA_ENSG00000271420	0.0326	-0.0304	23.1	0.9
AC005562.1_processed_transcript_ENSG00000214719	-0.0282	0.0263	24.4	0.9
AC007383.3_lincRNA_ENSG00000227946	0.0261	-0.0243	25.7	1
RP11-88H9.2_lincRNA_ENSG00000231437	0.0267	-0.0249	26.2	0.9
LINC01105_processed_transcript_ENSG00000232044	0.0247	-0.0231	26.8	1
RP11-479G22.8_lincRNA_ENSG00000273038	-0.0192	0.0179	27.1	0.9
LINC00240_lincRNA_ENSG00000224843	0.0266	-0.0249	27.5	0.8
LINC00689_processed_transcript_ENSG00000231419	0.0191	-0.0179	28.3	0.8
AC010894.3_lincRNA_ENSG00000226853	0.0194	-0.0181	29.7	0.7
AC017104.6_processed_transcript_ENSG00000224376	0.0164	-0.0153	30	0.9
TMEM191C_lincRNA_ENSG00000206140	0.015	-0.014	30.1	1
RP11-326I11.3_lincRNA_ENSG00000271646	0.0125	-0.0116	31.8	0.8
RP1-292L20.3_lincRNA_ENSG00000274818	0.0163	-0.0152	32.7	0.8
RP11-689K5.3_lincRNA_ENSG00000251331	0.0105	-0.0098	33.3	0.8
SCAMP1-AS1_lincRNA_ENSG00000245556	0.0102	-0.0095	34.6	0.7
AC034220.3_processed_transcript_ENSG00000233006	0.0128	-0.0119	34.7	0.7
RP11-263K4.5_lincRNA_ENSG00000258170	0.0125	-0.0117	35.1	0.7
AC124789.1_processed_transcript_ENSG00000276170	0.005	-0.0046	35.3	0.8
LINC01569_lincRNA_ENSG00000262468	0.0069	-0.0064	35.6	0.8
RP11-295H24.4_lincRNA_ENSG00000275580	0.0037	-0.0035	35.9	0.7
RPARP-AS1_processed_transcript_ENSG00000269609	0.0088	-0.0082	36.5	0.6
SRP54-AS1_processed_transcript_ENSG00000258704	0.0011	-0.001	41.6	0.6

## Sheet: 4F_iClust.miRNA.classifier
Full dataset
Good iCluster 1 (n=19) vs Poor iCluster 4 (n=20)
CV classification accuracy:			0.97
name	1-score	4-score	av-rank-in-CV	prop-selected-in-CV
hsa-miR-29b-2-5p	0.2165	-0.2057	1	1
hsa-miR-23a-3p	-0.1136	0.108	3.8	1
hsa-miR-193a-3p	0.0882	-0.0838	6.1	1
hsa-miR-148b-3p	0.0858	-0.0815	6.5	1
hsa-miR-1287-5p	0.0753	-0.0715	7.7	1
hsa-miR-27a-3p	-0.0753	0.0716	8.3	1
hsa-miR-29c-5p	0.0701	-0.0666	8.6	1
hsa-miR-125a-5p	0.0693	-0.0659	8.8	1
hsa-miR-24-2-5p	-0.0661	0.0628	9.5	1
hsa-miR-30d-5p	0.0638	-0.0606	9.8	1
hsa-miR-95-3p	0.0653	-0.062	9.9	1
hsa-miR-508-3p	0.0586	-0.0557	10.9	1
hsa-miR-100-5p	0.0517	-0.0491	12.2	1
hsa-miR-509-3p	0.0495	-0.047	13	1
hsa-miR-200a-3p	0.0439	-0.0417	13.4	1
hsa-miR-1180-3p	0.0416	-0.0395	14	1
hsa-miR-497-5p	0.0359	-0.0341	14.6	1
hsa-miR-193a-5p	0.0154	-0.0147	19.2	0.9
hsa-miR-125b-5p	0.0083	-0.0079	19.6	0.6
Epithelioid-only dataset
Good iCluster 1 (n=14) vs Poor iCluster 1 (n=15)
CV classification accuracy:			0.83
name	1-score	4-score	av-rank-in-CV	prop-selected-in-CV
hsa-miR-29b-2-5p	0.1992	-0.1859	1	1
hsa-miR-29c-3p	0.1339	-0.125	2.5	1
hsa-miR-30d-5p	0.0999	-0.0933	4.3	1
hsa-miR-148b-3p	0.0939	-0.0876	4.4	1
hsa-miR-203a	0.0715	-0.0667	7.6	1
hsa-miR-23a-3p	-0.0648	0.0605	8.2	1
hsa-miR-29c-5p	0.0557	-0.052	9.8	1
hsa-miR-24-2-5p	-0.0493	0.046	10.8	1
hsa-miR-101-5p	0.0392	-0.0366	12.6	1
hsa-miR-361-3p	0.0416	-0.0389	12.9	1
hsa-miR-200a-3p	0.0343	-0.032	13.4	1
hsa-miR-508-3p	0.0344	-0.0321	14.1	1
hsa-miR-193a-3p	0.0285	-0.0266	14.2	0.9
hsa-miR-101-3p	0.0243	-0.0227	15.5	0.9
hsa-miR-130a-3p	0.0173	-0.0161	17.8	0.8
hsa-miR-100-5p	0.0127	-0.0118	18.4	0.7
hsa-miR-125a-5p	0.0121	-0.0113	20.5	0.7
hsa-miR-30d-3p	0.0048	-0.0045	20.7	0.7
hsa-miR-509-3p	0.0035	-0.0033	21.6	0.5
hsa-miR-1180-3p	0.0022	-0.0021	21.7	0.6

## Sheet: 4G_iClust.combined.classifier
Full dataset
Good iCluster 1 (n=19) vs Poor iCluster 4 (n=20)
CV classification accuracy:			1
name	1-score	4-score	av-rank-in-CV	prop-selected-in-CV
cg06946797	0.0776	-0.0738	2.3	1
cg07754940	0.0638	-0.0606	4.8	1
cg21502476	0.0636	-0.0604	4.8	1
cg03577157	0.0601	-0.0571	4.9	1
cg25388800	0.0584	-0.0555	5.7	1
ODZ2	-0.0523	0.0497	6.4	1
DHODH	0.0443	-0.0421	7.9	1
cg23019886	0.0371	-0.0352	9.4	1
cg24635971	0.0334	-0.0318	10.1	1
cg21695727	-0.031	0.0295	10.5	1
EPHB6	0.0242	-0.023	12.3	0.9
NFE2	0.0192	-0.0182	14.2	0.7
cg14020652	0.0077	-0.0073	17.9	0.6
RCHY1	0.0121	-0.0115	18.1	0.6
LAYN	-0.0045	0.0043	19.5	0.6
Epithelioid-only dataset
Good iCluster 1 (n=14) vs Poor iCluster 1 (n=15)
CV classification accuracy:			0.97
name	1-score	4-score	av-rank-in-CV	prop-selected-in-CV
DST	-0.0791	0.0738	4.9	1
LOXL2	-0.0725	0.0677	6	1
cg09663343	0.0623	-0.0581	7.7	1
SMURF2	-0.0538	0.0502	8.6	1
FN1	-0.0567	0.0529	9	1
cg09988805	0.0587	-0.0548	9.3	1
KIF23	-0.0526	0.0491	9.9	1
cg25913882	0.0537	-0.0501	12	1
MAST2	-0.0476	0.0444	13	1
ANLN	-0.0368	0.0343	15.7	1
COL5A2	-0.0342	0.032	17.3	1
cg25840173	0.0314	-0.0293	18.5	1
PRC1	-0.0277	0.0258	19.8	1
ORC1L	-0.0249	0.0232	20.3	1
C15orf42	-0.0218	0.0203	22.6	0.9
DHODH	0.0256	-0.0238	22.8	1
CEP55	-0.0204	0.019	26.2	1
GPC6	-0.0161	0.0151	26.5	1
KIF3C	-0.0178	0.0166	28.1	0.9
MFAP5	-0.0148	0.0138	30.6	1
ADAMTS5	-0.0167	0.0156	30.8	0.9
THBS2	-0.0168	0.0156	31.3	1
OSBPL3	-0.0156	0.0145	31.3	0.8
TGFB1I1	-0.0174	0.0163	31.4	0.9
FAM40B	-0.0084	0.0078	33.4	0.7
GJC1	-0.0162	0.0151	35.4	0.9
PLXND1	-0.0066	0.0062	40.6	0.8
cg01291854	0.0001	-0.0001	47.1	0.4
