# Supplementary material for: Integrative Molecular Characterization of Malignant Pleural Mesothelioma
Source: Oxford University Press journal article supplement (doi:10.1158/2159-8290.cd-18-0804), 2018-10-15
Supplement: 21598290cd180804-sup-205173_2_supp_5073243_pggmgr.xlsx [file 21598290cd180804-sup-205173_2_supp_5073243_pggmgr.xlsx]

## Sheet: S5A README
'07 April 2017
Gordon Robertson, BC Cancer Agency, Vancouver BC Canada
Table S4A: miRNA mature strands and lncRNAs that were statistically associated with RNA-seq-based EMT scores in TCGA data (n=74).
Worksheets
S4A.1	lncRNAs	Results (FDR < 0.05) for lncRNAs
S4A.2	miRNA mature strands	Results (FDR < 0.05) for miRNA mature strands
Worksheet columns
lncRNA or miRNA mature strand	Ensembl v82 lncRNA, or miRNA mature strand (v16 miRBase with v20 names)
biotype	Ensembl v82 biotype for lncRNAs (lncRNA or processed_transcript)
ENSG	Ensembl v82 ENSG
cytoband	Location(s) from which the lncRNA or miRNA mature strand can be expressed
Spearman rho	Spearman correlation coefficient
FDR	False discovery rate, thresholded at 0.05.
mean.FPKM, mean.RPM	Mean abundance across the n=74 cohort

## Sheet: S5A.1 LncRNA
lncRNA	biotype	ENSG	cytoband	Spearman rho	FDR	mean.FPKM
LINC01105	processed_transcript	ENSG00000232044	2p25.2	-0.658526	7.32305e-08	7.618
AC034220.3	processed_transcript	ENSG00000233006	5q31.1	-0.652869	8.44972e-08	4.471
RP11-89H19.2	lincRNA	ENSG00000278385	12q13.11	-0.641673	1.45638e-07	0.363
C10orf95	lincRNA	ENSG00000120055	10q24.32	-0.600089	1.74069e-06	0.21
RP4-625H18.2	lincRNA	ENSG00000228412	6p22.3	-0.578645	5.53383e-06	1.927
RPARP-AS1	processed_transcript	ENSG00000269609	10q24.32	-0.570411	8.51348e-06	6.438
RP11-79N23.1	lincRNA	ENSG00000227885	6p12.1	-0.555468	1.8883e-05	0.697
TINCR	lincRNA	ENSG00000223573	19p13.3	-0.555335	1.8883e-05	1.644
RP11-554I8.2	lincRNA	ENSG00000223784	10p14	-0.554461	1.91475e-05	1.949
RP11-353N14.4	lincRNA	ENSG00000262188	17q25.3	-0.550922	2.26456e-05	0.841
IQCH-AS1	lincRNA	ENSG00000259673	15q23	-0.546242	2.78835e-05	1.587
RP11-359M6.1	lincRNA	ENSG00000257474	12q21.2	-0.543428	3.07226e-05	12.096
LINC00885	lincRNA	ENSG00000224652	3q29	-0.54171	3.21392e-05	1.282
KLF3-AS1	processed_transcript	ENSG00000231160	4p14	-0.539993	3.35066e-05	1.514
RP11-727A23.5	processed_transcript	ENSG00000247137	11q14.1	-0.53789	3.5156e-05	2.919
RP11-890B15.3	lincRNA	ENSG00000255455	11q24.3	-0.537564	3.5156e-05	3.268
LINC01550	lincRNA	ENSG00000246223	14q32.2	-0.536024	3.6288e-05	4.504
RP11-689K5.3	lincRNA	ENSG00000251331	4q21.22	-0.53595	3.35066e-05	0.592
CTC-559E9.1	lincRNA	ENSG00000266904	19p13.11	-0.534928	3.6288e-05	3.284
LINC00940	lincRNA	ENSG00000235049	12p13.33	-0.53284	3.95569e-05	0.577
PCAT1	lincRNA	ENSG00000253438	8q24.21	-0.531196	4.24618e-05	0.228
RP5-1057J7.7	lincRNA	ENSG00000271420	1p36.12	-0.527108	5.07694e-05	0.629
AC083843.1	lincRNA	ENSG00000259820	8q24.22	-0.515824	8.74052e-05	0.534
AC007405.4	lincRNA	ENSG00000234350	2q31.1	-0.514165	9.34087e-05	0.46
RP11-399K21.14	lincRNA	ENSG00000272692	10q22.2	-0.513247	9.62064e-05	0.227
MTHFS	lincRNA	ENSG00000261229	15q25.1	-0.507856	0.000118083	0.382
CTD-2270P14.1	processed_transcript	ENSG00000260565	16p13.3	-0.506879	0.000121977	1.904
RP11-420A23.1	lincRNA	ENSG00000251432	4q28.2	-0.506227	0.00012395	0.817
RP1-78O14.1	lincRNA	ENSG00000257894	12q21.2	-0.504421	0.000127206	11.36
LA16c-325D7.2	lincRNA	ENSG00000263280	16p13.3	-0.503295	0.000132506	0.622
RP11-295H24.4	lincRNA	ENSG00000275580	15q21.2	-0.501548	0.000142457	2.288
RP11-429O1.1	lincRNA	ENSG00000263317	17q22	-0.500392	3.21392e-05	0.233
ATP1A1-AS1	processed_transcript	ENSG00000203865	1p13.1	-0.499889	0.000150137	1.391
RP11-74M11.2	lincRNA	ENSG00000248300	4p15.33	-0.498112	5.0851e-05	0.27
LINC00886	lincRNA	ENSG00000240875	3q25.31	-0.496216	0.000174859	0.838
RP11-263K4.5	lincRNA	ENSG00000258170	12q21.31	-0.495876	0.000127206	14.124
RP11-357D18.1	processed_transcript	ENSG00000250978	5q13.1	-0.494854	0.000174957	1.263
SRP14-AS1	lincRNA	ENSG00000248508	15q15.1	-0.494291	0.000184179	2.311
TMEM191C	lincRNA	ENSG00000206140	22q11.21	-0.489197	0.000228687	0.46
RP11-196G18.24	lincRNA	ENSG00000272993	1q21.2	-0.487656	0.000238983	3.396
FAM83H-AS1	lincRNA	ENSG00000203499	8q24.3	-0.486146	0.000251982	1.966
SPATA41	lincRNA	ENSG00000189419	15q26.3	-0.485287	0.000259182	0.499
CH17-360D5.2	lincRNA	ENSG00000276850	10q11.22	-0.48425	0.000267706	21.024
OIP5-AS1	processed_transcript	ENSG00000247556	15q15.1	-0.480074	0.000315478	20.034
RP11-19E11.1	lincRNA	ENSG00000258910	2q14.2	-0.479156	0.000325388	3.722
LINC01186	lincRNA	ENSG00000236751	Xp11.3	-0.478786	0.000327106	0.762
AC017104.6	processed_transcript	ENSG00000224376	2q37.1	-0.478386	0.000329435	7.924
RP11-110I1.12	lincRNA	ENSG00000255121	11q23.3	-0.476283	0.000350957	0.699
CTD-2227E11.1	lincRNA	ENSG00000270933	7p15.2	-0.475809	0.000354741	2.546
RP11-215H22.1	lincRNA	ENSG00000261340	11p14.1	-0.474432	0.000356875	0.292
TRAM2-AS1	lincRNA	ENSG00000225791	6p12.2	-0.472403	0.00039619	3.509
ZRANB2-AS2	processed_transcript	ENSG00000229956	1p31.1	-0.47181	0.000399552	0.986
AC007405.6	lincRNA	ENSG00000239467	2q31.1	-0.469915	0.000431029	2.094
RP11-433J8.1	lincRNA	ENSG00000258702	14q32.2	-0.469382	0.000433265	0.151
RP11-352M15.2	lincRNA	ENSG00000273015	12q12	-0.469056	0.000433265	1.662
RP11-102N12.3	lincRNA	ENSG00000273472	4q31.21	-0.468908	0.000433265	0.883
XXbac-BPG27H4.8	lincRNA	ENSG00000237923	6p21.33	-0.467131	0.000350957	0.128
LINC00689	processed_transcript	ENSG00000231419	7q36.3	-0.464524	0.000497901	1.322
RP11-473M20.16	lincRNA	ENSG00000261889	16p13.3	-0.463754	0.000510499	0.647
RP11-338K17.8	lincRNA	ENSG00000255839	12q24.31	-0.462718	0.000529642	1.74
LINC00113	lincRNA	ENSG00000225298	21q21.3	-0.460348	0.000481666	1.265
RP11-259O2.1	lincRNA	ENSG00000248994	5p15.33	-0.459637	0.000590837	0.234
RP1-257A7.5	lincRNA	ENSG00000272379	6p24.1	-0.459163	0.000597558	9.802
RP11-347C12.10	lincRNA	ENSG00000260219	16p11.2	-0.453476	0.000745291	2.846
LINC01465	lincRNA	ENSG00000221949	12q14.1	-0.451581	0.000796817	0.599
RP11-77H9.8	lincRNA	ENSG00000260979	16p13.2	-0.450278	0.000730966	0.174
AC067959.1	lincRNA	ENSG00000233005	2p24.1	-0.450115	0.000838943	4.097
RP11-571L19.8	lincRNA	ENSG00000272777	4q23	-0.447671	0.000923044	1.235
BAIAP2-AS1	lincRNA	ENSG00000226137	17q25.3	-0.444946	0.00102676	4.842
RP11-53O19.3	lincRNA	ENSG00000272335	5p12	-0.443406	0.00108613	5.688
AC005532.5	processed_transcript	ENSG00000230825	7p21.3	-0.442903	0.00109177	0.29
LINC01569	lincRNA	ENSG00000262468	16p13.3	-0.442073	0.00111385	1.811
LINC01515	lincRNA	ENSG00000228065	10q21.3	-0.441984	0.00111385	4.041
RP11-434E6.4	lincRNA	ENSG00000277559	16q12.2	-0.441955	0.00111385	1.294
RP11-30K9.6	lincRNA	ENSG00000245975	15q21.3	-0.441836	0.00111385	0.94
SNHG20	processed_transcript	ENSG00000234912	17q25.2	-0.434047	0.00148664	4.565
LINC00665	lincRNA	ENSG00000232677	19q13.12	-0.431677	0.00161138	11.649
C15orf56	processed_transcript	ENSG00000176753	15q15.1	-0.431351	0.00161629	0.222
RP11-276H19.1	lincRNA	ENSG00000226237	9q21.33	-0.430789	0.00164523	0.615
RP11-435O5.2	lincRNA	ENSG00000237857	9q22.32	-0.430107	0.00167835	0.624
RP1-178F15.5	processed_transcript	ENSG00000271853	1q21.3	-0.429574	0.00170203	2.861
CTD-2410N18.3	lincRNA	ENSG00000270177	5q31.1	-0.4291	0.00170961	0.319
LINC00471	lincRNA	ENSG00000181798	2q37.1	-0.427412	0.00180473	0.312
CTD-2270P14.5	lincRNA	ENSG00000276791	16p13.3	-0.427353	0.00180473	0.323
LINC00106	lincRNA	ENSG00000236871	Xp22.33	-0.427027	0.00180473	1.614
CTD-2600O9.1	lincRNA	ENSG00000187185	16q21	-0.424746	0.00196127	2.403
LINC00857	lincRNA	ENSG00000237523	10q22.3	-0.423769	0.00201022	2.672
TMEM191A	processed_transcript	ENSG00000226287	22q11.21	-0.423206	0.00204112	4.159
LINC00707	lincRNA	ENSG00000238266	10p14	-0.42137	0.00213493	0.999
RP11-379F4.7	lincRNA	ENSG00000272087	3q25.32	-0.419504	0.0022655	13.853
AP000705.7	lincRNA	ENSG00000226043	21q21.1	-0.419474	0.00209435	0.569
RP11-535A5.1	lincRNA	ENSG00000273348	18q11.2	-0.418912	0.00227542	0.885
AP000230.1	lincRNA	ENSG00000273492	21q21.3	-0.418882	0.00227542	0.177
RP11-263K4.3	lincRNA	ENSG00000257431	12q21.31	-0.418438	0.00206046	0.329
RP11-273G15.2	lincRNA	ENSG00000247317	8q24.3	-0.417993	0.00234055	2.226
CTC-573N18.1	lincRNA	ENSG00000250509	5q35.3	-0.417194	0.00239822	3.074
RP11-486O12.2	lincRNA	ENSG00000247373	12q24.31	-0.416897	0.00241072	0.287
CRHR1-IT1	processed_transcript	ENSG00000204650	17q21.31	-0.415831	0.00248567	9.049
LINC00887	lincRNA	ENSG00000214145	3q29	-0.415609	0.00248567	0.907
RP11-141J13.5	lincRNA	ENSG00000261863	17p13.2	-0.414943	0.00248567	0.186
RP11-723O4.9	lincRNA	ENSG00000261159	3q21.3	-0.414795	0.00253966	0.597
C1orf132	lincRNA	ENSG00000203709	1q32.2	-0.414558	0.00254085	0.433
TOB1-AS1	processed_transcript	ENSG00000229980	17q21.33	-0.414084	0.0025716	0.97
LINC01016	lincRNA	ENSG00000249346	6p21.31	-0.41361	0.00253966	0.28
AP001462.6	lincRNA	ENSG00000269038	11q13.1	-0.413225	0.00260866	0.366
RP1-80N2.3	lincRNA	ENSG00000261211	6p25.1	-0.412751	0.00262618	0.252
RP11-465B22.8	lincRNA	ENSG00000272141	1p36.33	-0.410396	0.00281032	0.148
RP11-736K20.6	lincRNA	ENSG00000246523	11q14.2	-0.4097	0.00287951	1.015
CTC-523E23.1	lincRNA	ENSG00000261754	19q13.11	-0.409404	0.00289518	0.502
RP11-120K24.3	lincRNA	ENSG00000267868	13q34	-0.409137	0.00290117	0.253
LINC00174	lincRNA	ENSG00000179406	7q11.21	-0.408071	0.00300926	1.94
RP11-121C2.2	lincRNA	ENSG00000259959	4p12	-0.405109	0.0032682	0.602
RP11-480A16.1	lincRNA	ENSG00000260261	3q29	-0.404339	0.0033296	0.333
RP3-406A7.7	lincRNA	ENSG00000260418	6q23.3	-0.40431	0.0033296	0.984
RP11-20B7.1	lincRNA	ENSG00000242741	3p13	-0.403895	0.00305729	0.157
AC124789.1	processed_transcript	ENSG00000276170	17q12	-0.402977	0.00347894	28.568
RP5-890E16.2	processed_transcript	ENSG00000263412	17q21.32	-0.401644	0.00361084	0.44
RP11-817O13.8	lincRNA	ENSG00000260274	15q24.2	-0.401377	0.00361084	1.19
LINC01239	lincRNA	ENSG00000234840	9p21.3	-0.401037	0.00361084	0.305
LINC01133	lincRNA	ENSG00000224259	1q23.2	-0.4004	0.00370408	33.18
RP11-1007O24.3	lincRNA	ENSG00000261423	15q24.1	-0.399363	0.00376822	0.472
RP4-717I23.3	processed_transcript	ENSG00000223745	1p22.1	-0.398741	0.00383483	7.502
RP11-128A17.2	lincRNA	ENSG00000274444	15q14	-0.39809	0.00388342	1.177
RP11-320N7.2	lincRNA	ENSG00000256969	12p13.32	-0.396638	0.00361084	0.766
PAXIP1-AS1	lincRNA	ENSG00000273344	7q36.2	-0.395987	0.0041559	3.314
AC096772.6	lincRNA	ENSG00000244567	2q33.3	-0.395927	0.0041559	3.139
RP11-134K13.4	lincRNA	ENSG00000271967	6q13	-0.395424	0.0041559	0.405
RP11-112J3.16	lincRNA	ENSG00000227388	9p13.3	-0.395335	0.0041559	1.075
RP3-465N24.6	lincRNA	ENSG00000272432	1p36.11	-0.395276	0.0041559	0.384
TPTEP1	lincRNA	ENSG00000100181	22q11.1	-0.394002	0.00430871	9.037
RP11-567G11.1	lincRNA	ENSG00000228952	3q27.3	-0.392536	0.0041559	1.424
AC010894.3	lincRNA	ENSG00000226853	2q31.1	-0.391514	0.00466343	2.455
DNAJC3-AS1	lincRNA	ENSG00000247400	13q32.1	-0.390981	0.00472995	0.716
RP11-458F8.4	lincRNA	ENSG00000273142	7q11.21	-0.389086	0.00501019	3.147
RP11-338N10.2	lincRNA	ENSG00000270035	1p36.23	-0.388375	0.00502831	0.204
RP11-71E19.1	lincRNA	ENSG00000250934	3q21.3	-0.388182	0.00508055	0.953
RP11-67L2.2	lincRNA	ENSG00000273033	3q21.1	-0.387753	0.0051538	2.786
RP11-353K11.1	lincRNA	ENSG00000273265	2q11.2	-0.386449	0.0053697	0.443
RP11-758H9.2	lincRNA	ENSG00000273702	17q23.1	-0.386242	0.00538404	1.05
LINC01355	lincRNA	ENSG00000261326	1p36.12	-0.385235	0.00549682	1.364
RP11-844P9.2	lincRNA	ENSG00000248596	5q35.2	-0.385176	0.00549682	0.584
LINC00957	lincRNA	ENSG00000235314	7p13	-0.384939	0.00550845	1.514
bP-21264C1.2	lincRNA	ENSG00000278932	21p11.2	-0.38405	0.00565585	4.32
SEPT7-AS1	lincRNA	ENSG00000228878	7p14.2	-0.382066	0.00597442	0.362
RP11-303E16.8	processed_transcript	ENSG00000260643	16q23.2	-0.382036	0.00597442	1.299
RP11-295M3.4	lincRNA	ENSG00000277639	16q12.2	-0.381888	0.00597442	1.876
RP11-448A19.1	lincRNA	ENSG00000273329	7q32.2	-0.379993	0.00625454	0.36
RP11-394I13.2	lincRNA	ENSG00000271151	2q31.1	-0.378245	0.00658287	0.314
RP11-326I11.3	lincRNA	ENSG00000271646	4q35.1	-0.377979	0.00660034	1.034
RP11-1109F11.3	lincRNA	ENSG00000271327	12q21.33	-0.375846	0.00693535	0.487
EIF1B-AS1	processed_transcript	ENSG00000280739	3p22.1	-0.373773	0.00730888	0.767
AC016700.5	lincRNA	ENSG00000231327	2p13.3	-0.373684	0.00730888	0.782
RP11-278L15.2	lincRNA	ENSG00000243885	3q25.1	-0.371922	0.00694791	0.174
FGF14-AS2	lincRNA	ENSG00000272143	13q33.1	-0.371137	0.00786343	1.365
GMDS-AS1	lincRNA	ENSG00000250903	6p25.3	-0.370722	0.00790966	4.256
LINC00518	lincRNA	ENSG00000183674	6p24.3	-0.370307	0.00693535	0.147
RP11-675F6.3	lincRNA	ENSG00000253361	8p11.22	-0.369981	0.00439691	0.225
RP4-758J18.2	processed_transcript	ENSG00000224870	1p36.33	-0.369685	0.0081224	9.282
LINC01270	lincRNA	ENSG00000203999	20q13.13	-0.369448	0.00815444	0.586
RP4-761J14.10	lincRNA	ENSG00000269892	12p13.31	-0.368352	0.00838977	0.869
RP11-504P24.8	lincRNA	ENSG00000272645	1q42.11	-0.367967	0.00846419	2.799
RP11-77P16.4	lincRNA	ENSG00000249846	3q22.1	-0.366457	0.00871078	0.388
RP11-441O15.3	lincRNA	ENSG00000224934	10q24.2	-0.366398	0.00871078	0.329
SAMD12-AS1	lincRNA	ENSG00000281641	8q24.12	-0.366116	0.00871078	0.229
RP11-88E10.5	lincRNA	ENSG00000274922	13q34	-0.365361	0.00897768	0.681
RP11-37B2.1	lincRNA	ENSG00000251136	8q21.3	-0.365154	0.00900487	4.853
RP5-902P8.10	lincRNA	ENSG00000230415	1p36.33	-0.364709	0.00910234	1.47
RP11-23D24.2	processed_transcript	ENSG00000238755	3q25.2	-0.364043	0.00925948	1.586
RP3-329A5.8	lincRNA	ENSG00000272374	6p21.31	-0.363406	0.00942651	0.327
RP11-1007O24.2	lincRNA	ENSG00000261187	15q24.1	-0.362547	0.0095956	0.368
PWAR6	lincRNA	ENSG00000257151	15q11.2	-0.362518	0.0095956	1.609
RP11-480D4.6	lincRNA	ENSG00000272049	5p15.31	-0.361881	0.0095956	0.203
AP001258.4	lincRNA	ENSG00000245571	11q12.1	-0.361807	0.00978307	3.116
AC011752.1	lincRNA	ENSG00000231204	2p24.1	-0.360385	0.0079236	0.205
LINC00969	lincRNA	ENSG00000242086	3q29	-0.359852	0.0102755	10.066
C8orf37-AS1	lincRNA	ENSG00000253773	8q22.1	-0.359822	0.0102755	5.621
RP11-141M3.6	processed_transcript	ENSG00000273328	3p22.1	-0.35926	0.0103841	0.703
CTD-3157E16.2	lincRNA	ENSG00000276855	17p12	-0.358963	0.0104163	12.444
RP11-1094H24.4	lincRNA	ENSG00000246640	17q21.33	-0.356446	0.0112476	0.267
MALAT1	lincRNA	ENSG00000251562	11q13.1	-0.356268	0.0112715	60.939
RP11-15H20.6	processed_transcript	ENSG00000213971	19p12	-0.355528	0.0114587	4.742
RP11-806O11.1	processed_transcript	ENSG00000253671	8p22	-0.355217	0.0114538	0.314
RP11-474O21.5	lincRNA	ENSG00000272482	1p36.21	-0.354876	0.0115902	2.707
LINC01123	lincRNA	ENSG00000204588	2q13	-0.354728	0.0115902	0.396
RP11-18H7.1	lincRNA	ENSG00000242622	3q13.33	-0.352803	0.0122306	0.531
CTC-523E23.4	lincRNA	ENSG00000267767	19q13.11	-0.352107	0.012457	0.262
LINC01139	lincRNA	ENSG00000215808	1q43	-0.351233	0.0126736	9.455
RP11-1275H24.1	lincRNA	ENSG00000234432	7p22.1	-0.350789	0.0127644	0.597
CTD-2517M22.14	processed_transcript	ENSG00000255182	8q24.3	-0.350374	0.0128873	0.777
RP11-538D16.2	lincRNA	ENSG00000224810	1q25.3	-0.349678	0.0126297	0.141
RP11-490M8.1	lincRNA	ENSG00000260025	2p22.2	-0.349574	0.0130809	18.409
AC068831.16	lincRNA	ENSG00000278514	15q26.1	-0.349545	0.0127219	0.287
RP1-290I10.5	lincRNA	ENSG00000231056	6p24.3	-0.348686	0.0115902	1.051
SLC25A5-AS1	processed_transcript	ENSG00000224281	Xq24	-0.347856	0.013616	0.444
MGC39584	lincRNA	ENSG00000280081	21p11.2	-0.347471	0.00603664	0.23
RP13-977J11.8	lincRNA	ENSG00000256312	12q24.33	-0.347146	0.013616	0.24
RP11-499E18.1	lincRNA	ENSG00000248161	4q24	-0.346701	0.0140261	4.999
RP1-137D17.2	lincRNA	ENSG00000272848	6q27	-0.345694	0.0142284	1.902
RP11-21B23.2	lincRNA	ENSG00000261092	16q12.1	-0.343103	0.00539454	0.252
LINC01106	lincRNA	ENSG00000175772	2q13	-0.343088	0.0151663	0.326
RP4-737E23.2	lincRNA	ENSG00000230387	20p11.21	-0.34217	0.015388	0.231
LINC00221	lincRNA	ENSG00000270816	14q32.33	-0.342066	0.013616	0.295
LINC00648	lincRNA	ENSG00000259129	14q21.3	-0.342051	0.015388	0.267
RP11-200A1.1	lincRNA	ENSG00000240006	3q22.2	-0.341755	0.0150294	0.463
RP11-403A21.1	lincRNA	ENSG00000265752	18q11.2	-0.340733	0.015926	0.18
RP11-367J11.3	lincRNA	ENSG00000245468	4p16.1	-0.33983	0.0162783	0.369
RP11-713P17.3	lincRNA	ENSG00000204241	11q25	-0.339	0.0165881	0.637
CTD-3154N5.2	lincRNA	ENSG00000275527	15q24.1	-0.335683	0.0179888	0.245
RP11-344N10.5	lincRNA	ENSG00000272630	10q22.2	-0.335387	0.0180938	0.339
RP11-626G11.6	lincRNA	ENSG00000278389	16p12.3	-0.334528	0.0184924	1.689
CH17-360D5.3	lincRNA	ENSG00000273760	10q11.22	-0.333965	0.0185898	4.081
LINC00271	lincRNA	ENSG00000231028	6q23.3	-0.333876	0.0185898	0.42
RP11-638I8.1	lincRNA	ENSG00000272556	7p12.3	-0.332958	0.0189343	2.138
RP11-863P13.5	lincRNA	ENSG00000261193	16q24.2	-0.332869	0.0189231	0.369
RP11-297J22.1	lincRNA	ENSG00000271709	2q14.2	-0.331922	0.0193522	6.044
RP11-421M1.8	lincRNA	ENSG00000272097	6p24.2	-0.331181	0.019664	0.375
AC142472.6	lincRNA	ENSG00000276728	17q21.31	-0.330766	0.0197911	0.852
RP4-736H5.3	lincRNA	ENSG00000233423	7q11.22	-0.32967	0.0193522	0.954
RP11-435O5.7	lincRNA	ENSG00000271384	9q22.32	-0.329226	0.0203515	0.167
DLG5-AS1	processed_transcript	ENSG00000233871	10q22.3	-0.329078	0.0205566	1.02
SMC2-AS1	lincRNA	ENSG00000270332	9q31.1	-0.328575	0.0207954	0.411
AC093627.9	lincRNA	ENSG00000242474	7p22.3	-0.327479	0.0214128	0.573
RP11-290F24.6	lincRNA	ENSG00000267940	11p15.4	-0.326916	0.0216432	0.612
WDFY3-AS2	processed_transcript	ENSG00000180769	4q21.23	-0.325909	0.0219758	0.709
RP11-1038A11.3	lincRNA	ENSG00000256417	12p13.32	-0.325568	0.0129453	0.309
RP11-529K1.2	processed_transcript	ENSG00000261777	16q22.1	-0.324902	0.0224331	0.411
RP11-414C23.1	lincRNA	ENSG00000278847	Yp11.2	-0.324354	0.0217085	0.492
SNHG14	processed_transcript	ENSG00000224078	15q11.2	-0.323125	0.0233535	11.969
AC061992.2	lincRNA	ENSG00000267737	17q25.3	-0.322621	0.0235644	0.423
LINC00473	lincRNA	ENSG00000223414	6q27	-0.322503	0.023581	2.016
CTD-2547G23.4	lincRNA	ENSG00000274925	16p12.1	-0.321881	0.0238746	0.698
LINC01489	lincRNA	ENSG00000255727	12p12.3	-0.321762	0.0235644	0.242
RP11-276H19.2	lincRNA	ENSG00000269994	9q21.33	-0.321733	0.0238795	1.224
RP11-439C15.4	lincRNA	ENSG00000253764	8p23.3	-0.321585	0.0238719	0.516
TP53TG1	lincRNA	ENSG00000182165	7q21.12	-0.321496	0.0239868	26.346
USP27X-AS1	lincRNA	ENSG00000234390	Xp11.23	-0.321437	0.0239868	0.451
RP11-432J24.5	lincRNA	ENSG00000226900	10q26.3	-0.319748	0.0248286	0.739
C1orf229	lincRNA	ENSG00000221953	1q44	-0.319659	0.0250261	0.251
LINC00910	lincRNA	ENSG00000188825	17q21.31	-0.319422	0.025063	0.819
RP11-445N20.3	lincRNA	ENSG00000273293	7q36.1	-0.319245	0.0214747	0.382
RP11-86H7.7	lincRNA	ENSG00000235565	1p21.3	-0.317616	0.0262298	0.299
RP11-131L12.4	lincRNA	ENSG00000275409	12q24.23	-0.317527	0.0262298	0.559
RP11-548P2.2	lincRNA	ENSG00000272564	2p11.2	-0.316964	0.0265095	0.594
AC008088.4	lincRNA	ENSG00000260907	17p11.2	-0.316579	0.0266247	0.512
RP11-672L10.2	processed_transcript	ENSG00000265179	18p11.32	-0.316387	0.0266957	1.965
LA16c-313D11.12	processed_transcript	ENSG00000261659	16p13.3	-0.316283	0.0266957	0.472
RP11-188D8.1	lincRNA	ENSG00000271427	1p12	-0.316224	0.0266957	0.462
RP4-769N13.6	processed_transcript	ENSG00000271147	Xq22.1	-0.315572	0.0270733	4.563
LA16c-359F1.1	lincRNA	ENSG00000276984	16p13.3	-0.314654	0.025063	0.269
RP11-79P5.9	lincRNA	ENSG00000272525	5q13.2	-0.314565	0.027702	0.888
LINC00993	lincRNA	ENSG00000235687	10p11.21	-0.313973	0.0193522	0.73
RAD51-AS1	processed_transcript	ENSG00000245849	15q15.1	-0.313439	0.0283551	1.996
AC016747.3	processed_transcript	ENSG00000212978	2p15	-0.31338	0.0283551	6.814
RP4-669P10.20	lincRNA	ENSG00000281538	22q13.2	-0.313291	0.0283551	0.346
RP11-119D9.1	lincRNA	ENSG00000251637	11q13.2	-0.313143	0.0283551	0.417
RP11-440D17.3	lincRNA	ENSG00000272913	2q11.1	-0.312195	0.028995	4.442
EIF3J-AS1	lincRNA	ENSG00000179523	15q21.1	-0.311633	0.029375	3.316
POLR2J4	processed_transcript	ENSG00000214783	7p13	-0.311129	0.0295825	1.175
LINC01126	lincRNA	ENSG00000279873	2p21	-0.310744	0.0296636	0.275
LINC00930	lincRNA	ENSG00000258647	15q26.1	-0.310685	0.0295825	0.203
LINC00424	lincRNA	ENSG00000226722	13q12.11	-0.310685	0.0265301	0.179
AJ011932.1	lincRNA	ENSG00000274248	21q22.3	-0.310537	0.0297606	2.152
RP11-680C21.1	lincRNA	ENSG00000264727	17p12	-0.310404	0.0287009	0.12
RP11-114M1.1	lincRNA	ENSG00000228561	3q26.32	-0.310181	0.0295825	0.449
RP11-134G8.5	lincRNA	ENSG00000223396	1q32.1	-0.309263	0.0305458	0.444
RP11-834C11.4	lincRNA	ENSG00000250742	12q13.13	-0.309204	0.0305458	12.588
RP11-321A17.6	lincRNA	ENSG00000276995	17q11.2	-0.308464	0.0310435	0.585
AC099668.5	processed_transcript	ENSG00000259970	3p21.31	-0.307338	0.0319303	0.442
RP11-502I4.3	lincRNA	ENSG00000270964	15q23	-0.30716	0.03198	0.432
AP000295.10	lincRNA	ENSG00000272659	21q22.11	-0.307012	0.03198	0.631
XXbac-BPGBPG55C20.2	lincRNA	ENSG00000272316	6p11.2	-0.306835	0.03198	0.281
RP5-1068E13.7	lincRNA	ENSG00000273148	20p11.23	-0.306805	0.03198	0.949
RP11-164J13.1	processed_transcript	ENSG00000258461	15q15.1	-0.306242	0.0323538	0.686
CTC-526N19.1	lincRNA	ENSG00000277013	19q13.11	-0.306094	0.0324078	0.862
RP11-10C24.3	lincRNA	ENSG00000271643	3p22.3	-0.30331	0.034681	1.525
CTD-2012K14.6	lincRNA	ENSG00000261386	16q22.1	-0.303191	0.0347024	0.489
RP11-88H9.2	lincRNA	ENSG00000231437	1p13.2	-0.302244	0.0355175	0.673
RP11-424G14.1	lincRNA	ENSG00000260197	Yq11.223	-0.300615	0.0359983	0.74
LINC00950	lincRNA	ENSG00000281205	9p13.3	-0.300615	0.0366662	0.213
DPH6-AS1	lincRNA	ENSG00000248079	15q14	-0.299341	0.0377496	1.822
RP11-95I16.6	lincRNA	ENSG00000278484	10q26.12	-0.299237	0.0275247	0.164
RP11-66N24.4	processed_transcript	ENSG00000157306	14q11.2	-0.29866	0.038174	1.503
RP11-384F7.2	lincRNA	ENSG00000239268	3q13.32	-0.298541	0.0356618	0.355
CTC-523E23.11	lincRNA	ENSG00000271109	19q13.11	-0.298275	0.0384737	0.888
RP11-526I2.5	lincRNA	ENSG00000270127	15q26.3	-0.297919	0.0387499	0.837
LINC00240	lincRNA	ENSG00000224843	6p22.2	-0.297564	0.0388653	2.144
OXCT1-AS1	processed_transcript	ENSG00000248668	5p13.1	-0.297416	0.0388653	0.651
UBAC2-AS1	lincRNA	ENSG00000228889	13q32.3	-0.297357	0.0388653	0.472
LINC01376	lincRNA	ENSG00000236204	2p24.1	-0.297297	0.0388653	0.403
RFX3-AS1	lincRNA	ENSG00000232104	9p24.2	-0.297208	0.03887	0.432
RP3-471C18.2	lincRNA	ENSG00000237404	6p22.3	-0.297001	0.019664	0.454
GLIS2-AS1	lincRNA	ENSG00000262686	16p13.3	-0.297001	0.0381069	0.193
RP11-1109F11.5	lincRNA	ENSG00000271259	12q21.33	-0.296646	0.0393371	0.566
LINC00869	lincRNA	ENSG00000277147	1q21.2	-0.296409	0.0395172	4.169
LINC00578	lincRNA	ENSG00000228221	3q26.32	-0.29632	0.0395223	1.797
ABC12-49244600F4.4	lincRNA	ENSG00000276144	12p13.31	-0.295964	0.0397167	0.43
MAFTRR	lincRNA	ENSG00000261390	16q23.2	-0.295431	0.0401388	0.269
AC093063.3	lincRNA	ENSG00000269460	19q13.2	-0.294409	0.0143451	0.096
AC007383.3	lincRNA	ENSG00000227946	2q33.3	-0.294395	0.0411086	4.867
KB-1460A1.5	lincRNA	ENSG00000261087	8q22.3	-0.294306	0.0411086	1.744
RP1-290I10.7	lincRNA	ENSG00000229401	6p24.3	-0.294247	0.0345735	0.176
LINC00314	lincRNA	ENSG00000178457	21q21.3	-0.294024	0.022339	0.537
MEOX2-AS1	lincRNA	ENSG00000229108	7p21.2	-0.293684	0.0414052	0.445
SNHG8	lincRNA	ENSG00000269893	4q26	-0.293476	0.0417305	114.603
RP11-468E2.5	lincRNA	ENSG00000259321	14q12	-0.292292	0.0426597	0.705
RP11-70D24.2	lincRNA	ENSG00000278058	16q23.2	-0.292025	0.0428622	1.956
RP1-283E3.8	processed_transcript	ENSG00000268575	1p36.33	-0.29084	0.0439065	0.613
RP11-94M14.2	lincRNA	ENSG00000224750	10q23.31	-0.289804	0.0429029	0.14
BLACAT1	lincRNA	ENSG00000281406	1q32.1	-0.289804	0.0448028	0.354
RP4-809F18.1	lincRNA	ENSG00000255595	12q24.32	-0.28967	0.0429603	0.397
RP11-121M22.1	lincRNA	ENSG00000175773	11q24.3	-0.289508	0.0449444	0.208
RP11-90K6.1	lincRNA	ENSG00000239482	3q13.2	-0.289478	0.0449444	0.353
RP11-181C3.1	lincRNA	ENSG00000245017	12q23.1	-0.288886	0.0453882	0.454
RP11-214F16.8	lincRNA	ENSG00000280710	13q32.3	-0.288886	0.045344	0.208
RP11-571M6.17	lincRNA	ENSG00000270039	12q14.1	-0.288589	0.0456368	2.461
RP11-111J6.2	lincRNA	ENSG00000260331	2p24.2	-0.28776	0.0465119	0.358
RP11-396B14.2	lincRNA	ENSG00000263033	16p13.13	-0.287405	0.0467747	0.201
RP11-819C21.1	lincRNA	ENSG00000261098	11q22.3	-0.287375	0.0467747	0.629
RP11-803B1.8	lincRNA	ENSG00000272690	3p12.3	-0.286664	0.0472244	0.462
RP11-338N10.3	lincRNA	ENSG00000269978	1p36.23	-0.285628	0.0470325	0.669
RP11-197N18.2	processed_transcript	ENSG00000256028	12q24.31	-0.28542	0.0483448	0.506
RP11-79H23.3	lincRNA	ENSG00000261618	8q21.13	-0.284976	0.0486906	0.3
LBX1-AS1	processed_transcript	ENSG00000227128	10q24.32	-0.284413	0.0487128	3.024
CTD-2337I7.1	lincRNA	ENSG00000255345	11q14.1	-0.283999	0.0493849	0.269
AP000344.3	lincRNA	ENSG00000234928	22q11.23	-0.280578	0.0470983	0.099
RP11-142A22.4	lincRNA	ENSG00000272727	4q31.21	-0.28037	0.0484289	0.243
RP11-345F18.1	lincRNA	ENSG00000250821	4q12	-0.279911	0.0377789	0.609
RP4-809F18.2	lincRNA	ENSG00000257061	12q24.32	-0.276535	0.0476635	0.313
LINC01028	lincRNA	ENSG00000267603	17q24.3	-0.265576	0.0395514	0.153
RP11-531H8.2	lincRNA	ENSG00000254789	11p15.2	-0.258082	0.0483448	0.152
RP11-25L3.3	lincRNA	ENSG00000263655	18q22.3	0.274787	0.0415272	0.177
ERVK3-1	processed_transcript	ENSG00000142396	19q13.43	0.285953	0.047894	23.658
CTC-459F4.1	lincRNA	ENSG00000261770	19q11	0.286931	0.0470983	0.332
RP11-702B10.2	lincRNA	ENSG00000273415	11q24.3	0.287597	0.0423863	1.053
TRBV11-2	lincRNA	ENSG00000241657	7q34	0.289004	0.0450323	0.698
AP001046.5	lincRNA	ENSG00000237989	21q22.3	0.290278	0.0443564	0.27
MIAT	lincRNA	ENSG00000225783	22q12.1	0.290426	0.0442817	0.903
RP3-369A17.4	lincRNA	ENSG00000224164	6p22.3	0.292914	0.0420285	0.312
RP11-299L17.3	lincRNA	ENSG00000258675	14q31.1	0.292943	0.0302887	0.184
RP11-72M17.1	lincRNA	ENSG00000258561	14q23.3	0.292943	0.0418294	0.256
LINC00565	lincRNA	ENSG00000260910	13q34	0.294335	0.0411086	0.582
RP11-672A2.4	lincRNA	ENSG00000254810	11q13.5	0.297386	0.0388653	0.322
KB-1732A1.1	lincRNA	ENSG00000253669	8q22.3	0.297771	0.0388139	0.385
RP11-225B17.2	lincRNA	ENSG00000273014	7p14.3	0.300526	0.0366692	3.621
RP11-20J15.3	lincRNA	ENSG00000229116	10q11.21	0.301385	0.0359983	0.354
LINC01197	lincRNA	ENSG00000248441	15q26.2	0.301859	0.035719	0.524
RP11-214O1.2	lincRNA	ENSG00000266709	17p12	0.304998	0.0333007	0.407
RP13-297E16.4	lincRNA	ENSG00000223511	Xp22.33	0.306568	0.03198	0.41
RP11-367G6.3	lincRNA	ENSG00000272053	6p22.3	0.306805	0.03198	0.357
RP11-165A20.3	lincRNA	ENSG00000273107	10p12.1	0.307368	0.0265095	0.295
AC006129.2	lincRNA	ENSG00000268027	19q13.2	0.309145	0.0305458	1.847
LINC01013	lincRNA	ENSG00000228495	6q23.2	0.309589	0.0302887	0.145
RP11-613D13.8	lincRNA	ENSG00000244953	11p11.2	0.310803	0.0295825	0.101
RP11-191L17.1	lincRNA	ENSG00000272663	2p16.3	0.311248	0.0295825	0.369
LINC00460	lincRNA	ENSG00000233532	13q33.2	0.312314	0.0283743	0.461
CTD-2078B5.2	lincRNA	ENSG00000271334	5p13.1	0.313973	0.0280901	0.967
LINC01150	lincRNA	ENSG00000229671	11p15.5	0.316164	0.0266957	0.589
CTD-2066L21.3	lincRNA	ENSG00000250697	5p13.3	0.316461	0.00869312	0.115
RP11-567M16.1	processed_transcript	ENSG00000267287	18q23	0.318327	0.0257792	0.156
RP11-443B7.1	lincRNA	ENSG00000238005	1q42.3	0.320548	0.0245338	0.427
DUXAP8	processed_transcript	ENSG00000206195	22q11.1	0.323495	0.0231686	1.182
RP11-525A16.4	lincRNA	ENSG00000273143	10q25.2	0.323984	0.0203334	0.224
LINC00923	lincRNA	ENSG00000251209	15q26.2	0.324132	0.0184996	0.234
LINC00327	lincRNA	ENSG00000232977	13q12.12	0.324635	0.0224868	0.375
RP11-863P13.3	lincRNA	ENSG00000261327	16q24.2	0.324813	0.0224331	1.251
AP000432.1	processed_transcript	ENSG00000280594	21q21.1	0.32502	0.0224216	0.426
RP11-58E21.3	lincRNA	ENSG00000258929	14q21.3	0.326235	0.0218303	0.293
RP11-348P10.2	lincRNA	ENSG00000272077	3p21.31	0.326472	0.0217414	0.611
LINC00528	lincRNA	ENSG00000269220	22q11.21	0.32662	0.0217085	0.205
RP11-479J7.2	lincRNA	ENSG00000229588	1q24.1	0.328812	0.0169977	0.178
RP11-247C2.2	lincRNA	ENSG00000248540	15q24.1	0.330144	0.0200913	0.247
AC112715.2	lincRNA	ENSG00000224132	2q37.3	0.330574	0.0197247	0.635
RP11-395G23.3	lincRNA	ENSG00000254615	8q23.1	0.333077	0.0189231	1.038
AC006262.5	lincRNA	ENSG00000268621	19q13.32	0.334069	0.0172851	3.169
RP11-426C22.5	lincRNA	ENSG00000260517	16p11.2	0.334187	0.0185267	0.595
GS1-600G8.5	lincRNA	ENSG00000235385	Xp22.2	0.334365	0.0184924	20.724
RP11-95H3.1	lincRNA	ENSG00000259847	16q21	0.336749	0.0173233	0.437
TEX41	lincRNA	ENSG00000226674	2q22.3	0.337223	0.0172851	1.547
RP11-472N13.3	lincRNA	ENSG00000237797	10p11.22	0.337312	0.0172851	1.075
RP1-79C4.4	lincRNA	ENSG00000271811	1q24.2	0.339548	0.0163544	0.179
LINC00162	lincRNA	ENSG00000275874	21q22.3	0.339593	0.0161727	7.335
RP11-203J24.9	processed_transcript	ENSG00000257524	9q34.11	0.341429	0.0156543	5.433
RP5-1028K7.2	lincRNA	ENSG00000266088	17q21.2	0.341696	0.0155765	0.653
LINC01356	lincRNA	ENSG00000215866	1p13.2	0.342199	0.015388	0.328
RP11-180N14.1	lincRNA	ENSG00000272511	3p24.3	0.342895	0.0151959	0.269
RP11-873E20.1	lincRNA	ENSG00000267397	18q12.2	0.344776	0.0144956	0.336
AC022182.3	lincRNA	ENSG00000254802	8q12.2	0.34522	0.0143451	0.282
AC004540.5	lincRNA	ENSG00000214870	7p15.2	0.345961	0.0141576	0.991
AL163953.3	processed_transcript	ENSG00000237356	14q22.1	0.346138	0.0141247	0.315
AC104655.3	lincRNA	ENSG00000226508	2q12.1	0.346375	0.0140261	0.286
RP4-616B8.5	lincRNA	ENSG00000274825	20q11.23	0.346375	0.0140573	0.467
MIRLET7BHG	lincRNA	ENSG00000197182	22q13.31	0.346435	0.0140573	1.162
RP11-114M1.2	lincRNA	ENSG00000236385	3q26.32	0.347723	0.0102755	0.255
LINC01094	lincRNA	ENSG00000251442	4q21.21	0.348478	0.0134887	3.772
RP11-379B8.1	lincRNA	ENSG00000226453	6q14.1	0.349693	0.0130393	0.199
RASAL2-AS1	lincRNA	ENSG00000224687	1q25.2	0.351559	0.0126297	0.484
CTD-2006C1.2	processed_transcript	ENSG00000219665	19p13.2	0.354402	0.0116699	3.33
RP5-875H18.9	lincRNA	ENSG00000276851	17q21.33	0.35532	0.011494	2.435
RP3-473L9.4	lincRNA	ENSG00000257595	12q24.12	0.358134	0.0103062	0.255
CBR3-AS1	processed_transcript	ENSG00000236830	21q22.12	0.359171	0.0103841	1.015
PCED1B-AS1	processed_transcript	ENSG00000247774	12q13.11	0.361126	0.00996428	19.943
RP11-94A24.1	lincRNA	ENSG00000255364	8q24.13	0.363154	0.00693535	0.149
LINC01605	lincRNA	ENSG00000253161	8p11.23	0.366723	0.00871078	0.96
CTD-2081C10.7	lincRNA	ENSG00000272416	5q11.2	0.367257	0.00863132	0.338
RP11-154H12.2	lincRNA	ENSG00000266924	18q23	0.36819	0.00739005	0.189
RP11-681H18.2	lincRNA	ENSG00000277801	14q31.3	0.368886	0.00827539	5.413
MIR155HG	lincRNA	ENSG00000234883	21q21.3	0.3709	0.00789424	1.776
RP11-54A9.1	lincRNA	ENSG00000257219	12q21.2	0.373121	0.00739005	0.41
MIR4435-2HG	lincRNA	ENSG00000172965	2q13	0.374454	0.00718005	68.43
LINC00511	lincRNA	ENSG00000227036	17q24.3	0.37555	0.00694791	0.661
CTD-3252C9.4	lincRNA	ENSG00000267519	19p13.12	0.376764	0.00680718	10.233
LINC01410	lincRNA	ENSG00000238113	9q13	0.376942	0.0067946	0.429
LEF1-AS1	processed_transcript	ENSG00000232021	4q25	0.377919	0.00660034	0.442
RP13-1016M1.2	lincRNA	ENSG00000272783	4p16.3	0.377979	0.00614889	0.435
RP11-1008C21.1	lincRNA	ENSG00000259225	15q14	0.379696	0.00628896	0.794
AC000403.4	lincRNA	ENSG00000278727	13q22.3	0.380615	0.00614889	0.278
MIR503HG	lincRNA	ENSG00000223749	Xq26.3	0.381829	0.00597442	3.67
RP11-706O15.1	lincRNA	ENSG00000205664	Xp22.33	0.381918	0.00597442	5.982
RP11-426C22.8	lincRNA	ENSG00000277999	16p11.2	0.384969	0.00549682	0.211
RP11-131L23.2	lincRNA	ENSG00000273264	1p22.3	0.384983	0.0051538	0.301
CTC-436P18.3	lincRNA	ENSG00000249279	5q12.1	0.386686	0.00260866	0.12
RP11-473E2.4	lincRNA	ENSG00000228877	9q34.3	0.386805	0.00307623	0.141
RP11-177H13.2	processed_transcript	ENSG00000253837	8p21.3	0.389619	0.00494007	0.309
RP3-522D1.1	lincRNA	ENSG00000224167	1p13.2	0.395128	0.00415832	1.383
RP11-488C13.5	lincRNA	ENSG00000258301	14q24.3	0.395394	0.0041559	7.659
RP11-400N13.3	lincRNA	ENSG00000232679	1q41	0.396253	0.00354375	0.299
RNF144A-AS1	processed_transcript	ENSG00000228203	2p25.1	0.396816	0.00407038	0.381
RP11-535M15.1	lincRNA	ENSG00000224848	9q22.33	0.399037	0.00376822	0.642
RP11-346C20.4	lincRNA	ENSG00000272250	16q22.3	0.399541	0.00376822	0.367
AC017002.1	lincRNA	ENSG00000240350	2q13	0.399807	0.00376497	0.261
AP001434.2	lincRNA	ENSG00000226012	21q22.13	0.400652	0.00303941	0.265
LINC01588	lincRNA	ENSG00000214900	14q21.3	0.406324	0.00314131	0.208
RP11-42I10.1	lincRNA	ENSG00000260086	16q12.1	0.409715	0.00287951	0.258
CTC-378H22.1	processed_transcript	ENSG00000254887	19q13.2	0.410885	0.0028019	0.228
RP11-1C8.6	lincRNA	ENSG00000266289	8q22.3	0.412958	0.00262092	0.349
LINC00152	lincRNA	ENSG00000222041	2p11.2	0.41361	0.00260274	90.965
RP11-888D10.3	lincRNA	ENSG00000264964	18p11.22	0.418408	0.00229495	0.302
RP11-108L7.15	lincRNA	ENSG00000273162	10q24.31	0.420155	0.00222322	0.217
RP11-536O18.1	lincRNA	ENSG00000226197	9p23	0.422762	0.00206046	1.281
RP11-760H22.2	lincRNA	ENSG00000254343	8q24.12	0.424272	0.00198442	2.993
SHANK3	processed_transcript	ENSG00000251322	22q13.33	0.427116	0.00180473	2.579
RP11-47I22.2	lincRNA	ENSG00000250548	14q23.1	0.429219	0.00170961	0.468
GAS6-AS2	lincRNA	ENSG00000272695	13q34	0.432892	0.00154599	1.567
RP11-626H12.2	lincRNA	ENSG00000254605	11q13.3	0.437423	0.00121023	0.363
RP11-405M12.4	lincRNA	ENSG00000273669	18q22.3	0.43846	0.00125108	0.407
RP11-479G22.8	lincRNA	ENSG00000273038	10p11.22	0.438549	0.00125108	2.113
AC000067.1	lincRNA	ENSG00000225007	22q11.21	0.44739	0.000238983	0.181
RP3-431P23.5	lincRNA	ENSG00000269155	6q27	0.451522	0.000796817	0.331
LINC00961	lincRNA	ENSG00000235387	9p13.3	0.456616	0.000662005	0.899
LINC01048	lincRNA	ENSG00000230390	13q13.3	0.45789	0.000481666	0.306
RP11-147L13.15	lincRNA	ENSG00000274712	17q24.2	0.459608	0.000591256	0.838
RP11-488C13.7	lincRNA	ENSG00000258610	14q24.3	0.460437	0.000580454	4.419
CTD-2334D19.1	lincRNA	ENSG00000248927	5q23.1	0.463103	0.000497901	0.168
AC156455.1	processed_transcript	ENSG00000256546	12q24.31	0.467249	0.000457834	1.894
RP11-394O4.5	lincRNA	ENSG00000269936	5q32	0.468582	0.000435377	1.091
RP11-426C22.4	lincRNA	ENSG00000259807	16p11.2	0.469086	0.000433265	0.272
RP13-463N16.6	lincRNA	ENSG00000242147	10p15.1	0.470181	0.00039619	0.204
RP11-473M20.9	lincRNA	ENSG00000262370	16p13.3	0.472225	0.00039619	0.753
LINC01235	lincRNA	ENSG00000270547	9p23	0.473351	0.000388579	2.309
MIR143HG	lincRNA	ENSG00000249669	5q32	0.476994	0.000347401	0.3
CTD-2171N6.1	lincRNA	ENSG00000267013	18q21.2	0.482917	0.000279374	0.347
RP11-865I6.2	lincRNA	ENSG00000254337	8q13.2	0.483939	0.000165807	5.656
RP11-462L8.1	lincRNA	ENSG00000229656	10p11.22	0.484043	0.000267706	0.195
RP11-175K6.1	lincRNA	ENSG00000245812	5q33.3	0.488989	0.000228687	0.718
EML2-AS1	processed_transcript	ENSG00000267757	19q13.32	0.489789	0.000226072	1.124
CTB-193M12.5	lincRNA	ENSG00000280206	16p13.11	0.495624	0.000174957	6.307
HAGLROS	lincRNA	ENSG00000226363	2q31.1	0.500422	0.000148415	0.344
RP3-495K2.2	lincRNA	ENSG00000229720	6q27	0.504865	0.000127206	0.245
RP11-557H15.4	lincRNA	ENSG00000232310	6q23.2	0.504894	0.000127206	0.222
FLJ22447	lincRNA	ENSG00000232774	14q23.1	0.508182	0.000118083	0.447
LINC00987	lincRNA	ENSG00000237248	12p13.31	0.508241	0.000118083	0.41
RP11-65J21.3	lincRNA	ENSG00000262454	16p13.12	0.508626	0.000118083	2.101
AC006126.4	lincRNA	ENSG00000267045	19q13.32	0.521022	6.7738e-05	0.726
C22orf34	lincRNA	ENSG00000188511	22q13.33	0.530011	4.43514e-05	0.54
RP5-907D15.4	lincRNA	ENSG00000268941	20q13.32	0.534839	3.6288e-05	0.557
SH3RF3-AS1	lincRNA	ENSG00000259863	2q13	0.535165	3.6288e-05	0.344
LINC00632	lincRNA	ENSG00000203930	Xq27.1	0.535787	3.6288e-05	0.92
RP11-768F21.1	lincRNA	ENSG00000248636	12q24.23	0.537623	3.5156e-05	0.454
PCAT19	lincRNA	ENSG00000267107	19q13.2	0.544258	3.0249e-05	1.233
RP5-1011O1.3	lincRNA	ENSG00000236069	1q31.2	0.546835	2.83218e-06	0.099
RP11-417E7.2	lincRNA	ENSG00000261039	6q27	0.54916	2.41523e-05	0.701
RP11-598F7.6	lincRNA	ENSG00000256540	12p13.33	0.563895	1.22069e-05	0.448
LINC00626	lincRNA	ENSG00000225826	1q24.2	0.573728	4.80714e-07	0.203
GDNF-AS1	lincRNA	ENSG00000248587	5p13.2	0.575505	6.43839e-06	0.237
RP11-417E7.1	lincRNA	ENSG00000223485	6q27	0.582021	4.67177e-06	27.986
RP11-867G23.10	processed_transcript	ENSG00000254510	11q13.2	0.583117	4.42663e-06	0.266
GAPLINC	lincRNA	ENSG00000266835	18p11.31	0.591203	2.83218e-06	1.665
LINC00941	lincRNA	ENSG00000235884	12p11.21	0.618156	5.12227e-07	1.115
RP11-322E11.5	lincRNA	ENSG00000267583	18q12.2	0.619667	4.90964e-07	0.764
AC007879.7	lincRNA	ENSG00000229647	2q33.3	0.621651	4.80714e-07	0.984
LINC00702	lincRNA	ENSG00000233117	10p15.1	0.622569	4.80714e-07	0.978
AC112721.2	lincRNA	ENSG00000222032	2q37.3	0.625531	2.75172e-07	0.57
RP4-621F18.2	lincRNA	ENSG00000282057	1p22.3	0.641229	1.45638e-07	0.711
RP11-308N19.1	lincRNA	ENSG00000234323	9q31.2	0.646827	7.32305e-08	0.134
AC133644.2	lincRNA	ENSG00000280721	2p11.2	0.650855	8.56143e-08	1.744
AC112721.1	lincRNA	ENSG00000222022	2q37.3	0.655935	4.86602e-08	0.403
AC093850.2	lincRNA	ENSG00000230838	2q35	0.675083	3.67304e-08	2.919
APCDD1L-AS1	processed_transcript	ENSG00000231290	20q13.32	0.686161	2.63084e-08	0.877

## Sheet: S5A.2 miRNA
miR	cytoband(s)	Spearman rho	pvalue	FDR	mean.RPM
miR-200a-3p	1p36.33	-0.709856	1.43101e-12	4.79389e-10	35.361
miR-514a-3p	Xq27.3	-0.661666	1.38007e-10	1.54442e-08	58.351
miR-30d-5p	8q24.22	-0.658941	1.74319e-10	1.54442e-08	7465.26
miR-508-5p	Xq27.3	-0.654291	1.84409e-10	1.54442e-08	5.543
miR-508-3p	Xq27.3	-0.651951	3.13967e-10	1.99156e-08	206.835
miR-509-3p	Xq27.3	-0.650411	3.56698e-10	1.99156e-08	70.97
miR-200a-5p	1p36.33	-0.633143	1.42113e-09	6.61263e-08	42.211
miR-200b-3p	1p36.33	-0.631781	1.57914e-09	6.61263e-08	66.752
miR-30b-5p	8q24.22	-0.626716	2.32638e-09	8.6593e-08	370.525
miR-29b-2-5p	1q32.2	-0.619341	4.03958e-09	1.35326e-07	33.176
miR-429	1p36.33	-0.612869	6.47778e-09	1.80838e-07	9.844
miR-506-3p	Xq27.3	-0.6105	4.94027e-09	1.50454e-07	3.21
miR-193a-3p	17q11.2	-0.579089	6.47954e-08	1.66973e-06	23.57
miR-148b-3p	12q13.13	-0.561496	1.94536e-07	4.65498e-06	127.303
miR-1266-5p	15q21.2	-0.560104	2.11645e-07	4.72674e-06	4.123
miR-148a-5p	7p15.2	-0.558386	2.34721e-07	4.91448e-06	31.151
miR-95-3p	4p16.1	-0.551307	3.57366e-07	7.04221e-06	11.723
miR-29c-5p	1q32.2	-0.545679	4.95759e-07	9.22663e-06	21.016
miR-101-3p	1p31.3,9p24.1	-0.524709	1.59521e-06	2.8126e-05	8191.19
miR-130a-3p	11q12.1	-0.51381	2.84103e-06	4.75872e-05	239.365
miR-29c-3p	1q32.2	-0.501696	5.27325e-06	8.41209e-05	1288.24
miR-30e-5p	1p34.2	-0.489345	9.67327e-06	0.000140893	7971.61
miR-193a-5p	17q11.2	-0.48819	1.02258e-05	0.000142735	879.434
miR-148a-3p	7p15.2	-0.478415	1.6232e-05	0.000217509	37777.1
miR-1180-3p	17p11.2	-0.465976	2.86462e-05	0.000369095	33.028
miR-125a-5p	19q13.41	-0.453506	4.95373e-05	0.000614629	1036.23
miR-30c-5p	1p34.2,6q13	-0.447405	6.4269e-05	0.000742417	1010.96
miR-29a-3p	7q32.3	-0.432506	0.000118915	0.00124489	6663.45
miR-29b-3p	1q32.2,7q32.3	-0.4299	0.000132047	0.00134048	1114.34
miR-1287-5p	10q24.2	-0.417519	0.000214711	0.00205509	29.026
miR-194-5p	1q41,11q13.1	-0.413254	0.000252767	0.00222834	206.657
miR-101-5p	1p31.3	-0.412218	0.000262907	0.0022583	5.518
miR-99a-5p	21q21.1	-0.395365	0.000489659	0.00390561	914.733
miR-378c	10q26.3	-0.377919	0.000901252	0.0068618	16.275
miR-186-5p	1p31.1	-0.361896	0.00153349	0.0104841	278.73
miR-100-5p	11q24.1	-0.354402	0.00194833	0.0120868	15428.8
miR-30e-3p	1p34.2	-0.353099	0.00202998	0.012189	4261.24
miR-125b-5p	11q24.1,21q21.1	-0.351529	0.00213242	0.0125326	1445.24
miR-125b-2-3p	21q21.1	-0.347945	0.00238386	0.0134805	26.574
miR-29a-5p	7q32.3	-0.342584	0.00280971	0.0149405	10.146
miR-181c-5p	19p13.13	-0.340096	0.0030295	0.0158576	54.752
miR-664a-3p	1q41	-0.336838	0.00334049	0.0172164	41.804
miR-135b-5p	1q32.1	-0.328486	0.00427151	0.0213576	18.443
miR-32-5p	9q31.3	-0.323984	0.00486338	0.0232748	21.253
miR-365a-3p	16p13.12	-0.320933	0.00530467	0.0243434	81.314
miR-203a	14q32.33	-0.303695	0.00852727	0.0362001	396.447
miR-328-3p	16q22.1	-0.303162	0.00864968	0.0362001	33.499
miR-3615	17q25.1	-0.302718	0.00875285	0.0362001	7.198
miR-24-1-5p	9q22.32	-0.299578	0.00951312	0.0388646	16.555
miR-891a-5p	Xq27.3	-0.296024	0.0103927	0.0419465	5.791
miR-361-3p	Xq21.2	-0.292144	0.0115471	0.0449801	189.392
miR-497-5p	17p13.1	-0.291462	0.0117511	0.0450074	35.841
miR-26a-5p	3p22.2,12q14.1	-0.291225	0.0118228	0.0450074	2005.21
let-7c-5p	21q21.1	-0.289537	0.0123447	0.0459497	3385.1
miR-411-5p	14q32.31	0.28773	0.0129252	0.0475819	11.093
miR-212-3p	17p13.3	0.289981	0.0122055	0.0459419	5.379
miR-654-3p	14q32.31	0.292203	0.0115295	0.0449801	60.577
miR-126-5p	9q34.3	0.294691	0.0108113	0.0431165	142.821
miR-496	14q32.31	0.302866	0.00871834	0.0362001	4.266
miR-27a-5p	19p13.13	0.306716	0.00786189	0.0342043	14.856
miR-199a-5p	1q24.3,19p13.2	0.308197	0.00755268	0.0332914	1365.96
miR-134-5p	14q32.31	0.313143	0.00659589	0.0294617	381.543
miR-21-5p	17q23.1	0.315868	0.00611578	0.0276863	406513
miR-4326	20q13.33	0.321185	0.00520854	0.0242342	5.867
miR-625-3p	14q23.3	0.323451	0.00493807	0.0232994	97.709
miR-126-3p	9q34.3	0.326353	0.00454339	0.0220585	2148.55
miR-766-3p	Xq24	0.326472	0.0045279	0.0220585	7.033
miR-143-3p	5q32	0.331418	0.00392128	0.0199035	26249.5
miR-130b-3p	22q11.21	0.346405	0.00249985	0.0135073	9.799
miR-217	2p16.1	0.346997	0.00245466	0.0134805	56.409
miR-337-3p	14q32.2	0.347294	0.00243233	0.0134805	57.984
miR-1296-5p	10q21.3	0.350107	0.00222899	0.0128743	3.359
miR-493-5p	14q32.2	0.35298	0.00203756	0.012189	27.58
miR-758-3p	14q32.31	0.355291	0.00189436	0.0119738	20.926
miR-21-3p	17q23.1	0.355379	0.00188903	0.0119738	1947.18
miR-511-5p	10p12.33	0.357097	0.00178874	0.0117496	7.845
miR-152-3p	17q21.32	0.360385	0.00161006	0.0107874	276.132
miR-411-3p	14q32.31	0.363688	0.00144566	0.0100895	2.713
miR-130b-5p	22q11.21	0.364087	0.00142822	0.0100895	11.567
miR-181a-2-3p	9q33.3	0.365953	0.00134379	0.00978626	656.305
miR-503-5p	Xq26.3	0.374335	0.00101741	0.00757406	22.233
miR-214-5p	1q24.3	0.393084	0.000531327	0.00413941	36.382
miR-137	1p21.3	0.398623	0.000434362	0.00354906	4.875
miR-23a-3p	19p13.13	0.399185	0.000426484	0.00354906	3594.74
miR-199a-3p	1q24.3,19p13.2	0.414054	0.000245191	0.00221997	2443.81
miR-199b-3p	9q34.11	0.415624	0.000230922	0.00214886	2433.69
miR-143-5p	5q32	0.427116	0.000147543	0.00145373	29.171
miR-181a-1-3p	1q32.1	0.436268	0.000102077	0.00110309	207.579
miR-27a-3p	19p13.13	0.437038	9.89137e-05	0.00110309	1201.97
miR-24-2-5p	19p13.13	0.452203	5.23918e-05	0.000626831	27.275
miR-214-3p	1q24.3	0.493906	7.7527e-06	0.000118052	6.121

## Sheet: S5B README
07 April 2017
Gordon Robertson, BC Cancer Agency, Vancouver BC Canada
Table S4B: Results from SAM 2-class unpaired differential abundance calculations, for the subtype with good prognosis in TCGA and Bueno cohorts.
Worksheets
S4B.1	lncRNA TCGA S1 vs other UP	TCGA lncRNAs that were differentially MORE abundant between the better-survival lncRNA subtype 1 and all other samples
S4B.2	lncRNA TCGA S1 vs other DN	TCGA lncRNAs that were differentially LESS abundant between the better-survival lncRNA subtype 1 and all other samples
S4B.3	miR TCGA S1 vs other UP	TCGA miRNA mature strands that were differentially MORE abundant between the better-survival miR subtype 1 and all other samples
S4B.4	miR TCGA S1 vs other DN	TCGA miRNA mature strands that were differentially LESS abundant between the better-survival miR subtype 1 and all other samples
S4B.5	lncRNA Bueno good vs other UP	Bueno lncRNAs that were differentially MORE abundant between the better-survival lncRNA subtype and all other samples
S4B.6	lncRNA Bueno good vs other DN	Bueno lncRNAs that were differentially LESS abundant between the better-survival lncRNA subtype and all other samples
UP worksheets are sorted by descending FC, while DN worksheets are sorted by ascending -1/FC
Columns in a worksheet
score.order	Order returned by SAM
lncRNA or mRNA mature strand	Ensembl v82 lncRNA, or miRNA mature strand (v16 miRBase with v20 names)
cytoband	Location(s) from which the mature strand can be expressed
score	SAM score
q.value	FDR reported by SAM. Note that this is in percent, so a reported 5.0% = 0.05.
mean.tgt	Mean RPM (FPKM) for samples in the target subtype
mean.other	Mean RPM (FPKM) for the 'other' samples
FC	Means-based fold change, target/other
-1/FC	Negative inverse of above FC
wilcoxon.p	Wilcoxon p-value
wilcoxon.p.adj.bh	Benjamini-Hochberg-corrected Wilcoxon p-value

## Sheet: S5B.1 lncRNA TCGA S1 vs othr UP
score order	lncRNA	biotype	ENSG	cytoband	score	q.value (pct)	mean.tgt	mean.other	FC	-1/FC	wilcoxon.p	wilcoxon.p.adj.bh
1	RP11-263K4.5	lincRNA	ENSG00000258170	12q21.31	2.863	0	49.976	0.846	59.101	-0.017	5.86e-09	2.35e-06
145	RP11-863P13.6	lincRNA	ENSG00000260166	16q24.2	1.175	0.192	2.777	0.285	9.739	-0.103	0.0101	0.0243
4	LINC01550	lincRNA	ENSG00000246223	14q32.2	2.544	0	11.956	1.744	6.853	-0.146	3.74e-07	2.13e-05
12	RP11-114M1.1	lincRNA	ENSG00000228561	3q26.32	2.355	0	1.174	0.18	6.525	-0.153	2.39e-06	5.32e-05
9	LINC00689	processed_transcript	ENSG00000231419	7q36.3	2.434	0	3.42	0.545	6.278	-0.159	1.16e-06	3.1e-05
5	RP11-88H9.2	lincRNA	ENSG00000231437	1p13.2	2.532	0	1.664	0.306	5.438	-0.184	4.25e-07	2.13e-05
143	RP11-879F14.2	lincRNA	ENSG00000267279	18q21.33	1.181	0.192	5.487	1.121	4.896	-0.204	0.0185	0.0367
7	RP11-297J22.1	lincRNA	ENSG00000271709	2q14.2	2.477	0	14.362	2.963	4.848	-0.206	7.51e-07	2.62e-05
15	TINCR	lincRNA	ENSG00000223573	19p13.3	2.27	0	3.876	0.817	4.746	-0.211	5.79e-06	0.000106
118	LINC00314	lincRNA	ENSG00000178457	21q21.3	1.284	0.128	1.24	0.277	4.482	-0.223	0.00459	0.0137
2	RP11-689K5.3	lincRNA	ENSG00000251331	4q21.22	2.69	0	1.365	0.305	4.472	-0.224	6.21e-08	8.3e-06
37	LINC00113	lincRNA	ENSG00000225298	21q21.3	1.935	0	2.912	0.655	4.443	-0.225	9.26e-05	0.000807
38	RP11-141M3.6	processed_transcript	ENSG00000273328	3p22.1	1.935	0	1.567	0.383	4.094	-0.244	0.000111	0.000873
11	LINC00473	lincRNA	ENSG00000223414	6q27	2.367	0	4.425	1.124	3.937	-0.254	2.26e-06	5.32e-05
6	CTC-573N18.1	lincRNA	ENSG00000250509	5q35.3	2.501	0	6.593	1.77	3.725	-0.268	5.84e-07	2.6e-05
168	RP11-345F18.1	lincRNA	ENSG00000250821	4q12	1.035	0.434	1.297	0.354	3.663	-0.273	0.0274	0.0504
10	AJ011932.1	lincRNA	ENSG00000274248	21q22.3	2.422	0	4.53	1.271	3.563	-0.281	1.31e-06	3.28e-05
47	AC017104.6	processed_transcript	ENSG00000224376	2q37.1	1.814	0	16.127	4.886	3.301	-0.303	0.000293	0.00181
17	RP11-554I8.2	lincRNA	ENSG00000223784	10p14	2.167	0	3.944	1.21	3.261	-0.307	1.51e-05	0.000224
34	LINC00578	lincRNA	ENSG00000228221	3q26.32	1.947	0	3.634	1.117	3.253	-0.307	0.000101	0.000827
44	LINC00940	lincRNA	ENSG00000235049	12p13.33	1.856	0	1.16	0.361	3.211	-0.311	0.00021	0.00138
3	LINC01186	lincRNA	ENSG00000236751	Xp11.3	2.605	0	1.514	0.483	3.132	-0.319	1.96e-07	1.31e-05
61	RP1-137D17.2	lincRNA	ENSG00000272848	6q27	1.625	0	3.733	1.224	3.049	-0.328	0.00118	0.00532
97	AC067959.1	lincRNA	ENSG00000233005	2p24.1	1.403	0.128	8.026	2.642	3.038	-0.329	0.00512	0.015
27	RP11-102N12.3	lincRNA	ENSG00000273472	4q31.21	2.014	0	1.72	0.574	2.997	-0.334	5.75e-05	0.000576
119	LINC00707	lincRNA	ENSG00000238266	10p14	1.284	0.128	1.939	0.651	2.977	-0.336	0.0104	0.0247
29	RP11-638I2.6	lincRNA	ENSG00000258504	14q32.2	1.984	0	16.608	6.152	2.7	-0.37	7.44e-05	0.00071
99	C8orf37-AS1	lincRNA	ENSG00000253773	8q22.1	1.388	0.128	10.388	3.855	2.694	-0.371	0.00562	0.0162
91	CTD-2532K18.2	lincRNA	ENSG00000251144	5q35.2	1.442	0	1.304	0.492	2.651	-0.377	0.00333	0.011
35	RP11-19E11.1	lincRNA	ENSG00000258910	2q14.2	1.947	0	6.714	2.613	2.569	-0.389	0.000101	0.000827
14	RP11-434E6.4	lincRNA	ENSG00000277559	16q12.2	2.276	0	2.325	0.912	2.549	-0.392	5.46e-06	0.000104
161	LINC00885	lincRNA	ENSG00000224652	3q29	1.077	0.434	2.26	0.919	2.459	-0.407	0.0317	0.0553
22	EPB41L4A-AS2	lincRNA	ENSG00000278921	5q22.2	2.112	0	2.29	0.938	2.441	-0.41	2.47e-05	0.0003
181	RP5-887A10.1	lincRNA	ENSG00000234184	1p31.1	0.931	0.626	2.472	1.014	2.439	-0.41	0.0627	0.0938
78	RP11-276H19.1	lincRNA	ENSG00000226237	9q21.33	1.515	0	1.077	0.444	2.428	-0.412	0.00249	0.00892
59	LINC00545	lincRNA	ENSG00000236094	13q12.3	1.631	0	3.505	1.484	2.361	-0.424	0.00113	0.00532
156	LINC00176	lincRNA	ENSG00000196421	20q13.33	1.114	0.192	1.267	0.551	2.299	-0.435	0.0263	0.0486
8	RP1-292L20.3	lincRNA	ENSG00000274818	14q24.2	2.471	0	2.215	0.993	2.231	-0.448	7.99e-07	2.62e-05
40	RP11-473M20.16	lincRNA	ENSG00000261889	16p13.3	1.874	0	1.08	0.487	2.216	-0.451	0.000182	0.00133
117	RP11-273G15.2	lincRNA	ENSG00000247317	8q24.3	1.29	0.128	3.684	1.686	2.184	-0.458	0.01	0.0242
42	CDC37L1-AS1	lincRNA	ENSG00000273061	9p24.1	1.862	0	5.634	2.583	2.182	-0.458	0.0002	0.00138
25	AC124789.1	processed_transcript	ENSG00000276170	17q12	2.051	0	46.785	21.821	2.144	-0.466	4.21e-05	0.000444
178	SERPINB9P1	lincRNA	ENSG00000230438	6p25.2	0.968	0.626	5.664	2.643	2.143	-0.467	0.0537	0.0822
79	RP11-384O8.1	lincRNA	ENSG00000267034	2q36.1	1.509	0	2.836	1.326	2.139	-0.468	0.00259	0.00919
115	DIO3OS	lincRNA	ENSG00000258498	14q32.31	1.308	0.128	4.847	2.308	2.1	-0.476	0.00903	0.0222
16	RP11-359M6.1	lincRNA	ENSG00000257474	12q21.2	2.246	0	19.482	9.36	2.081	-0.48	7.28e-06	0.000127
128	CTD-2600O9.1	lincRNA	ENSG00000187185	16q21	1.248	0.128	3.854	1.866	2.065	-0.484	0.0128	0.0282
43	LINC01133	lincRNA	ENSG00000224259	1q23.2	1.856	0	53.1	25.803	2.058	-0.486	0.00021	0.00138
93	RP11-44N21.1	lincRNA	ENSG00000257556	14q32.33	1.436	0	4.923	2.393	2.057	-0.486	0.00415	0.0129
23	RP1-257A7.5	lincRNA	ENSG00000272379	6p24.1	2.087	0	15.665	7.631	2.053	-0.487	3.06e-05	0.00035
121	RP11-79N23.1	lincRNA	ENSG00000227885	6p12.1	1.278	0.128	1.107	0.545	2.03	-0.493	0.0108	0.0247
63	LINC00475	lincRNA	ENSG00000225511	9q22.31	1.619	0	2.515	1.242	2.026	-0.494	0.00123	0.00548
26	RP11-499E18.1	lincRNA	ENSG00000248161	4q24	2.039	0	7.859	3.94	1.995	-0.501	4.67e-05	0.00048
74	RP11-71E19.1	lincRNA	ENSG00000250934	3q21.3	1.537	0	1.498	0.751	1.995	-0.501	0.00215	0.00798
46	RP11-626G11.6	lincRNA	ENSG00000278389	16p12.3	1.814	0	2.652	1.332	1.991	-0.502	0.000293	0.00181
18	RP11-347C12.10	lincRNA	ENSG00000260219	16p11.2	2.148	0	4.434	2.258	1.964	-0.509	1.78e-05	0.000238
98	AC005606.15	lincRNA	ENSG00000260107	16p13.3	1.4	0.128	7.363	3.756	1.961	-0.51	0.00522	0.0152
85	RP11-1072A3.4	lincRNA	ENSG00000275263	16p11.2	1.473	0	1.342	0.686	1.956	-0.511	0.00329	0.011
13	RP1-78O14.1	lincRNA	ENSG00000257894	12q21.2	2.276	0	17.598	9.05	1.945	-0.514	5.46e-06	0.000104
49	LINC00886	lincRNA	ENSG00000240875	3q25.31	1.795	0	1.291	0.67	1.927	-0.519	0.000338	0.00202
36	RP1-178F15.5	processed_transcript	ENSG00000271853	1q21.3	1.941	0	4.388	2.295	1.912	-0.523	0.000106	0.00085
182	RP11-670E13.6	lincRNA	ENSG00000274213	17q22	0.925	0.798	4.13	2.182	1.892	-0.528	0.0652	0.0972
92	TMEM191A	processed_transcript	ENSG00000226287	22q11.21	1.442	0	6.312	3.362	1.878	-0.533	0.00399	0.0125
20	PSMB8-AS1	lincRNA	ENSG00000204261	6p21.32	2.136	0	43.938	23.416	1.876	-0.533	1.99e-05	0.000257
51	AC010894.3	lincRNA	ENSG00000226853	2q31.1	1.747	0	3.715	1.989	1.868	-0.535	0.000488	0.00276
52	MIR4458HG	lincRNA	ENSG00000247516	5p15.31	1.722	0	8.977	4.816	1.864	-0.536	0.000585	0.00321
88	RP4-625H18.2	lincRNA	ENSG00000228412	6p22.3	1.455	0	2.904	1.564	1.856	-0.539	0.0037	0.0118
131	RP11-517P14.2	lincRNA	ENSG00000230555	10q11.21	1.229	0.192	2.163	1.17	1.849	-0.541	0.0142	0.03
21	RP11-1017G21.5	lincRNA	ENSG00000271780	14q32.31	2.118	0	1.772	0.965	1.837	-0.544	2.34e-05	0.000293
114	KB-1572G7.2	processed_transcript	ENSG00000273000	22q11.23	1.321	0.128	1.222	0.667	1.833	-0.546	0.00841	0.0209
30	CH17-360D5.2	lincRNA	ENSG00000276850	10q11.22	1.978	0	31.448	17.164	1.832	-0.546	7.83e-05	0.00073
109	RP13-977J11.2	lincRNA	ENSG00000256576	12q24.33	1.339	0.128	2.121	1.161	1.826	-0.548	0.00755	0.0194
193	RP11-79P5.9	lincRNA	ENSG00000272525	5q13.2	0.87	0.798	1.323	0.726	1.821	-0.549	0.0828	0.116
89	LINC01341	processed_transcript	ENSG00000227953	1q44	1.455	0	2.374	1.305	1.82	-0.55	0.0037	0.0118
125	RP11-736N17.10	lincRNA	ENSG00000278071	14q32.32	1.266	0.128	3.601	1.979	1.82	-0.549	0.0115	0.0261
41	LINC00467	lincRNA	ENSG00000153363	1q32.3	1.868	0	5.012	2.759	1.816	-0.551	0.000191	0.00134
67	FLJ20021	lincRNA	ENSG00000254531	4q24	1.588	0	14.701	8.114	1.812	-0.552	0.00152	0.00635
19	SRP54-AS1	processed_transcript	ENSG00000258704	14q13.2	2.148	0	1.516	0.837	1.811	-0.552	1.78e-05	0.000238
28	AC034220.3	processed_transcript	ENSG00000233006	5q31.1	1.99	0	6.641	3.667	1.811	-0.552	7.07e-05	0.000691
54	RP11-91G21.1	lincRNA	ENSG00000268129	3q23	1.692	0	2.479	1.375	1.804	-0.554	0.000731	0.00381
45	RP11-490M8.1	lincRNA	ENSG00000260025	2p22.2	1.814	0	27.105	15.188	1.785	-0.56	0.000293	0.00181
103	RP11-66N24.4	processed_transcript	ENSG00000157306	14q11.2	1.375	0.128	2.208	1.241	1.778	-0.562	0.00606	0.017
159	RP11-398C13.6	lincRNA	ENSG00000272853	10p13	1.083	0.434	1.372	0.773	1.775	-0.563	0.0307	0.0542
84	LINC00993	lincRNA	ENSG00000235687	10p11.21	1.479	0	1.07	0.604	1.772	-0.564	0.0018	0.00722
32	RPARP-AS1	processed_transcript	ENSG00000269609	10q24.32	1.966	0	9.429	5.33	1.769	-0.565	8.66e-05	0.000772
94	LINC01176	lincRNA	ENSG00000281404	7p14.3	1.43	0	2.527	1.429	1.769	-0.565	0.00431	0.0131
127	RP11-379F4.7	lincRNA	ENSG00000272087	3q25.32	1.254	0.128	20.292	11.469	1.769	-0.565	0.0124	0.0278
56	AC007405.6	lincRNA	ENSG00000239467	2q31.1	1.668	0	3.065	1.734	1.768	-0.566	0.000872	0.00432
152	RP11-420N3.3	processed_transcript	ENSG00000279877	16p13.3	1.138	0.192	1.444	0.82	1.761	-0.568	0.0232	0.0441
58	RP11-357D18.1	processed_transcript	ENSG00000250978	5q13.1	1.637	0	1.832	1.052	1.741	-0.574	0.00106	0.00512
65	LINC01569	lincRNA	ENSG00000262468	16p13.3	1.594	0	2.626	1.51	1.74	-0.575	0.00146	0.00616
194	AC009299.3	lincRNA	ENSG00000227403	2q24.2	0.864	0.798	1.591	0.915	1.74	-0.575	0.0849	0.118
108	GUSBP11	processed_transcript	ENSG00000228315	22q11.23	1.345	0.128	5.02	2.891	1.737	-0.576	0.00728	0.0191
57	RP11-303E16.8	processed_transcript	ENSG00000260643	16q23.2	1.643	0	1.879	1.084	1.733	-0.577	0.00104	0.00509
113	XXbac-B461K10.4	processed_transcript	ENSG00000093100	22q11.21	1.327	0.128	7.733	4.501	1.718	-0.582	0.00811	0.0203
53	HAR1A	lincRNA	ENSG00000225978	20q13.33	1.71	0	1.124	0.655	1.717	-0.582	0.00064	0.00347
96	RP11-259N19.1	lincRNA	ENSG00000272711	2p12	1.418	0.128	3.934	2.304	1.708	-0.586	0.00466	0.0138
31	RP11-326I11.3	lincRNA	ENSG00000271646	4q35.1	1.966	0	1.476	0.87	1.698	-0.589	8.66e-05	0.000772
107	RP11-128A17.2	lincRNA	ENSG00000274444	15q14	1.345	0.128	1.681	0.991	1.697	-0.589	0.00725	0.0191
176	RP4-665J23.1	lincRNA	ENSG00000233593	1p22.2	0.974	0.626	7.837	4.641	1.688	-0.592	0.0522	0.0808
170	RP11-108M9.4	lincRNA	ENSG00000238142	1p36.13	1.029	0.434	17.741	10.522	1.686	-0.593	0.0403	0.0668
48	LINC00869	lincRNA	ENSG00000277147	1q21.2	1.801	0	5.914	3.523	1.679	-0.596	0.000322	0.00196
101	KCCAT211	lincRNA	ENSG00000231574	3q26.32	1.381	0.128	1.34	0.801	1.673	-0.598	0.00584	0.0166
69	TPTEP1	lincRNA	ENSG00000100181	22q11.1	1.558	0	12.768	7.655	1.668	-0.6	0.00187	0.00742
140	RP11-629O1.2	lincRNA	ENSG00000261220	8q24.22	1.193	0.192	3.027	1.815	1.668	-0.599	0.0173	0.0349
95	LINC01515	lincRNA	ENSG00000228065	10q21.3	1.424	0.128	5.699	3.427	1.663	-0.601	0.00448	0.0135
110	CATIP-AS1	processed_transcript	ENSG00000225062	2q35	1.339	0.128	1.131	0.68	1.663	-0.601	0.00755	0.0194
105	YTHDF3-AS1	lincRNA	ENSG00000270673	8q12.3	1.363	0.128	1.518	0.918	1.653	-0.605	0.00652	0.018
164	CH17-360D5.3	lincRNA	ENSG00000273760	10q11.22	1.065	0.434	5.699	3.481	1.637	-0.611	0.0337	0.058
82	RP11-353N14.4	lincRNA	ENSG00000262188	17q25.3	1.485	0	1.173	0.718	1.632	-0.613	0.00303	0.0104
132	RP11-834C11.4	lincRNA	ENSG00000250742	12q13.13	1.229	0.192	17.539	10.755	1.631	-0.613	0.0142	0.03
75	RP3-510D11.2	lincRNA	ENSG00000234546	1p36.22	1.534	0	1.445	0.888	1.628	-0.614	0.0022	0.00809
62	PAXIP1-AS1	lincRNA	ENSG00000273344	7q36.2	1.625	0	4.608	2.834	1.626	-0.615	0.00118	0.00532
81	RP11-338K17.8	lincRNA	ENSG00000255839	12q24.31	1.497	0	2.414	1.491	1.619	-0.618	0.00281	0.0098
72	KB-68A7.1	lincRNA	ENSG00000274225	21q22.3	1.54	0	1.146	0.709	1.617	-0.619	0.00212	0.00795
135	ERICD	lincRNA	ENSG00000280303	8q24.3	1.229	0.192	1.119	0.703	1.591	-0.628	0.0142	0.03
106	RP11-410L14.2	lincRNA	ENSG00000253948	8q22.2	1.345	0.128	3.235	2.038	1.587	-0.63	0.00728	0.0191
112	RP11-477N3.1	lincRNA	ENSG00000272156	2p16.2	1.333	0.128	1.146	0.723	1.585	-0.631	0.00783	0.0197
157	LINC00240	lincRNA	ENSG00000224843	6p22.2	1.102	0.434	2.934	1.852	1.584	-0.631	0.028	0.0508
24	RP11-352M15.2	lincRNA	ENSG00000273015	12q12	2.081	0	2.269	1.437	1.578	-0.634	3.23e-05	0.00035
83	RP11-10C24.2	lincRNA	ENSG00000271324	3p22.3	1.485	0	2.307	1.463	1.577	-0.634	0.00304	0.0104
90	LINC00623	lincRNA	ENSG00000226067	1p11.2	1.442	0	4.221	2.696	1.566	-0.639	0.00399	0.0125
187	RP11-157J24.2	lincRNA	ENSG00000272279	6p25.3	0.907	0.798	1.416	0.907	1.561	-0.641	0.0707	0.102
39	OIP5-AS1	processed_transcript	ENSG00000247556	15q15.1	1.911	0	27.137	17.403	1.559	-0.641	0.000136	0.00105
73	LINC01105	processed_transcript	ENSG00000232044	2p25.2	1.54	0	10.26	6.64	1.545	-0.647	0.00212	0.00795
66	RP11-295H24.4	lincRNA	ENSG00000275580	15q21.2	1.594	0	3.077	1.996	1.542	-0.649	0.00146	0.00616
55	AC007383.3	lincRNA	ENSG00000227946	2q33.3	1.68	0	6.542	4.247	1.54	-0.649	0.000799	0.00411
192	MIR100HG	lincRNA	ENSG00000255090	11q24.1	0.87	0.798	21.576	14.019	1.539	-0.65	0.0828	0.116
180	RP11-23D24.2	processed_transcript	ENSG00000238755	3q25.2	0.955	0.626	2.125	1.386	1.533	-0.652	0.0568	0.0866
124	FGF14-AS2	lincRNA	ENSG00000272143	13q33.1	1.272	0.128	1.828	1.194	1.532	-0.653	0.0112	0.0255
120	CTC-523E23.11	lincRNA	ENSG00000271109	19q13.11	1.281	0.128	1.184	0.778	1.522	-0.657	0.0106	0.0247
171	MEG3	lincRNA	ENSG00000214548	14q32.2	1.016	0.434	51.386	33.766	1.522	-0.657	0.0427	0.0699
190	AC104653.1	lincRNA	ENSG00000228857	2q14.1	0.876	0.798	1.144	0.752	1.521	-0.657	0.0807	0.114
153	RP11-379F4.6	lincRNA	ENSG00000272440	3q25.32	1.135	0.192	1.804	1.191	1.515	-0.66	0.0235	0.0445
184	RP11-112J3.16	lincRNA	ENSG00000227388	9p13.3	0.913	0.798	1.427	0.944	1.511	-0.662	0.0688	0.101
174	TYMSOS	processed_transcript	ENSG00000176912	18p11.32	1.004	0.626	1.987	1.32	1.505	-0.664	0.0453	0.0732
33	SRP14-AS1	lincRNA	ENSG00000248508	15q15.1	1.954	0	3.057	2.034	1.503	-0.665	9.58e-05	0.000817
154	DLG5-AS1	processed_transcript	ENSG00000233871	10q22.3	1.132	0.192	1.343	0.901	1.491	-0.67	0.024	0.0448
60	RP11-817O13.8	lincRNA	ENSG00000260274	15q24.2	1.625	0	1.565	1.052	1.488	-0.672	0.00118	0.00532
150	RP11-539L10.3	lincRNA	ENSG00000251580	4p16.1	1.144	0.192	3.893	2.621	1.485	-0.673	0.0225	0.043
197	RP11-707G18.1	lincRNA	ENSG00000278743	12p12.1	0.852	1.091	1.095	0.739	1.481	-0.675	0.0895	0.122
104	AC142472.6	lincRNA	ENSG00000276728	17q21.31	1.369	0.128	1.113	0.755	1.475	-0.678	0.00629	0.0175
129	CH17-189H20.1	lincRNA	ENSG00000274265	1q21.2	1.248	0.128	4.707	3.219	1.463	-0.684	0.0128	0.0282
147	RP5-902P8.10	lincRNA	ENSG00000230415	1p36.33	1.162	0.192	1.903	1.31	1.453	-0.688	0.0204	0.0399
68	LINC01547	lincRNA	ENSG00000183250	21q22.3	1.582	0	2.153	1.486	1.45	-0.69	0.00159	0.00657
50	CTD-3157E16.2	lincRNA	ENSG00000276855	17p12	1.759	0	16.053	11.107	1.445	-0.692	0.000446	0.00259
86	LINC00969	lincRNA	ENSG00000242086	3q29	1.467	0	12.981	8.986	1.445	-0.692	0.00342	0.0111
134	RP11-571M6.17	lincRNA	ENSG00000270039	12q14.1	1.229	0.192	3.17	2.199	1.442	-0.694	0.0142	0.03
188	LINC00173	processed_transcript	ENSG00000196668	12q24.22	0.895	0.798	1.447	1.003	1.442	-0.693	0.0746	0.107
76	RP11-727A23.5	processed_transcript	ENSG00000247137	11q14.1	1.528	0	3.756	2.609	1.44	-0.695	0.0023	0.00838
141	AC007228.9	lincRNA	ENSG00000268568	19q13.43	1.193	0.192	1.067	0.742	1.438	-0.695	0.0173	0.0349
130	GS1-124K5.4	lincRNA	ENSG00000237310	7q11.21	1.235	0.192	6.064	4.222	1.436	-0.696	0.0137	0.03
80	HAR1B	lincRNA	ENSG00000231133	20q13.33	1.497	0	1.286	0.902	1.427	-0.701	0.00281	0.0098
196	TTTY14	lincRNA	ENSG00000176728	Yq11.222	0.852	1.091	4.041	2.835	1.425	-0.702	0.0887	0.122
165	RP11-736K20.6	lincRNA	ENSG00000246523	11q14.2	1.059	0.434	1.295	0.911	1.421	-0.704	0.0347	0.0595
162	WFDC21P	processed_transcript	ENSG00000261040	17q23.1	1.077	0.434	18.936	13.337	1.42	-0.704	0.0317	0.0553
87	RP11-6N17.4	processed_transcript	ENSG00000264920	17q21.32	1.467	0	5.814	4.1	1.418	-0.705	0.00342	0.0111
149	RP11-504P24.8	lincRNA	ENSG00000272645	1q42.11	1.156	0.192	3.562	2.516	1.416	-0.706	0.0211	0.0409
139	RP11-535A5.1	lincRNA	ENSG00000273348	18q11.2	1.223	0.192	1.123	0.797	1.409	-0.71	0.0146	0.0302
116	RP11-638I8.1	lincRNA	ENSG00000272556	7p12.3	1.296	0.128	2.71	1.927	1.406	-0.711	0.0097	0.0236
138	CTC-559E9.1	lincRNA	ENSG00000266904	19p13.11	1.223	0.192	4.158	2.961	1.404	-0.712	0.0147	0.0302
172	KB-1410C5.5	lincRNA	ENSG00000271882	8q22.3	1.016	0.434	2.094	1.5	1.396	-0.717	0.0427	0.0699
144	RP11-385F7.1	lincRNA	ENSG00000270761	6p12.3	1.181	0.192	1.395	1.01	1.382	-0.724	0.0185	0.0367
133	RP11-589P10.5	lincRNA	ENSG00000262089	17p13.1	1.229	0.192	3.123	2.267	1.377	-0.726	0.0142	0.03
173	RP11-196G18.24	lincRNA	ENSG00000272993	1q21.2	1.004	0.626	4.237	3.084	1.374	-0.728	0.0453	0.0732
163	RP11-166P13.3	lincRNA	ENSG00000263004	17q22	1.065	0.434	1.624	1.182	1.373	-0.728	0.0337	0.058
123	ATP1A1-AS1	processed_transcript	ENSG00000203865	1p13.1	1.278	0.128	1.733	1.264	1.371	-0.729	0.0108	0.0247
142	SCAMP1-AS1	lincRNA	ENSG00000245556	5q14.1	1.181	0.192	3.804	2.776	1.37	-0.73	0.0185	0.0367
166	LINC01138	lincRNA	ENSG00000274020	1q21.2	1.047	0.434	4.211	3.074	1.37	-0.73	0.0368	0.0625
70	SNHG8	lincRNA	ENSG00000269893	4q26	1.552	0	141.959	104.472	1.359	-0.736	0.00195	0.00767
146	TRAM2-AS1	lincRNA	ENSG00000225791	6p12.2	1.162	0.192	4.346	3.2	1.358	-0.736	0.0204	0.0399
77	LINC00998	lincRNA	ENSG00000214194	7q31.1	1.521	0	46.586	34.345	1.356	-0.737	0.00239	0.00863
160	RP11-61K9.3	lincRNA	ENSG00000275964	13q12.11	1.083	0.434	2.804	2.071	1.354	-0.739	0.0307	0.0542
198	LINC00106	lincRNA	ENSG00000236871	Xp22.33	0.84	1.091	1.994	1.474	1.353	-0.739	0.0942	0.128
126	RP11-30K9.6	lincRNA	ENSG00000245975	15q21.3	1.254	0.128	1.16	0.859	1.351	-0.74	0.0124	0.0278
158	RP11-70D24.2	lincRNA	ENSG00000278058	16q23.2	1.095	0.434	2.414	1.787	1.351	-0.74	0.0289	0.0515
175	RP11-458F8.4	lincRNA	ENSG00000273142	7q11.21	0.992	0.626	3.872	2.879	1.345	-0.744	0.0479	0.0759
189	IQCH-AS1	lincRNA	ENSG00000259673	15q23	0.882	0.798	1.952	1.452	1.345	-0.744	0.0786	0.112
167	PSMG3-AS1	lincRNA	ENSG00000230487	7p22.3	1.035	0.434	3.217	2.402	1.339	-0.747	0.0391	0.0653
185	LINC00957	lincRNA	ENSG00000235314	7p13	0.913	0.798	1.857	1.388	1.338	-0.747	0.0688	0.101
199	LINC01003	lincRNA	ENSG00000261455	7q36.1	0.828	1.091	4.13	3.091	1.336	-0.749	0.0991	0.133
148	LINC01023	lincRNA	ENSG00000272523	5q21.3	1.162	0.192	5.014	3.755	1.335	-0.749	0.0204	0.0399
71	RP11-890B15.3	lincRNA	ENSG00000255455	11q24.3	1.546	0	3.992	3	1.331	-0.752	0.00203	0.00779
102	LINC00174	lincRNA	ENSG00000179406	7q11.21	1.375	0.128	2.366	1.782	1.327	-0.753	0.00606	0.017
136	LINC00339	lincRNA	ENSG00000218510	1p36.12	1.223	0.192	14.992	11.435	1.311	-0.763	0.0147	0.0302
195	RP11-162A12.4	lincRNA	ENSG00000278107	18q23	0.864	0.798	2.263	1.728	1.31	-0.763	0.085	0.118
64	RP4-758J18.2	processed_transcript	ENSG00000224870	1p36.33	1.613	0	11.205	8.57	1.307	-0.765	0.00128	0.00558
100	CD27-AS1	processed_transcript	ENSG00000215039	12p13.31	1.385	0.128	28.025	21.52	1.302	-0.768	0.00573	0.0164
191	KLF3-AS1	processed_transcript	ENSG00000231160	4p14	0.876	0.798	1.822	1.399	1.302	-0.768	0.0807	0.114
177	RP4-761J14.10	lincRNA	ENSG00000269892	12p13.31	0.974	0.626	1.045	0.804	1.3	-0.769	0.0522	0.0808
122	CTD-2270L9.4	lincRNA	ENSG00000260136	16p12.2	1.278	0.128	6.359	4.906	1.296	-0.772	0.0108	0.0247
111	RP11-553L6.5	lincRNA	ENSG00000259976	3q13.31	1.333	0.128	19.896	15.453	1.288	-0.777	0.00783	0.0197
183	RP11-10C24.3	lincRNA	ENSG00000271643	3p22.3	0.919	0.798	1.817	1.416	1.283	-0.779	0.067	0.0995
151	SNHG20	processed_transcript	ENSG00000234912	17q25.2	1.144	0.192	5.413	4.252	1.273	-0.785	0.0225	0.043
137	AC096772.6	lincRNA	ENSG00000244567	2q33.3	1.223	0.192	3.718	2.925	1.271	-0.787	0.0147	0.0302
179	GMDS-AS1	lincRNA	ENSG00000250903	6p25.3	0.968	0.626	5.03	3.969	1.267	-0.789	0.0537	0.0822
155	FLJ37035	lincRNA	ENSG00000224023	10q26.2	1.12	0.192	2.326	1.841	1.264	-0.791	0.0255	0.0473
169	SNHG11	processed_transcript	ENSG00000174365	20q11.23	1.035	0.434	10.366	8.203	1.264	-0.791	0.0391	0.0653
186	PKD1P6	processed_transcript	ENSG00000270580	16p13.11	0.913	0.798	2.964	2.348	1.263	-0.792	0.0688	0.101

## Sheet: S5B.2 lncRNA TCGA S1 vs othr DN
score.order	lncRNA	biotype	ENSG	cytoband	score	q.value (pct)	mean.tgt	mean.other	FC	-1/FC	wilcoxon.p	wilcoxon.p.adj.bh
69	GS1-600G8.5	lincRNA	ENSG00000235385	Xp22.2	-1.047	1.26	0.158	28.341	0.006	-179.831	0.0368	0.0625
94	RP11-865I6.2	lincRNA	ENSG00000254337	8q13.2	-0.861	1.868	0.071	7.724	0.009	-108.948	0.0776	0.111
18	RP11-702B10.2	lincRNA	ENSG00000273415	11q24.3	-1.804	0.434	0.021	1.435	0.015	-68.665	0.000247	0.0016
33	AC092484.1	lincRNA	ENSG00000225107	2q22.3	-1.518	0.798	0.056	3.387	0.017	-60.048	0.00204	0.00779
2	RP11-417E7.1	lincRNA	ENSG00000223485	6q27	-2.605	0	1.506	37.794	0.04	-25.104	1.96e-07	1.31e-05
47	LINC01234	lincRNA	ENSG00000249550	12q24.13	-1.308	1.098	0.096	2.132	0.045	-22.093	0.00902	0.0222
25	RP5-884M6.1	lincRNA	ENSG00000228742	7q22.3	-1.658	0.626	0.057	1.156	0.05	-20.182	0.000854	0.00432
128	XIST	lincRNA	ENSG00000229807	Xq13.2	-0.511	3.709	1.327	21.85	0.061	-16.471	0.307	0.349
5	LINC00941	lincRNA	ENSG00000235884	12p11.21	-2.465	0	0.114	1.486	0.077	-13.045	8.5e-07	2.62e-05
3	AC093850.2	lincRNA	ENSG00000230838	2q35	-2.605	0	0.356	3.869	0.092	-10.87	1.96e-07	1.31e-05
87	RP11-324L17.1	lincRNA	ENSG00000272551	2q31.1	-0.937	1.471	0.158	1.542	0.102	-9.768	0.0613	0.0924
92	RP13-714J12.1	lincRNA	ENSG00000274373	12q24.33	-0.879	1.596	0.124	1.108	0.112	-8.916	0.0775	0.111
6	APCDD1L-AS1	processed_transcript	ENSG00000231290	20q13.32	-2.434	0	0.159	1.143	0.139	-7.176	1.16e-06	3.1e-05
1	AC156455.1	processed_transcript	ENSG00000256546	12q24.31	-2.739	0	0.382	2.454	0.156	-6.417	4.47e-08	8.3e-06
66	AB019440.50	lincRNA	ENSG00000271201	14q32.33	-1.083	1.26	0.206	1.263	0.163	-6.135	0.0103	0.0246
9	RP11-161I6.2	lincRNA	ENSG00000263745	18p11.32	-2.173	0	0.539	2.773	0.194	-5.143	1.42e-05	0.000221
38	RP11-54H7.4	lincRNA	ENSG00000275216	13q33.3	-1.43	1.091	1.191	6.098	0.195	-5.12	0.00429	0.0131
12	LINC00632	lincRNA	ENSG00000203930	Xq27.1	-2.084	0	0.257	1.166	0.221	-4.531	3.14e-05	0.00035
62	RBAKDN	lincRNA	ENSG00000273313	7p22.1	-1.102	1.26	0.229	1.038	0.221	-4.528	0.028	0.0508
7	LINC00702	lincRNA	ENSG00000233117	10p15.1	-2.3	0	0.287	1.234	0.233	-4.299	4.33e-06	9.14e-05
48	ELFN1-AS1	lincRNA	ENSG00000236081	7p22.3	-1.302	1.098	0.503	2.019	0.249	-4.017	0.00933	0.0228
24	SFTA1P	lincRNA	ENSG00000225383	10p14	-1.668	0.626	5.93	23.598	0.251	-3.979	0.000872	0.00432
53	DUXAP8	processed_transcript	ENSG00000206195	22q11.1	-1.229	1.136	0.39	1.475	0.265	-3.779	0.0142	0.03
97	RP3-460G2.2	lincRNA	ENSG00000234147	6q24.1	-0.852	1.868	0.296	1.077	0.275	-3.633	0.0894	0.122
17	EML2-AS1	processed_transcript	ENSG00000267757	19q13.32	-1.856	0.192	0.398	1.393	0.285	-3.504	0.00021	0.00138
123	C6orf99	lincRNA	ENSG00000203711	6q25.3	-0.56	3.35	1.341	4.668	0.287	-3.48	0.265	0.308
89	LINC01116	lincRNA	ENSG00000163364	2q31.1	-0.907	1.596	3.136	10.571	0.297	-3.371	0.0707	0.102
11	AC007879.7	lincRNA	ENSG00000229647	2q33.3	-2.148	0	0.371	1.211	0.307	-3.261	1.78e-05	0.000238
55	RP11-15A1.3	lincRNA	ENSG00000267058	19q13.31	-1.199	1.158	0.576	1.817	0.317	-3.157	0.0168	0.0344
64	LINC00961	lincRNA	ENSG00000235387	9p13.3	-1.095	1.26	0.396	1.085	0.366	-2.736	0.0289	0.0515
52	H19	processed_transcript	ENSG00000130600	11p15.5	-1.229	1.136	396.603	1020.94	0.388	-2.574	0.0142	0.03
8	GAS6-AS2	lincRNA	ENSG00000272695	13q34	-2.179	0	0.732	1.876	0.39	-2.563	1.35e-05	0.000221
28	RP11-482H16.1	processed_transcript	ENSG00000271894	2p16.1	-1.613	0.626	0.71	1.818	0.39	-2.563	0.00128	0.00558
43	MIR503HG	lincRNA	ENSG00000223749	Xq26.3	-1.345	1.098	1.727	4.389	0.393	-2.541	0.00728	0.0191
21	RP11-394O4.5	lincRNA	ENSG00000269936	5q32	-1.734	0.434	0.516	1.304	0.395	-2.529	0.000535	0.00298
16	RP11-567M16.2	lincRNA	ENSG00000267409	18q23	-1.868	0.192	0.54	1.319	0.41	-2.44	0.000191	0.00134
31	LINC00165	lincRNA	ENSG00000261706	21q22.3	-1.549	0.798	0.484	1.18	0.41	-2.438	0.00179	0.00722
37	ZNF883	lincRNA	ENSG00000228623	9q32	-1.43	1.091	0.942	2.292	0.411	-2.433	0.00431	0.0131
20	RP5-875H18.9	lincRNA	ENSG00000276851	17q21.33	-1.747	0.434	1.221	2.885	0.423	-2.363	0.000488	0.00276
4	RP11-479G22.8	lincRNA	ENSG00000273038	10p11.22	-2.477	0	1.083	2.495	0.434	-2.305	7.51e-07	2.62e-05
32	RP11-65J21.3	lincRNA	ENSG00000262454	16p13.12	-1.546	0.798	1.08	2.479	0.436	-2.296	0.00203	0.00779
19	AC004540.5	lincRNA	ENSG00000214870	7p15.2	-1.777	0.434	0.515	1.167	0.441	-2.266	0.000388	0.00229
23	GAPLINC	lincRNA	ENSG00000266835	18p11.31	-1.692	0.626	0.866	1.961	0.441	-2.266	0.000731	0.00381
60	LINC00346	lincRNA	ENSG00000255874	13q34	-1.132	1.26	0.766	1.734	0.442	-2.262	0.024	0.0448
67	RP11-760H22.2	lincRNA	ENSG00000254343	8q24.12	-1.077	1.26	1.571	3.519	0.446	-2.24	0.0317	0.0553
27	MIR155HG	lincRNA	ENSG00000234883	21q21.3	-1.625	0.626	0.941	2.086	0.451	-2.215	0.00118	0.00532
50	AC133644.2	lincRNA	ENSG00000280721	2p11.2	-1.278	1.098	0.944	2.041	0.463	-2.162	0.0108	0.0247
63	MIAT	lincRNA	ENSG00000225783	22q12.1	-1.095	1.26	0.502	1.051	0.478	-2.093	0.0289	0.0515
119	RP11-536O18.1	lincRNA	ENSG00000226197	9p23	-0.615	2.961	0.73	1.485	0.491	-2.035	0.221	0.264
110	LINC01235	lincRNA	ENSG00000270547	9p23	-0.736	2.309	1.324	2.674	0.495	-2.02	0.142	0.181
26	ZFPM2-AS1	processed_transcript	ENSG00000251003	8q23.1	-1.637	0.626	0.956	1.92	0.498	-2.007	0.00108	0.00516
101	CASC15	lincRNA	ENSG00000272168	6p22.3	-0.797	2.093	1.95	3.861	0.505	-1.98	0.112	0.148
116	FOXD1-AS1	lincRNA	ENSG00000247993	5q13.2	-0.672	2.584	2.016	3.979	0.507	-1.974	0.181	0.223
58	RP11-160O5.1	lincRNA	ENSG00000263470	17q24.1	-1.144	1.158	0.544	1.064	0.511	-1.956	0.0225	0.043
74	CECR7	lincRNA	ENSG00000237438	22q11.1	-1.004	1.471	0.594	1.155	0.514	-1.945	0.0453	0.0732
71	CTD-3193O13.11	lincRNA	ENSG00000268120	19p13.2	-1.035	1.26	0.638	1.234	0.517	-1.936	0.0391	0.0653
75	LINC00960	lincRNA	ENSG00000242516	3p12.3	-0.998	1.471	0.891	1.721	0.518	-1.932	0.0466	0.0747
78	RP11-42O15.3	lincRNA	ENSG00000271992	1p31.1	-0.992	1.471	0.549	1.059	0.518	-1.929	0.0479	0.0759
14	C17orf100	lincRNA	ENSG00000256806	17p13.1	-1.881	0.192	0.794	1.499	0.529	-1.889	0.000173	0.00131
133	AC025811.3	lincRNA	ENSG00000270947	19p12	-0.362	5.288	0.622	1.176	0.529	-1.889	0.419	0.465
86	ZNF667-AS1	lincRNA	ENSG00000166770	19q13.43	-0.937	1.471	5.588	10.278	0.544	-1.839	0.0617	0.0927
109	RP5-1061H20.4	lincRNA	ENSG00000177788	1q42.13	-0.746	2.309	0.641	1.18	0.544	-1.839	0.138	0.176
29	CMB9-22P13.1	lincRNA	ENSG00000173727	11q13.1	-1.601	0.798	1.077	1.972	0.546	-1.832	0.0014	0.00604
22	PKI55	lincRNA	ENSG00000260804	2q35	-1.704	0.626	2.714	4.915	0.552	-1.811	0.000669	0.00358
41	CTC-459F4.3	lincRNA	ENSG00000267575	19q11	-1.357	1.091	3.719	6.585	0.565	-1.771	0.00677	0.0185
34	MIRLET7BHG	lincRNA	ENSG00000197182	22q13.31	-1.479	1.091	0.744	1.317	0.565	-1.769	0.00316	0.0106
76	PCAT19	lincRNA	ENSG00000267107	19q13.2	-0.998	1.471	0.826	1.384	0.597	-1.674	0.0466	0.0747
56	RP1-122P22.2	lincRNA	ENSG00000233895	20p11.23	-1.193	1.158	1.049	1.722	0.609	-1.642	0.0173	0.0349
100	TEX41	lincRNA	ENSG00000226674	2q22.3	-0.828	1.868	1.055	1.729	0.61	-1.639	0.0991	0.133
91	LINC01605	lincRNA	ENSG00000253161	8p11.23	-0.901	1.596	0.661	1.071	0.618	-1.619	0.0726	0.105
95	RP11-791G15.2	lincRNA	ENSG00000272275	2p25.1	-0.858	1.868	1.574	2.543	0.619	-1.616	0.0872	0.12
13	CTB-193M12.5	lincRNA	ENSG00000280206	16p13.11	-2.081	0	4.37	7.024	0.622	-1.607	3.23e-05	0.00035
40	LINC01094	lincRNA	ENSG00000251442	4q21.21	-1.357	1.091	2.71	4.165	0.651	-1.537	0.00677	0.0185
35	CTD-3252C9.4	lincRNA	ENSG00000267519	19p13.12	-1.479	1.091	7.405	11.28	0.656	-1.523	0.00316	0.0106
107	GS1-259H13.2	lincRNA	ENSG00000244219	7q22.1	-0.761	2.093	0.896	1.357	0.66	-1.515	0.13	0.168
70	CTD-2054N24.2	lincRNA	ENSG00000259363	15q26.3	-1.035	1.26	0.99	1.495	0.662	-1.51	0.0391	0.0653
15	AC005562.1	processed_transcript	ENSG00000214719	17q11.2	-1.874	0.192	2.148	3.221	0.667	-1.5	0.000182	0.00133
49	RP11-395G23.3	lincRNA	ENSG00000254615	8q23.1	-1.278	1.098	0.76	1.141	0.667	-1.5	0.0108	0.0247
113	RP11-89K11.1	lincRNA	ENSG00000259658	15q26.3	-0.7	2.309	1.008	1.506	0.669	-1.494	0.163	0.204
44	RP11-12G12.7	lincRNA	ENSG00000274605	13q32.3	-1.345	1.098	1.336	1.989	0.672	-1.489	0.00728	0.0191
81	LINC00882	lincRNA	ENSG00000242759	3q13.12	-0.974	1.471	1.156	1.715	0.674	-1.484	0.0522	0.0808
105	PAX8-AS1	processed_transcript	ENSG00000189223	2q14.1	-0.779	2.093	19.142	28.243	0.678	-1.476	0.121	0.158
80	LINC00265	lincRNA	ENSG00000188185	7p14.1	-0.98	1.471	0.888	1.307	0.679	-1.472	0.0508	0.0799
82	SHANK3	processed_transcript	ENSG00000251322	22q13.33	-0.974	1.471	1.925	2.82	0.683	-1.465	0.0522	0.0808
120	RP3-522D1.1	lincRNA	ENSG00000224167	1p13.2	-0.572	3.35	1.034	1.513	0.683	-1.464	0.255	0.297
99	RP11-38M8.1	lincRNA	ENSG00000273297	7q33	-0.834	1.868	0.736	1.074	0.685	-1.461	0.0966	0.13
45	OLMALINC	lincRNA	ENSG00000235823	10q24.31	-1.339	1.098	0.778	1.126	0.691	-1.447	0.00755	0.0194
30	LINC00997	lincRNA	ENSG00000281332	7p14.3	-1.57	0.798	1.059	1.529	0.693	-1.443	0.00172	0.00704
77	LINC00662	lincRNA	ENSG00000261824	19q11	-0.992	1.471	5.963	8.553	0.697	-1.434	0.0479	0.0759
54	RP11-488C13.7	lincRNA	ENSG00000258610	14q24.3	-1.223	1.136	3.363	4.81	0.699	-1.43	0.0147	0.0302
125	RP11-274B21.14	processed_transcript	ENSG00000242588	7q32.1	-0.554	3.35	0.904	1.291	0.7	-1.428	0.271	0.312
42	RP11-428J1.5	lincRNA	ENSG00000272142	6p25.1	-1.351	1.098	0.841	1.2	0.701	-1.427	0.00702	0.019
108	ZNF582-AS1	lincRNA	ENSG00000267454	19q13.43	-0.755	2.093	1.004	1.429	0.702	-1.424	0.133	0.17
103	RP11-472N13.3	lincRNA	ENSG00000237797	10p11.22	-0.785	2.093	0.823	1.168	0.704	-1.42	0.118	0.155
126	RP11-373D23.3	lincRNA	ENSG00000270210	2p23.2	-0.542	3.35	2.197	3.113	0.706	-1.417	0.281	0.322
51	RP11-47A8.5	lincRNA	ENSG00000272933	10q24.32	-1.248	1.136	1.035	1.461	0.708	-1.412	0.0128	0.0282
117	RP11-344B5.2	lincRNA	ENSG00000224307	9q34.11	-0.663	2.584	1.294	1.818	0.712	-1.405	0.187	0.229
46	RP11-78J21.7	processed_transcript	ENSG00000273784	13q14.3	-1.333	1.098	0.821	1.149	0.715	-1.399	0.00783	0.0197
61	CTD-2538C1.2	lincRNA	ENSG00000267475	19q13.11	-1.102	1.26	1.028	1.416	0.726	-1.377	0.028	0.0508
132	RNU11	lincRNA	ENSG00000270103	1p35.3	-0.371	5.288	2.501	3.445	0.726	-1.377	0.442	0.486
131	RP11-47L3.1	lincRNA	ENSG00000267364	17q12	-0.45	4.256	1.069	1.468	0.729	-1.372	0.371	0.416
72	CBR3-AS1	processed_transcript	ENSG00000236830	21q22.12	-1.029	1.26	0.8	1.095	0.731	-1.368	0.0403	0.0668
39	CTD-2587H24.14	processed_transcript	ENSG00000276570	19q13.42	-1.412	1.091	0.928	1.267	0.732	-1.365	0.00484	0.0143
118	PCED1B-AS1	processed_transcript	ENSG00000247774	12q13.11	-0.639	2.794	15.746	21.498	0.732	-1.365	0.203	0.245
98	RP11-1149O23.3	processed_transcript	ENSG00000246582	8p21.3	-0.846	1.868	1.349	1.834	0.735	-1.36	0.0918	0.125
57	AC005682.5	processed_transcript	ENSG00000228649	7p15.3	-1.156	1.158	1.26	1.706	0.739	-1.354	0.0211	0.0409
65	SNHG4	processed_transcript	ENSG00000281398	5q31.2	-1.095	1.26	1.4	1.889	0.741	-1.349	0.0289	0.0515
59	FTX	lincRNA	ENSG00000230590	Xq13.2	-1.132	1.26	1.402	1.887	0.743	-1.346	0.024	0.0448
90	RP11-14N7.2	lincRNA	ENSG00000232527	1q21.1	-0.907	1.596	26.413	35.443	0.745	-1.342	0.0707	0.102
104	CH17-340M24.3	lincRNA	ENSG00000197180	Xq28	-0.779	2.093	4.87	6.52	0.747	-1.339	0.121	0.158
102	AC012146.7	processed_transcript	ENSG00000234327	17p13.2	-0.797	2.093	3.468	4.596	0.755	-1.325	0.112	0.148
112	AC108488.4	lincRNA	ENSG00000242282	2p25.3	-0.724	2.309	4.043	5.282	0.766	-1.306	0.149	0.188
127	RP11-834C11.14	processed_transcript	ENSG00000273046	12q13.13	-0.523	3.709	1.039	1.349	0.77	-1.299	0.298	0.339
83	RP11-681H18.2	lincRNA	ENSG00000277801	14q31.3	-0.968	1.471	4.458	5.766	0.773	-1.294	0.0537	0.0822
36	LINC00294	lincRNA	ENSG00000280798	11p13	-1.461	1.091	4.151	5.354	0.775	-1.29	0.00356	0.0115
68	CTD-2349P21.9	lincRNA	ENSG00000266490	17q11.2	-1.065	1.26	1.209	1.56	0.775	-1.29	0.0337	0.058
129	LINC00900	lincRNA	ENSG00000246100	11q23.3	-0.505	3.709	0.879	1.134	0.775	-1.29	0.315	0.357
106	LINC01128	processed_transcript	ENSG00000228794	1p36.33	-0.773	2.093	2.403	3.097	0.776	-1.289	0.124	0.161
85	CTB-31O20.2	lincRNA	ENSG00000261526	19p13.3	-0.94	1.471	2.325	2.994	0.776	-1.288	0.0609	0.0922
115	RP11-93H24.3	lincRNA	ENSG00000273723	13q14.3	-0.676	2.584	1.143	1.469	0.779	-1.284	0.179	0.221
79	LINC00641	processed_transcript	ENSG00000258441	14q11.2	-0.986	1.471	1.532	1.963	0.78	-1.281	0.0493	0.0778
122	SNHG14	processed_transcript	ENSG00000224078	15q11.2	-0.572	3.35	9.932	12.723	0.781	-1.281	0.255	0.297
84	RP1-151F17.2	lincRNA	ENSG00000272341	6p22.3	-0.943	1.471	1.163	1.486	0.783	-1.277	0.06	0.0911
111	CTD-2341M24.1	lincRNA	ENSG00000258733	14q31.3	-0.73	2.309	0.901	1.149	0.784	-1.275	0.146	0.185
73	SNHG1	processed_transcript	ENSG00000255717	11q12.3	-1.016	1.471	42.112	53.651	0.785	-1.274	0.0427	0.0699
96	RP11-567M16.6	lincRNA	ENSG00000274828	18q23	-0.858	1.868	1.195	1.517	0.788	-1.269	0.0872	0.12
121	LINC00883	lincRNA	ENSG00000243701	3q13.12	-0.572	3.35	2.466	3.127	0.788	-1.268	0.255	0.297
88	LINC00630	lincRNA	ENSG00000223546	Xq22.1	-0.913	1.596	0.98	1.241	0.79	-1.266	0.0688	0.101
93	RP11-379B18.5	processed_transcript	ENSG00000241288	3q21.2	-0.876	1.596	1.585	2.005	0.791	-1.265	0.0807	0.114
114	RP11-33O4.1	lincRNA	ENSG00000272644	2q35	-0.694	2.584	1.577	1.977	0.798	-1.254	0.167	0.209
124	RP11-89C3.4	lincRNA	ENSG00000271584	11q23.1	-0.557	3.35	1.175	1.471	0.799	-1.252	0.268	0.311
130	LINC01558	lincRNA	ENSG00000146521	6q27	-0.493	3.857	1.244	0.948	1.312	-0.762	0.327	0.368
10	AC006262.5	lincRNA	ENSG00000268621	19q13.32	-2.151	0	4.535	2.664	1.702	-0.587	1.43e-05	0.000221

## Sheet: S5B.3 miR TCGA S1 vs other UP
score.order	mRNA	cytoband(s)	score	q.value (pct)	mean.tgt	mean.other	FC(1 vs other)	-1/FC	wilcoxon.p	wilcoxon.p.adj.bh
5	miR-100-5p	11q24.1	2.091	0	29471.3	12152.2	2.425	-0.412	2.98e-05	0.000785
51	miR-1247-5p	14q32.31	1.07	0.349	13.751	5.688	2.417	-0.414	0.033	0.0573
14	miR-95-3p	4p16.1	1.746	0	22.08	9.307	2.372	-0.422	0.000492	0.00324
23	miR-323b-3p	14q32.31	1.539	0	19.891	8.473	2.347	-0.426	0.00213	0.00841
16	miR-203a	14q32.33	1.711	0	728.687	318.924	2.285	-0.438	0.000636	0.00347
4	miR-193a-3p	17q11.2	2.215	0	43.256	18.977	2.279	-0.439	9.72e-06	0.000307
1	miR-29b-2-5p	1q32.2	2.326	0	59.939	26.931	2.226	-0.449	3.41e-06	0.000278
2	miR-148b-3p	12q13.13	2.277	0	227.32	103.966	2.186	-0.457	5.43e-06	0.000278
29	miR-652-3p	Xq23	1.422	0	29.195	13.484	2.165	-0.462	0.00457	0.0142
3	miR-193a-5p	17q11.2	2.25	0	1528.25	728.044	2.099	-0.476	7.04e-06	0.000278
25	miR-378c	10q26.3	1.511	0	28.02	13.534	2.07	-0.483	0.00256	0.00919
15	miR-361-3p	Xq21.2	1.732	0	323.556	158.087	2.047	-0.489	0.000546	0.00345
12	miR-1180-3p	17p11.2	1.822	0	56.121	27.64	2.03	-0.493	0.000276	0.00218
10	miR-1287-5p	10q24.2	1.87	0	48.882	24.393	2.004	-0.499	0.000189	0.00196
43	miR-532-3p	Xp11.23	1.221	0.192	62.098	31.619	1.964	-0.509	0.0149	0.0314
7	miR-29c-3p	1q32.2	1.925	0	2124.17	1093.19	1.943	-0.515	0.000121	0.00185
46	miR-514a-3p	Xq27.3	1.18	0.192	96.203	49.519	1.943	-0.515	0.0186	0.0363
33	let-7i-3p	12q14.1	1.346	0	110.976	57.748	1.922	-0.52	0.00727	0.0179
6	miR-29b-3p	1q32.2,7q32.3	2.001	0	1742.07	967.876	1.8	-0.556	6.46e-05	0.00146
39	miR-195-5p	17p13.1	1.263	0.192	78.793	44.554	1.768	-0.565	0.0118	0.0266
31	miR-497-5p	17p13.1	1.366	0	53.614	31.694	1.692	-0.591	0.00642	0.0175
37	miR-508-3p	Xq27.3	1.339	0	308.626	183.084	1.686	-0.593	0.00757	0.0184
38	miR-509-3p	Xq27.3	1.325	0	105.134	62.999	1.669	-0.599	0.00822	0.0197
63	miR-500a-5p	Xp11.23	0.766	1.748	11.055	6.641	1.665	-0.601	0.127	0.173
64	miR-500b-5p	Xp11.23	0.766	1.748	11.055	6.641	1.665	-0.601	0.127	0.173
27	miR-1301-3p	2p23.3	1.484	0	18.497	11.123	1.663	-0.601	0.00307	0.0105
20	miR-125b-5p	11q24.1,21q21.1	1.553	0	2124.82	1286.68	1.651	-0.606	0.00195	0.00811
24	miR-136-5p	14q32.2	1.518	0	118.199	71.698	1.649	-0.607	0.00245	0.00919
28	miR-505-5p	Xq27.1	1.463	0	13.655	8.312	1.643	-0.609	0.00351	0.0118
9	miR-29c-5p	1q32.2	1.905	0	30.667	18.764	1.634	-0.612	0.000143	0.00185
13	miR-331-3p	12q22	1.746	0	25.744	16.173	1.592	-0.628	0.000492	0.00324
8	miR-30d-5p	8q24.22	1.911	0	10664.6	6718.74	1.587	-0.63	0.000136	0.00185
18	miR-130a-3p	11q12.1	1.629	0	341.733	215.479	1.586	-0.631	0.00115	0.00551
17	miR-101-3p	1p31.3,9p24.1	1.642	0	11673.6	7378.63	1.582	-0.632	0.00105	0.00518
42	miR-539-5p	14q32.31	1.228	0.192	21.542	13.633	1.58	-0.633	0.0143	0.0305
70	miR-222-3p	Xp11.3	0.531	4.522	86.384	54.871	1.574	-0.635	0.291	0.341
19	miR-200a-3p	1p36.33	1.56	0	49.705	32.014	1.553	-0.644	0.00186	0.00811
49	miR-107	10q23.31	1.077	0.349	86.943	56.162	1.548	-0.646	0.0319	0.056
11	miR-22-3p	17p13.3	1.856	0	192726	125008	1.542	-0.649	0.000211	0.00196
40	miR-34a-5p	1p36.22	1.242	0.192	311.954	204.714	1.524	-0.656	0.0132	0.029
69	miR-502-3p	Xp11.23	0.545	4.522	13.146	8.638	1.522	-0.657	0.279	0.329
22	miR-26b-3p	2q35	1.539	0	26.706	17.753	1.504	-0.665	0.00213	0.00841
68	miR-330-5p	19q13.32	0.6	3.947	16.366	10.937	1.496	-0.668	0.233	0.288
58	miR-1976	1p36.11	0.883	1.29	12.904	8.645	1.493	-0.67	0.0785	0.117
44	miR-452-5p	Xq28	1.215	0.192	252.403	171.028	1.476	-0.678	0.0154	0.0316
67	miR-221-3p	Xp11.3	0.607	3.947	298.811	207.098	1.443	-0.693	0.227	0.282
61	miR-99b-3p	19q13.41	0.856	1.29	93.016	64.633	1.439	-0.695	0.0883	0.128
21	miR-365a-3p	16p13.12	1.553	0	107.7	75.157	1.433	-0.698	0.00195	0.00811
56	miR-210-3p	11p15.5	0.897	1.29	1291.35	914.145	1.413	-0.708	0.0739	0.111
59	miR-127-5p	14q32.2	0.876	1.29	563.507	400.245	1.408	-0.71	0.0808	0.119
30	miR-151a-5p	8q24.3	1.387	0	124.157	88.313	1.406	-0.711	0.00565	0.0159
55	miR-192-5p	11q13.1	0.973	0.799	544.464	388.399	1.402	-0.713	0.0525	0.0838
32	miR-29a-3p	7q32.3	1.353	0	8621.07	6206.67	1.389	-0.72	0.00697	0.0179
47	miR-22-5p	17p13.3	1.146	0.192	73.178	52.876	1.384	-0.723	0.0224	0.0421
57	miR-374a-3p	Xq13.2	0.897	1.29	1135.51	826.666	1.374	-0.728	0.0739	0.111
35	miR-24-1-5p	9q22.32	1.346	0	21.168	15.479	1.368	-0.731	0.00727	0.0179
53	miR-370-3p	14q32.2	1.063	0.349	19.294	14.111	1.367	-0.731	0.0341	0.0579
26	miR-30e-5p	1p34.2	1.504	0	10130.7	7467.83	1.357	-0.737	0.00268	0.00941
41	miR-576-5p	4q25	1.242	0.192	20.05	14.877	1.348	-0.742	0.0132	0.029
36	miR-30e-3p	1p34.2	1.346	0	5350.26	4007.13	1.335	-0.749	0.00727	0.0179
65	miR-532-5p	Xp11.23	0.766	1.748	1287.79	966.026	1.333	-0.75	0.127	0.173
50	miR-148a-5p	7p15.2	1.077	0.349	38.982	29.323	1.329	-0.752	0.0319	0.056
60	miR-362-5p	Xp11.23	0.869	1.29	15.319	11.543	1.327	-0.754	0.0833	0.122
52	miR-324-5p	17p13.1	1.063	0.349	34.615	26.314	1.315	-0.76	0.0341	0.0579
62	miR-151a-3p	8q24.3	0.849	1.29	1703.41	1303.02	1.307	-0.765	0.0909	0.131
66	let-7a-2-3p	11q24.1	0.718	2.337	23.48	18.265	1.286	-0.778	0.153	0.205
34	miR-186-5p	1p31.1	1.346	0	339.407	264.572	1.283	-0.78	0.00727	0.0179
48	miR-26b-5p	2q35	1.125	0.192	857.018	673.981	1.272	-0.786	0.0249	0.0457
45	miR-26a-5p	3p22.2,12q14.1	1.18	0.192	2418.52	1908.78	1.267	-0.789	0.0186	0.0363
54	miR-323a-3p	14q32.31	0.994	0.653	12.233	9.752	1.255	-0.797	0.0476	0.0783

## Sheet: S5B.4 miR TCGA S1 vs other DN
score.order	mRNA	cytoband	score	q.value (pct)	mean.tgt	mean.other	FC	-1/FC	wilcoxon.p	wilcoxon.p.adj.bh
36	miR-206	6p12.2	-1.173	0.349	4.19	104.72	0.04	-24.995	0.0193	0.0372
5	miR-133a-3p	18q11.2,20q13.33	-1.863	0	2.658	45.824	0.058	-17.238	0.0002	0.00196
4	miR-1	18q11.2,20q13.33	-1.898	0	6.337	89.983	0.07	-14.2	0.000152	0.00185
31	miR-483-3p	11p15.5	-1.277	0.211	1.68	13.504	0.124	-8.038	0.0109	0.025
22	miR-204-5p	9q21.12	-1.422	0.211	10.793	63.184	0.171	-5.854	0.00457	0.0142
58	miR-483-5p	11p15.5	-0.649	3.947	3.48	17.1	0.204	-4.914	0.197	0.251
8	miR-217	2p16.1	-1.829	0	13.899	66.328	0.21	-4.772	0.000262	0.00218
44	miR-9-5p	1q22,5q14.3,15q26.1	-0.987	1.29	145.696	544.393	0.268	-3.737	0.0492	0.0793
21	miR-503-5p	Xq26.3	-1.435	0.211	7.095	25.766	0.275	-3.631	0.00419	0.0135
64	miR-486-5p	8p11.21	-0.559	4.522	70.796	230.932	0.307	-3.262	0.267	0.32
6	miR-143-5p	5q32	-1.863	0	10.56	33.514	0.315	-3.174	0.0002	0.00196
50	miR-335-3p	7q32.2	-0.821	2.337	270.572	809.219	0.334	-2.991	0.102	0.144
9	miR-214-5p	1q24.3	-1.787	0	14.404	41.51	0.347	-2.882	0.00036	0.00271
10	miR-145-5p	5q32	-1.76	0	297.636	857.445	0.347	-2.881	0.000444	0.00319
30	miR-337-3p	14q32.2	-1.297	0.211	23.308	66.075	0.353	-2.835	0.00966	0.0224
13	miR-199a-5p	1q24.3,19p13.2	-1.711	0	552.999	1555.65	0.355	-2.813	0.000636	0.00347
15	miR-143-3p	5q32	-1.649	0	11126.4	29778.2	0.374	-2.676	0.000996	0.00508
7	miR-145-3p	5q32	-1.842	0	9.284	24.152	0.384	-2.601	0.000235	0.00206
28	miR-126-5p	9q34.3	-1.359	0.211	68.14	160.247	0.425	-2.352	0.00669	0.0179
32	miR-126-3p	9q34.3	-1.228	0.349	1051.23	2404.59	0.437	-2.287	0.0143	0.0305
54	miR-758-3p	14q32.31	-0.683	3.947	10.791	23.291	0.463	-2.158	0.174	0.229
3	miR-24-2-5p	19p13.13	-1.918	0	14.289	30.305	0.471	-2.121	0.000128	0.00185
26	miR-424-5p	Xq26.3	-1.387	0.211	66.088	139.783	0.473	-2.115	0.00565	0.0159
23	miR-450b-5p	Xq26.3	-1.415	0.211	16.431	34.161	0.481	-2.079	0.00477	0.0145
12	miR-181a-2-3p	9q33.3	-1.711	0	352.139	727.278	0.484	-2.065	0.000636	0.00347
17	miR-625-3p	14q23.3	-1.587	0	52.911	108.162	0.489	-2.044	0.00154	0.00695
18	miR-199a-3p	1q24.3,19p13.2	-1.511	0	1355.98	2697.64	0.503	-1.989	0.00256	0.00919
19	miR-199b-3p	9q34.11	-1.511	0	1351.56	2686.18	0.503	-1.987	0.00256	0.00919
49	miR-155-5p	21q21.3	-0.835	2.337	241.23	477.891	0.505	-1.981	0.0963	0.137
1	miR-23a-3p	19p13.13	-2.284	0	2060.55	3952.72	0.521	-1.918	5.08e-06	0.000278
61	miR-335-5p	7q32.2	-0.593	4.522	32.681	62.449	0.523	-1.911	0.238	0.292
56	miR-135b-5p	1q32.1	-0.662	3.947	10.646	20.262	0.525	-1.903	0.187	0.242
2	miR-27a-3p	19p13.13	-1.96	0	698.943	1319.34	0.53	-1.888	9.13e-05	0.0018
11	miR-181c-3p	19p13.13	-1.725	0	26.446	49.623	0.533	-1.876	0.000574	0.00347
14	miR-181a-3p	1q32.1	-1.691	0	121.506	227.662	0.534	-1.874	0.00074	0.0039
27	miR-542-3p	Xq26.3	-1.366	0.211	219.283	409.218	0.536	-1.866	0.00642	0.0175
41	miR-30c-2-3p	6q13	-1.035	1.29	30.656	57.179	0.536	-1.865	0.0391	0.0657
47	miR-199b-5p	9q34.11	-0.945	1.381	152.175	282.025	0.54	-1.853	0.0596	0.0923
34	miR-744-3p	17p12	-1.208	0.349	5.943	10.815	0.549	-1.82	0.016	0.0324
40	miR-450a-5p	Xq26.3	-1.09	0.799	9.104	16.025	0.568	-1.76	0.0297	0.0533
16	let-7e-3p	19q13.41	-1.608	0	9.117	15.284	0.597	-1.676	0.00133	0.00618
35	miR-218-5p	4p15.31,5q34	-1.18	0.349	103.197	169.909	0.607	-1.646	0.0186	0.0363
38	miR-874-3p	5q31.2	-1.139	0.653	12.121	19.891	0.609	-1.641	0.0232	0.0431
57	miR-196b-5p	7p15.2	-0.656	3.947	72.424	118.139	0.613	-1.631	0.192	0.247
20	miR-130b-3p	22q11.21	-1.435	0.211	6.643	10.535	0.631	-1.586	0.00419	0.0135
25	miR-132-3p	17p13.3	-1.387	0.211	131.124	204.788	0.64	-1.562	0.00565	0.0159
63	miR-675-3p	11p15.5	-0.573	4.522	70.358	103.909	0.677	-1.477	0.255	0.308
52	miR-106a-5p	Xq26.2	-0.745	2.703	7.199	10.548	0.682	-1.465	0.138	0.186
29	miR-130b-5p	22q11.21	-1.304	0.211	8.468	12.29	0.689	-1.451	0.00928	0.0219
53	miR-425-5p	3p21.31	-0.704	2.703	98.672	142.889	0.691	-1.448	0.161	0.214
59	miR-27a-5p	19p13.13	-0.642	3.947	11.121	15.727	0.707	-1.414	0.202	0.255
60	miR-96-5p	7q32.2	-0.628	3.947	15.077	21.237	0.71	-1.409	0.212	0.266
37	miR-181a-5p	1q32.1,9q33.3	-1.159	0.349	1403.16	1962.8	0.715	-1.399	0.0208	0.0396
33	miR-146b-5p	10q24.32	-1.215	0.349	957.125	1317.03	0.727	-1.376	0.0154	0.0316
55	miR-21-3p	17q23.1	-0.676	3.947	1510.36	2049.11	0.737	-1.357	0.178	0.232
24	miR-93-5p	7q22.1	-1.408	0.211	3616.6	4894.69	0.739	-1.353	0.00498	0.0148
43	miR-181b-5p	1q32.1,9q33.3	-0.987	1.29	300.693	406.281	0.74	-1.351	0.0492	0.0793
45	miR-769-5p	19q13.32	-0.966	1.29	10.892	14.711	0.74	-1.351	0.0542	0.0856
46	miR-197-3p	1p13.3	-0.945	1.381	236.098	318.589	0.741	-1.349	0.0596	0.0923
51	let-7b-3p	22q13.31	-0.814	2.337	12.55	16.491	0.761	-1.314	0.105	0.147
62	miR-708-5p	11q14.1	-0.587	4.522	35.258	46.163	0.764	-1.309	0.244	0.297
48	miR-152-3p	17q21.32	-0.925	1.381	221.426	288.897	0.766	-1.305	0.0654	0.1
42	miR-17-5p	13q31.3	-1.028	1.29	284.267	367.29	0.774	-1.292	0.0404	0.0672
39	miR-24-3p	9q22.32,19p13.13	-1.111	0.653	1323.55	1708.1	0.775	-1.291	0.0268	0.0487

## Sheet: S5B.5 lncRNA Bueno gd-othr UP
score.order	lncRNA	biotype	ENSG	cytoband	score	q.value	mean.tgt	mean.other	FC	-1/FC	wilcoxon.p	wilcoxon.p.adj.bh
7	RP11-263K4.5	lincRNA	ENSG00000258170	12q21.31	3.185	0	28.561	3.136	9.108	-0.11	1.08e-10	4.81e-09
16	LINC00689	processed_transcript	ENSG00000231419	7q36.3	2.933	0	4.24	0.794	5.336	-0.187	4.5e-09	9.02e-08
110	RP11-863P13.6	lincRNA	ENSG00000260166	16q24.2	1.957	0	3.932	0.808	4.869	-0.205	5.72e-05	0.000181
44	RP11-74M11.2	lincRNA	ENSG00000248300	4p15.33	2.435	0	1.816	0.426	4.261	-0.235	3.28e-07	3.15e-06
56	RP11-863P13.5	lincRNA	ENSG00000261193	16q24.2	2.337	0	1.854	0.468	3.965	-0.252	2.89e-06	1.68e-05
27	RP11-863P13.4	lincRNA	ENSG00000205037	16q24.2	2.652	0	1.675	0.424	3.954	-0.253	1.14e-07	1.39e-06
31	RP11-71E19.1	lincRNA	ENSG00000250934	3q21.3	2.605	0	1.608	0.438	3.674	-0.272	1.88e-07	2.04e-06
8	RP11-88H9.2	lincRNA	ENSG00000231437	1p13.2	3.134	0	2.275	0.654	3.48	-0.287	3.69e-10	1.23e-08
41	C15orf59-AS1	lincRNA	ENSG00000260469	15q24.1	2.473	0	1.006	0.301	3.339	-0.299	7.38e-07	5.78e-06
112	AC067959.1	lincRNA	ENSG00000233005	2p24.1	1.945	0	5.718	1.914	2.988	-0.335	0.0001	0.000278
9	RP11-494H4.3	lincRNA	ENSG00000270178	3q26.33	3.131	0	1.926	0.681	2.829	-0.353	3.6e-10	1.23e-08
3	EPB41L4A-AS2	lincRNA	ENSG00000278921	5q22.2	3.299	0	2.828	1.027	2.753	-0.363	4.2e-11	3.37e-09
11	LINC00885	lincRNA	ENSG00000224652	3q29	3.053	0	2.733	1.029	2.657	-0.376	1.03e-09	2.95e-08
12	LINC01550	lincRNA	ENSG00000246223	14q32.2	2.995	0	5.997	2.285	2.625	-0.381	2.12e-09	5.31e-08
64	RP11-346C4.3	lincRNA	ENSG00000274718	13q33.3	2.283	0	2.495	0.953	2.619	-0.382	4.99e-06	2.49e-05
32	LINC00473	lincRNA	ENSG00000223414	6q27	2.575	0	6.75	2.757	2.448	-0.408	2.62e-07	2.69e-06
60	RP11-276H19.1	lincRNA	ENSG00000226237	9q21.33	2.314	0	1.574	0.665	2.368	-0.422	3.73e-06	1.99e-05
18	LINC01105	processed_transcript	ENSG00000232044	2p25.2	2.908	0	24.232	10.313	2.35	-0.426	6.06e-09	1.1e-07
14	LINC01186	lincRNA	ENSG00000236751	Xp11.3	2.943	0	1.519	0.66	2.299	-0.435	3.99e-09	8.59e-08
13	CTD-2012K14.6	lincRNA	ENSG00000261386	16q22.1	2.95	0	2.497	1.128	2.214	-0.452	3.69e-09	8.59e-08
4	RP11-79N23.1	lincRNA	ENSG00000227885	6p12.1	3.278	0	3.304	1.534	2.155	-0.464	5.54e-11	3.48e-09
1	AC034220.3	processed_transcript	ENSG00000233006	5q31.1	3.422	0	17.994	8.687	2.071	-0.483	7.82e-12	1.05e-09
69	RP11-379F4.6	lincRNA	ENSG00000272440	3q25.32	2.234	0	3.499	1.695	2.065	-0.484	7.85e-06	3.66e-05
22	RP11-701H24.3	lincRNA	ENSG00000257647	15q11.2	2.782	0	1.149	0.557	2.062	-0.485	2.65e-08	3.94e-07
2	PWAR6	lincRNA	ENSG00000257151	15q11.2	3.356	0	7.712	3.779	2.041	-0.49	1.95e-11	1.95e-09
103	LINC00545	lincRNA	ENSG00000236094	13q12.3	1.996	0	2.946	1.452	2.029	-0.493	6.6e-05	0.000196
71	RP11-379F4.7	lincRNA	ENSG00000272087	3q25.32	2.223	0	20.605	10.316	1.997	-0.501	8.82e-06	3.97e-05
29	TINCR	lincRNA	ENSG00000223573	19p13.3	2.618	0	2.93	1.475	1.986	-0.503	1.66e-07	1.9e-06
36	RP11-102N12.3	lincRNA	ENSG00000273472	4q31.21	2.535	0	2.244	1.131	1.985	-0.504	4e-07	3.56e-06
25	RP11-535A5.1	lincRNA	ENSG00000273348	18q11.2	2.667	0	2.114	1.079	1.959	-0.511	9.63e-08	1.25e-06
97	RP11-359M6.1	lincRNA	ENSG00000257474	12q21.2	2.014	0	22	11.622	1.893	-0.528	5.67e-05	0.00018
5	LINC01515	lincRNA	ENSG00000228065	10q21.3	3.272	0	10.124	5.386	1.88	-0.532	6.08e-11	3.48e-09
62	RP11-2B6.2	lincRNA	ENSG00000269929	9q22.32	2.294	0	4.034	2.153	1.874	-0.534	4.49e-06	2.3e-05
102	LINC01121	processed_transcript	ENSG00000205054	2p21	2	0	1.404	0.753	1.866	-0.536	6.38e-05	0.000191
80	RP11-70D24.3	lincRNA	ENSG00000277214	16q23.2	2.146	0	2.592	1.397	1.856	-0.539	1.79e-05	6.97e-05
164	AC005618.6	lincRNA	ENSG00000272070	5q31.3	1.557	0	1.252	0.677	1.85	-0.54	0.00186	0.00334
81	KLF3-AS1	processed_transcript	ENSG00000231160	4p14	2.111	0	8.138	4.439	1.833	-0.545	2.43e-05	9.19e-05
115	RP11-141M3.6	processed_transcript	ENSG00000273328	3p22.1	1.912	0	1.715	0.937	1.83	-0.546	0.000132	0.000358
57	FENDRR	lincRNA	ENSG00000268388	16q24.1	2.336	0	10.056	5.51	1.825	-0.548	3.01e-06	1.72e-05
55	RP1-78O14.1	lincRNA	ENSG00000257894	12q21.2	2.341	0	17.546	9.75	1.8	-0.556	2.85e-06	1.68e-05
188	AP000688.29	lincRNA	ENSG00000233393	21q22.12	1.378	0.055	1.526	0.855	1.785	-0.56	0.00583	0.00874
17	GLIDR	lincRNA	ENSG00000278175	9p12	2.914	0	1.312	0.743	1.765	-0.567	5.67e-09	1.08e-07
21	CH17-360D5.2	lincRNA	ENSG00000276850	10q11.22	2.783	0	38.685	21.94	1.763	-0.567	2.63e-08	3.94e-07
116	RP11-15H20.6	processed_transcript	ENSG00000213971	19p12	1.906	0	12.577	7.139	1.762	-0.568	0.000138	0.000371
40	RP11-701H24.4	lincRNA	ENSG00000261069	15q11.2	2.475	0	1.557	0.89	1.75	-0.571	7.5e-07	5.78e-06
175	RP11-384O8.1	lincRNA	ENSG00000267034	2q36.1	1.506	0	2.366	1.37	1.727	-0.579	0.00261	0.00436
51	LINC01018	lincRNA	ENSG00000250056	5p15.31	2.377	0	10.618	6.157	1.725	-0.58	2.01e-06	1.28e-05
76	CTD-2600O9.1	lincRNA	ENSG00000187185	16q21	2.179	0	3.722	2.162	1.722	-0.581	1.32e-05	5.46e-05
176	RP11-844P9.2	lincRNA	ENSG00000248596	5q35.2	1.5	0	2.337	1.363	1.715	-0.583	0.00271	0.00451
107	AC017104.6	processed_transcript	ENSG00000224376	2q37.1	1.978	0	8.267	4.858	1.702	-0.588	7.68e-05	0.00022
15	RP11-1109F11.3	lincRNA	ENSG00000271327	12q21.33	2.941	0	2.118	1.247	1.698	-0.589	4.07e-09	8.59e-08
78	RP11-823E8.3	lincRNA	ENSG00000274021	12q21.33	2.154	0	2.349	1.39	1.69	-0.592	1.66e-05	6.59e-05
20	RP11-736K20.6	lincRNA	ENSG00000246523	11q14.2	2.793	0	1.455	0.871	1.67	-0.599	2.35e-08	3.77e-07
30	AC124789.1	processed_transcript	ENSG00000276170	17q12	2.615	0	29.819	17.864	1.669	-0.599	1.71e-07	1.9e-06
98	RP11-77P16.4	lincRNA	ENSG00000249846	3q22.1	2.004	0	1.509	0.908	1.663	-0.601	6.16e-05	0.000189
19	SNHG14	processed_transcript	ENSG00000224078	15q11.2	2.855	0	33.078	20.09	1.647	-0.607	1.14e-08	1.9e-07
155	AC008088.4	lincRNA	ENSG00000260907	17p11.2	1.617	0	1.686	1.03	1.637	-0.611	0.00122	0.00234
95	CH17-360D5.3	lincRNA	ENSG00000273760	10q11.22	2.019	0	9.704	5.967	1.626	-0.615	5.41e-05	0.000175
185	RP11-168F9.2	lincRNA	ENSG00000272088	1p36.32	1.394	0	1.192	0.747	1.597	-0.626	0.00533	0.00819
85	RP11-19E11.1	lincRNA	ENSG00000258910	2q14.2	2.104	0	3.413	2.144	1.592	-0.628	2.58e-05	9.41e-05
135	LINC00571	lincRNA	ENSG00000223685	13q13.3	1.769	0	1.011	0.635	1.591	-0.629	0.000406	0.000947
121	RP11-424G14.1	lincRNA	ENSG00000260197	Yq11.223	1.863	0	2.281	1.448	1.575	-0.635	0.00019	0.000492
10	OIP5-AS1	processed_transcript	ENSG00000247556	15q15.1	3.06	0	50.795	32.276	1.574	-0.635	9.48e-10	2.92e-08
23	IQCH-AS1	lincRNA	ENSG00000259673	15q23	2.71	0	3.8	2.414	1.574	-0.635	6e-08	8.59e-07
46	OXCT1-AS1	processed_transcript	ENSG00000248668	5p13.1	2.427	0	1.283	0.821	1.563	-0.64	1.22e-06	8.74e-06
172	CTB-75G16.3	lincRNA	ENSG00000275720	17q12	1.515	0	1.135	0.729	1.557	-0.642	0.00245	0.00415
59	RP11-554I8.2	lincRNA	ENSG00000223784	10p14	2.315	0	2.426	1.566	1.549	-0.645	3.65e-06	1.98e-05
63	RP11-434E6.4	lincRNA	ENSG00000277559	16q12.2	2.294	0	2.018	1.304	1.548	-0.646	4.49e-06	2.3e-05
166	MIR4458HG	lincRNA	ENSG00000247516	5p15.31	1.543	0	8.681	5.651	1.536	-0.651	0.00204	0.00364
38	RP11-474O21.5	lincRNA	ENSG00000272482	1p36.21	2.519	0	4.916	3.211	1.531	-0.653	4.75e-07	4.05e-06
101	RP11-295H24.4	lincRNA	ENSG00000275580	15q21.2	2	0	3.85	2.518	1.529	-0.654	6.38e-05	0.000191
82	LINC01126	lincRNA	ENSG00000279873	2p21	2.11	0	1.271	0.837	1.518	-0.659	2.46e-05	9.22e-05
42	DNAJC3-AS1	lincRNA	ENSG00000247400	13q32.1	2.451	0	2.047	1.353	1.513	-0.661	9.52e-07	7.2e-06
83	RP11-441O15.3	lincRNA	ENSG00000224934	10q24.2	2.109	0	1.657	1.099	1.508	-0.663	2.49e-05	9.25e-05
124	RP11-353N14.4	lincRNA	ENSG00000262188	17q25.3	1.846	0	1.234	0.819	1.506	-0.664	0.000224	0.000565
65	LINC01239	lincRNA	ENSG00000234840	9p21.3	2.282	0	1.06	0.706	1.502	-0.666	5.02e-06	2.49e-05
48	RP3-329A5.8	lincRNA	ENSG00000272374	6p21.31	2.396	0	1.146	0.764	1.501	-0.666	1.66e-06	1.13e-05
123	RP11-736N17.10	lincRNA	ENSG00000278071	14q32.32	1.854	0	8.945	5.959	1.501	-0.666	0.00021	0.000536
119	RP11-128A17.2	lincRNA	ENSG00000274444	15q14	1.872	0	3.11	2.074	1.5	-0.667	0.000182	0.000477
132	TTTY15	lincRNA	ENSG00000233864	Yq11.221	1.793	0	4.533	3.03	1.496	-0.668	0.000334	0.000793
105	RP11-262H14.4	lincRNA	ENSG00000170161	9q13	1.983	0	1.862	1.25	1.49	-0.671	7.33e-05	0.000213
111	LINC00886	lincRNA	ENSG00000240875	3q25.31	1.948	0	1.467	0.984	1.49	-0.671	9.87e-05	0.000277
75	RP11-18H7.1	lincRNA	ENSG00000242622	3q13.33	2.186	0	2.466	1.656	1.489	-0.672	1.24e-05	5.18e-05
163	PACERR	lincRNA	ENSG00000273129	1q31.1	1.564	0	1.377	0.927	1.485	-0.673	0.00177	0.00323
144	RP11-216L13.19	processed_transcript	ENSG00000273066	9q34.3	1.694	0	4.006	2.701	1.483	-0.674	0.000706	0.00149
58	AJ011932.1	lincRNA	ENSG00000274248	21q22.3	2.33	0	1.671	1.135	1.473	-0.679	3.18e-06	1.77e-05
114	RP11-359J14.2	lincRNA	ENSG00000256973	12p12.1	1.92	0	1.402	0.952	1.472	-0.679	0.000124	0.000341
88	CTD-3157E16.1	lincRNA	ENSG00000265519	17p12	2.084	0	6.699	4.57	1.466	-0.682	3.1e-05	0.000109
74	RP11-1007O24.2	lincRNA	ENSG00000261187	15q24.1	2.194	0	1.327	0.905	1.465	-0.682	1.15e-05	4.96e-05
151	CTD-2245F17.3	lincRNA	ENSG00000269051	19q13.42	1.645	0	3.014	2.061	1.462	-0.684	0.00101	0.00198
118	LINC00240	lincRNA	ENSG00000224843	6p22.2	1.887	0	3.155	2.161	1.46	-0.685	0.000162	0.000427
160	LINC01139	lincRNA	ENSG00000215808	1q43	1.581	0	17.4	11.952	1.456	-0.687	0.00157	0.00291
167	RP11-1000B6.3	lincRNA	ENSG00000261064	15q13.3	1.54	0	1.454	1	1.454	-0.688	0.00208	0.00369
47	RP11-166O4.6	lincRNA	ENSG00000273448	7q11.21	2.41	0	2.203	1.516	1.453	-0.688	1.45e-06	1e-05
181	CTC-573N18.1	lincRNA	ENSG00000250509	5q35.3	1.464	0	2.915	2.007	1.453	-0.688	0.00342	0.00549
117	RP11-1109F11.5	lincRNA	ENSG00000271259	12q21.33	1.888	0	1.556	1.075	1.448	-0.691	0.00016	0.000425
154	RP11-434B12.1	lincRNA	ENSG00000260837	2p25.1	1.62	0	2.181	1.506	1.448	-0.69	0.0012	0.00231
159	RFX3-AS1	lincRNA	ENSG00000232104	9p24.2	1.583	0	1.456	1.011	1.44	-0.694	0.00155	0.00289
34	USP46-AS1	lincRNA	ENSG00000248866	4q12	2.553	0	2.372	1.648	1.439	-0.695	3.31e-07	3.15e-06
90	LAMTOR5-AS1	processed_transcript	ENSG00000224699	1p13.3	2.051	0	2.856	1.988	1.437	-0.696	4.13e-05	0.00014
35	RP11-517P14.2	lincRNA	ENSG00000230555	10q11.21	2.549	0	2.046	1.426	1.435	-0.697	3.46e-07	3.15e-06
136	RP11-420N3.3	processed_transcript	ENSG00000279877	16p13.3	1.753	0	1.055	0.736	1.434	-0.697	0.000457	0.00105
28	CTC-559E9.1	lincRNA	ENSG00000266904	19p13.11	2.634	0	5.564	3.892	1.43	-0.699	1.38e-07	1.63e-06
122	SMC2-AS1	lincRNA	ENSG00000270332	9q31.1	1.854	0	1.275	0.892	1.43	-0.699	0.00021	0.000536
33	RP11-1007O24.3	lincRNA	ENSG00000261423	15q24.1	2.57	0	1.462	1.024	1.428	-0.7	2.78e-07	2.79e-06
52	ATP1A1-AS1	processed_transcript	ENSG00000203865	1p13.1	2.371	0	2.569	1.798	1.428	-0.7	2.12e-06	1.33e-05
156	RP11-297J22.1	lincRNA	ENSG00000271709	2q14.2	1.612	0	7.38	5.191	1.422	-0.703	0.00127	0.00243
157	RP11-499E18.1	lincRNA	ENSG00000248161	4q24	1.608	0	4.523	3.181	1.422	-0.703	0.00131	0.00249
179	RP11-123O10.4	lincRNA	ENSG00000256248	12q14.3	1.47	0	2.385	1.68	1.419	-0.705	0.00328	0.0053
184	MEG8	lincRNA	ENSG00000258399	14q32.2	1.444	0	2.321	1.637	1.418	-0.705	0.0039	0.00613
138	MEG3	lincRNA	ENSG00000214548	14q32.2	1.748	0	193.208	136.316	1.417	-0.706	0.000475	0.00106
192	HCG11	lincRNA	ENSG00000228223	6p22.2	1.279	0.055	4.295	3.034	1.416	-0.706	0.0106	0.0148
72	LINC01355	lincRNA	ENSG00000261326	1p36.12	2.217	0	7.947	5.621	1.414	-0.707	9.28e-06	4.13e-05
6	RP4-769N13.6	processed_transcript	ENSG00000271147	Xq22.1	3.251	0	7.642	5.407	1.413	-0.707	8e-11	4.01e-09
180	CTD-2561J22.5	processed_transcript	ENSG00000268119	19p12	1.466	0	3.533	2.523	1.4	-0.714	0.00339	0.00546
139	RP11-435O5.2	lincRNA	ENSG00000237857	9q22.32	1.748	0	1.03	0.736	1.399	-0.715	0.000475	0.00106
93	C21orf62-AS1	lincRNA	ENSG00000205930	21q22.11	2.032	0	1.083	0.775	1.397	-0.716	4.87e-05	0.000161
137	RP11-29B2.6	lincRNA	ENSG00000276957	13q33.1	1.749	0	1.177	0.843	1.396	-0.716	0.00047	0.00106
191	CH17-437K3.1	lincRNA	ENSG00000227082	1p11.2	1.332	0.055	1.226	0.878	1.396	-0.716	0.00774	0.0112
108	U91328.19	lincRNA	ENSG00000272462	6p22.2	1.97	0	1.107	0.793	1.395	-0.717	8.22e-05	0.000234
158	RP11-626G11.6	lincRNA	ENSG00000278389	16p12.3	1.601	0	1.639	1.183	1.386	-0.722	0.00137	0.00258
171	CTD-2033C11.1	lincRNA	ENSG00000269961	5q12.3	1.518	0	1.13	0.817	1.382	-0.724	0.00241	0.00409
37	EIF3J-AS1	lincRNA	ENSG00000179523	15q21.1	2.526	0	6.293	4.556	1.381	-0.724	4.42e-07	3.85e-06
94	RP11-347I19.7	lincRNA	ENSG00000274292	12q24.31	2.026	0	2.601	1.884	1.381	-0.724	5.11e-05	0.000167
24	RP11-352M15.2	lincRNA	ENSG00000273015	12q12	2.674	0	4.072	2.95	1.38	-0.725	8.93e-08	1.23e-06
70	RP11-793H13.8	processed_transcript	ENSG00000257379	12q13.13	2.227	0	2.431	1.762	1.38	-0.725	8.49e-06	3.87e-05
169	RP11-2C24.4	processed_transcript	ENSG00000260899	16p11.2	1.524	0	1.417	1.03	1.376	-0.727	0.00232	0.00399
53	RAD51-AS1	processed_transcript	ENSG00000245849	15q15.1	2.36	0	9.852	7.165	1.375	-0.727	2.36e-06	1.45e-05
67	LINC01560	lincRNA	ENSG00000196741	Xp11.3	2.264	0	4.116	2.993	1.375	-0.727	5.99e-06	2.86e-05
86	RPARP-AS1	processed_transcript	ENSG00000269609	10q24.32	2.096	0	12.609	9.169	1.375	-0.727	2.78e-05	0.0001
50	LINC00863	lincRNA	ENSG00000224914	10q23.2	2.381	0	1.528	1.12	1.364	-0.733	1.93e-06	1.27e-05
140	RP11-398C13.6	lincRNA	ENSG00000272853	10p13	1.745	0	2.014	1.477	1.364	-0.733	0.000485	0.00108
194	RP11-171I2.4	lincRNA	ENSG00000271141	2q31.2	1.275	0.055	2.571	1.885	1.364	-0.733	0.0108	0.015
153	RP11-438L19.1	lincRNA	ENSG00000272800	2q32.1	1.634	0	1.088	0.8	1.36	-0.735	0.00109	0.00211
183	RP11-389O22.1	lincRNA	ENSG00000236066	1p13.2	1.447	0	1.359	1	1.359	-0.736	0.00381	0.00602
26	EBLN3	lincRNA	ENSG00000281649	9p13.2	2.661	0	39.564	29.155	1.357	-0.737	1.04e-07	1.3e-06
149	C1orf132	lincRNA	ENSG00000203709	1q32.2	1.67	0	1.222	0.901	1.357	-0.737	0.000845	0.0017
146	OSMR-AS1	lincRNA	ENSG00000249740	5p13.1	1.679	0	2.028	1.496	1.356	-0.737	0.000788	0.00163
96	RP11-1017G21.5	lincRNA	ENSG00000271780	14q32.31	2.015	0	1.605	1.192	1.346	-0.743	5.61e-05	0.00018
143	SPTY2D1-AS1	processed_transcript	ENSG00000247595	11p15.1	1.704	0	1.6	1.192	1.342	-0.745	0.000658	0.00142
168	RP11-473M20.16	lincRNA	ENSG00000261889	16p13.3	1.533	0	1.05	0.784	1.34	-0.746	0.00218	0.00382
127	AC009120.5	lincRNA	ENSG00000260884	16q23.1	1.817	0	3.387	2.536	1.336	-0.749	0.000281	0.000696
128	AC007405.6	lincRNA	ENSG00000239467	2q31.1	1.809	0	2.522	1.888	1.336	-0.749	0.0003	0.000738
161	RP11-662M24.2	lincRNA	ENSG00000256725	12q24.33	1.577	0	2.593	1.943	1.335	-0.749	0.0016	0.00296
109	RP1-283E3.8	processed_transcript	ENSG00000268575	1p36.33	1.96	0	1.798	1.348	1.334	-0.75	8.91e-05	0.000252
195	CTD-2095E4.5	lincRNA	ENSG00000277511	17q11.2	1.255	0.055	2.97	2.23	1.332	-0.751	0.0121	0.0167
104	RP4-625H18.2	lincRNA	ENSG00000228412	6p22.3	1.994	0	2.247	1.692	1.328	-0.753	6.68e-05	0.000196
125	RP11-10C24.3	lincRNA	ENSG00000271643	3p22.3	1.846	0	2.399	1.807	1.328	-0.753	0.000224	0.000565
43	AC093627.9	lincRNA	ENSG00000242474	7p22.3	2.44	0	1.458	1.1	1.326	-0.754	1.07e-06	7.95e-06
66	XXbac-BPGBPG55C20.2	lincRNA	ENSG00000272316	6p11.2	2.279	0	1.488	1.122	1.326	-0.754	5.19e-06	2.51e-05
91	RP11-480A16.1	lincRNA	ENSG00000260261	3q29	2.045	0	2.02	1.523	1.326	-0.754	4.33e-05	0.000146
45	RP11-468E2.10	lincRNA	ENSG00000276698	14q12	2.427	0	2.809	2.123	1.323	-0.756	1.22e-06	8.74e-06
129	COX10-AS1	processed_transcript	ENSG00000236088	17p12	1.806	0	9.765	7.4	1.32	-0.758	0.000306	0.000739
150	ABC12-49244600F4.4	lincRNA	ENSG00000276144	12p13.31	1.654	0	1.165	0.882	1.32	-0.757	0.000942	0.00186
189	RP1-292L20.3	lincRNA	ENSG00000274818	14q24.2	1.376	0.055	1.218	0.924	1.318	-0.759	0.00594	0.00885
54	LINC00909	lincRNA	ENSG00000264247	18q22.3	2.359	0	6.857	5.208	1.317	-0.759	2.4e-06	1.45e-05
197	CTC-523E23.11	lincRNA	ENSG00000271109	19q13.11	1.137	0.194	1.043	0.792	1.316	-0.76	0.0231	0.0302
92	AC007405.4	lincRNA	ENSG00000234350	2q31.1	2.036	0	1.167	0.89	1.311	-0.763	4.7e-05	0.000157
68	RP11-486O12.2	lincRNA	ENSG00000247373	12q24.31	2.242	0	1.079	0.824	1.309	-0.764	7.37e-06	3.48e-05
39	RP11-448A19.1	lincRNA	ENSG00000273329	7q32.2	2.498	0	1.198	0.916	1.308	-0.765	5.89e-07	4.82e-06
77	RP11-403I13.8	processed_transcript	ENSG00000272419	1q21.1	2.16	0	4.047	3.096	1.307	-0.765	1.58e-05	6.34e-05
173	MIR22HG	lincRNA	ENSG00000186594	17p13.3	1.514	0	28.941	22.158	1.306	-0.766	0.00247	0.00416
190	LINC00707	lincRNA	ENSG00000238266	10p14	1.361	0.055	1.081	0.828	1.306	-0.766	0.00651	0.00963
79	AC007383.3	lincRNA	ENSG00000227946	2q33.3	2.151	0	7.456	5.713	1.305	-0.766	1.7e-05	6.68e-05
49	GMDS-AS1	lincRNA	ENSG00000250903	6p25.3	2.385	0	7.363	5.654	1.302	-0.768	1.85e-06	1.24e-05
148	NDUFA6-AS1	processed_transcript	ENSG00000237037	22q13.2	1.672	0	2.274	1.747	1.302	-0.768	0.000828	0.00168
174	CTD-2227E11.1	lincRNA	ENSG00000270933	7p15.2	1.507	0	6.793	5.216	1.302	-0.768	0.00259	0.00435
182	CTB-96E2.3	processed_transcript	ENSG00000258924	17q11.2	1.455	0	1.946	1.495	1.302	-0.768	0.00363	0.00578
187	RP5-998N21.10	processed_transcript	ENSG00000273213	1q21.1	1.379	0.055	1.651	1.269	1.302	-0.768	0.00584	0.00874
177	LRRC75A-AS1	processed_transcript	ENSG00000175061	17p11.2	1.485	0	625.995	481.118	1.301	-0.769	0.00299	0.00493
106	LINC00665	lincRNA	ENSG00000232677	19q13.12	1.979	0	18.379	14.155	1.298	-0.77	7.59e-05	0.000219
134	WDFY3-AS2	processed_transcript	ENSG00000180769	4q21.23	1.77	0	1.449	1.117	1.297	-0.771	0.000402	0.000943
193	XXbac-B461K10.4	processed_transcript	ENSG00000093100	22q11.21	1.279	0.055	5.293	4.085	1.296	-0.772	0.0106	0.0148
87	RP11-121C2.2	lincRNA	ENSG00000259959	4p12	2.095	0	1.212	0.938	1.292	-0.774	2.81e-05	0.000101
162	LINC01341	processed_transcript	ENSG00000227953	1q44	1.57	0	2.797	2.17	1.289	-0.776	0.00169	0.00309
198	RP11-496H1.2	lincRNA	ENSG00000273308	3q29	1.115	0.194	1.145	0.889	1.289	-0.776	0.0259	0.0336
84	AP001258.4	lincRNA	ENSG00000245571	11q12.1	2.104	0	5.548	4.306	1.288	-0.776	2.58e-05	9.41e-05
142	RP13-216E22.4	lincRNA	ENSG00000228906	Xq13.2	1.718	0	1.069	0.831	1.286	-0.778	0.000595	0.00129
73	LL0XNC01-7P3.1	lincRNA	ENSG00000270012	Xp11.23	2.204	0	2.33	1.813	1.285	-0.778	1.05e-05	4.63e-05
99	CTD-3157E16.2	lincRNA	ENSG00000276855	17p12	2.004	0	12.382	9.632	1.285	-0.778	6.16e-05	0.000189
100	GS1-124K5.3	lincRNA	ENSG00000223473	7q11.21	2.003	0	1.922	1.499	1.282	-0.78	6.23e-05	0.000189
152	RP11-394I13.2	lincRNA	ENSG00000271151	2q31.1	1.636	0	1.288	1.004	1.282	-0.78	0.00107	0.00208
133	LINC00921	lincRNA	ENSG00000281005	16p13.3	1.77	0	1.541	1.203	1.281	-0.781	0.000402	0.000943
170	RP11-17E13.2	lincRNA	ENSG00000272864	1p31.1	1.522	0	1.123	0.879	1.278	-0.783	0.00234	0.00399
61	RP11-890B15.3	lincRNA	ENSG00000255455	11q24.3	2.303	0	4.793	3.767	1.272	-0.786	4.15e-06	2.19e-05
196	RP11-526I2.5	lincRNA	ENSG00000270127	15q26.3	1.228	0.108	1.68	1.321	1.272	-0.786	0.0141	0.0193
131	RP11-638I2.6	lincRNA	ENSG00000258504	14q32.2	1.795	0	6.719	5.288	1.271	-0.787	0.000333	0.000793
145	CTC-241N9.1	lincRNA	ENSG00000245317	5q35.3	1.683	0	2.376	1.87	1.271	-0.787	0.000765	0.0016
113	LINC00174	lincRNA	ENSG00000179406	7q11.21	1.932	0	4.726	3.731	1.267	-0.79	0.000112	0.00031
130	RP11-164J13.1	processed_transcript	ENSG00000258461	15q15.1	1.806	0	2.373	1.876	1.265	-0.791	0.000306	0.000739
147	RP11-188D8.1	lincRNA	ENSG00000271427	1p12	1.675	0	1.188	0.944	1.258	-0.795	0.000812	0.00166
126	RP11-817O13.8	lincRNA	ENSG00000260274	15q24.2	1.836	0	1.675	1.332	1.257	-0.795	0.000242	0.000603
178	RP11-112J3.16	lincRNA	ENSG00000227388	9p13.3	1.477	0	2.938	2.341	1.255	-0.797	0.00315	0.00516
89	CTD-2017D11.1	lincRNA	ENSG00000268362	19p12	2.052	0	1.562	1.245	1.254	-0.798	4.08e-05	0.00014
141	LINC01089	lincRNA	ENSG00000212694	12q24.31	1.736	0	21.29	16.972	1.254	-0.797	0.000521	0.00115
186	RP11-10C24.1	lincRNA	ENSG00000271020	3p22.3	1.39	0	2.522	2.016	1.251	-0.799	0.00545	0.00834
199	RP11-440D17.4	lincRNA	ENSG00000273305	2q11.1	1.094	0.194	1.848	1.478	1.251	-0.799	0.0287	0.0371
120	CTD-2528L19.6	lincRNA	ENSG00000267152	19q13.12	1.868	0	3.147	2.516	1.25	-0.8	0.000188	0.00049
165	LINC00857	lincRNA	ENSG00000237523	10q22.3	1.543	0	3.032	2.425	1.25	-0.8	0.00204	0.00364

## Sheet: S5B.6 lncRNA Bueno gd-othr DN
score.order	lncRNA	biotype	ENSG	cytoband	score	q.value	mean.tgt	mean.other	FC	-1/FC	wilcoxon.p	wilcoxon.p.adj.bh
10	RP11-865I6.2	lincRNA	ENSG00000254337	8q13.2	-2.44	0	0.083	6.137	0.014	-73.846	5.23e-07	4.37e-06
7	GS1-600G8.5	lincRNA	ENSG00000235385	Xp22.2	-2.59	0	0.283	14.44	0.02	-50.954	2.22e-07	2.34e-06
1	RP11-417E7.1	lincRNA	ENSG00000223485	6q27	-3.579	0	0.853	16.897	0.05	-19.816	8.24e-13	2.93e-10
54	DISC1FP1	processed_transcript	ENSG00000261645	11q14.3	-1.649	0.198	0.297	5.074	0.059	-17.066	0.000921	0.00184
5	RP11-54H7.4	lincRNA	ENSG00000275216	13q33.3	-2.894	0	0.738	5.876	0.126	-7.962	7.13e-09	1.24e-07
3	SFTA1P	lincRNA	ENSG00000225383	10p14	-3.159	0	1.93	13.8	0.14	-7.149	2.68e-10	1.07e-08
23	RP11-481J13.1	lincRNA	ENSG00000272180	2p16.1	-2.171	0	0.193	1.193	0.162	-6.175	1.42e-05	5.75e-05
144	RP11-362F19.1	lincRNA	ENSG00000248810	4q31.21	-0.67	1.276	1.75	10.364	0.169	-5.922	0.181	0.205
134	RMRP	lincRNA	ENSG00000269900	9p13.3	-0.769	1.045	7.656	42.746	0.179	-5.583	0.124	0.146
15	RP11-400N13.3	lincRNA	ENSG00000232679	1q41	-2.318	0	0.238	1.077	0.222	-4.514	3.28e-06	1.8e-05
69	APCDD1L-AS1	processed_transcript	ENSG00000231290	20q13.32	-1.473	0.23	0.433	1.819	0.238	-4.197	0.00324	0.00526
39	C6orf99	lincRNA	ENSG00000203711	6q25.3	-1.751	0.108	0.598	2.459	0.243	-4.113	0.000465	0.00106
6	LINC00941	lincRNA	ENSG00000235884	12p11.21	-2.672	0	0.38	1.488	0.255	-3.917	9.21e-08	1.23e-06
40	FLJ22447	lincRNA	ENSG00000232774	14q23.1	-1.751	0.108	0.426	1.614	0.264	-3.786	0.000465	0.00106
138	XIST	lincRNA	ENSG00000229807	Xq13.2	-0.727	1.276	7.828	29.477	0.266	-3.766	0.146	0.17
16	AC006262.5	lincRNA	ENSG00000268621	19q13.32	-2.283	0	0.638	2.341	0.272	-3.671	4.54e-06	2.3e-05
159	AL035610.1	processed_transcript	ENSG00000232079	21q21.3	-0.369	3.438	0.452	1.636	0.276	-3.622	0.461	0.493
22	RP11-1008C21.1	lincRNA	ENSG00000259225	15q14	-2.177	0	0.348	1.224	0.284	-3.517	1.34e-05	5.48e-05
150	RNU11	lincRNA	ENSG00000270103	1p35.3	-0.491	2.458	0.803	2.774	0.29	-3.453	0.201	0.226
132	LINC00479	lincRNA	ENSG00000236384	21q22.3	-0.79	1.045	0.347	1.126	0.308	-3.247	0.114	0.135
58	LINC01234	lincRNA	ENSG00000249550	12q24.13	-1.562	0.198	0.451	1.457	0.309	-3.233	0.00179	0.00325
38	DKFZp434J0226	processed_transcript	ENSG00000268460	19q13.32	-1.762	0.108	0.484	1.558	0.311	-3.215	0.000428	0.000992
4	AC133644.2	lincRNA	ENSG00000280721	2p11.2	-3.036	0	0.949	2.954	0.321	-3.113	1.27e-09	3.4e-08
33	H19	processed_transcript	ENSG00000130600	11p15.5	-1.915	0.108	223.846	685.299	0.327	-3.061	0.000129	0.000352
70	FOXD1-AS1	lincRNA	ENSG00000247993	5q13.2	-1.457	0.23	0.621	1.778	0.349	-2.864	0.00359	0.00574
34	AC112721.2	lincRNA	ENSG00000222032	2q37.3	-1.892	0.108	0.481	1.267	0.379	-2.635	0.000151	0.000404
50	CTD-2545M3.8	lincRNA	ENSG00000268518	19q13.33	-1.674	0.198	0.466	1.196	0.39	-2.565	0.00082	0.00167
30	RP11-417E7.2	lincRNA	ENSG00000261039	6q27	-2.012	0.056	0.422	1.054	0.4	-2.501	5.77e-05	0.000181
18	MIR155HG	lincRNA	ENSG00000234883	21q21.3	-2.23	0	1.735	4.251	0.408	-2.451	8.27e-06	3.81e-05
52	LINC00944	lincRNA	ENSG00000256128	12q24.32	-1.656	0.198	0.446	1.068	0.418	-2.391	0.00093	0.00185
160	RP4-555D20.2	lincRNA	ENSG00000261786	3p21.32	-0.348	3.438	0.425	1.005	0.423	-2.364	0.487	0.519
57	LINC01436	lincRNA	ENSG00000231106	21q22.12	-1.572	0.198	2.525	5.907	0.427	-2.339	0.00168	0.00309
122	RP5-875H18.9	lincRNA	ENSG00000276851	17q21.33	-0.932	0.658	0.542	1.267	0.427	-2.339	0.0625	0.077
72	RP11-482H16.1	processed_transcript	ENSG00000271894	2p16.1	-1.434	0.23	1.077	2.51	0.429	-2.331	0.00414	0.00648
21	EML2-AS1	processed_transcript	ENSG00000267757	19q13.32	-2.188	0	0.48	1.091	0.44	-2.275	1.21e-05	5.11e-05
46	PCAT19	lincRNA	ENSG00000267107	19q13.2	-1.696	0.198	0.584	1.316	0.443	-2.255	0.000699	0.00148
102	RP11-81H14.2	lincRNA	ENSG00000251301	12q15	-1.205	0.287	0.708	1.591	0.445	-2.248	0.016	0.0215
36	DUXAP8	processed_transcript	ENSG00000206195	22q11.1	-1.806	0.108	1.102	2.47	0.446	-2.241	0.000306	0.000739
85	LINC01605	lincRNA	ENSG00000253161	8p11.23	-1.343	0.254	0.665	1.463	0.455	-2.2	0.00725	0.0106
113	AC092580.4	lincRNA	ENSG00000235576	2p25.1	-1.091	0.362	2.093	4.468	0.468	-2.135	0.0292	0.0375
9	RP11-14N7.2	lincRNA	ENSG00000232527	1q21.1	-2.486	0	8.464	17.88	0.473	-2.113	6.69e-07	5.37e-06
66	RP5-1028K7.2	lincRNA	ENSG00000266088	17q21.2	-1.491	0.23	0.576	1.2	0.48	-2.084	0.00288	0.00477
8	RP4-621F18.2	lincRNA	ENSG00000282057	1p22.3	-2.55	0	0.506	1.04	0.486	-2.056	3.41e-07	3.15e-06
156	RP11-536O18.1	lincRNA	ENSG00000226197	9p23	-0.422	2.915	0.594	1.219	0.487	-2.052	0.4	0.435
32	AC093850.2	lincRNA	ENSG00000230838	2q35	-1.994	0.056	4.152	8.464	0.491	-2.039	6.68e-05	0.000196
25	GAPLINC	lincRNA	ENSG00000266835	18p11.31	-2.136	0	0.98	1.992	0.492	-2.033	1.95e-05	7.45e-05
45	LINC00702	lincRNA	ENSG00000233117	10p15.1	-1.703	0.198	0.757	1.495	0.506	-1.976	0.000665	0.00142
35	RP11-893F2.6	lincRNA	ENSG00000251085	17q21.33	-1.843	0.108	1.226	2.415	0.508	-1.969	0.000229	0.000574
2	CTB-193M12.5	lincRNA	ENSG00000280206	16p13.11	-3.54	0	2.773	5.434	0.51	-1.959	1.46e-12	2.93e-10
44	RP11-161I6.2	lincRNA	ENSG00000263745	18p11.32	-1.703	0.198	1.252	2.359	0.531	-1.884	0.000661	0.00142
43	AC005083.1	processed_transcript	ENSG00000233834	7p21.1	-1.718	0.198	0.565	1.062	0.532	-1.88	0.000595	0.00129
24	AC012146.7	processed_transcript	ENSG00000234327	17p13.2	-2.137	0	2.402	4.511	0.533	-1.878	1.92e-05	7.4e-05
29	MIR222HG	lincRNA	ENSG00000270069	Xp11.3	-2.03	0.056	4.489	8.351	0.537	-1.86	4.93e-05	0.000162
27	LINC00152	lincRNA	ENSG00000222041	2p11.2	-2.065	0.056	39.379	72.831	0.541	-1.849	3.66e-05	0.000128
103	ZFPM2-AS1	processed_transcript	ENSG00000251003	8q23.1	-1.197	0.287	1.933	3.547	0.545	-1.836	0.0167	0.0224
162	RP11-863P13.3	lincRNA	ENSG00000261327	16q24.2	-0.275	4.185	1.201	2.179	0.551	-1.814	0.583	0.617
131	AC079767.4	lincRNA	ENSG00000224137	2q33.3	-0.802	1.045	0.79	1.399	0.564	-1.772	0.109	0.13
73	PAX8-AS1	processed_transcript	ENSG00000189223	2q14.1	-1.411	0.23	18.727	33.116	0.565	-1.768	0.0048	0.00749
111	AC007879.7	lincRNA	ENSG00000229647	2q33.3	-1.12	0.362	0.776	1.361	0.57	-1.753	0.0251	0.0327
127	CTC-231O11.1	lincRNA	ENSG00000253522	5q33.3	-0.864	0.765	0.764	1.335	0.572	-1.748	0.0841	0.101
163	WFDC21P	processed_transcript	ENSG00000261040	17q23.1	-0.268	4.185	7.368	12.868	0.573	-1.746	0.592	0.621
55	ZNF883	lincRNA	ENSG00000228623	9q32	-1.601	0.198	1.322	2.264	0.584	-1.713	0.00137	0.00258
86	RP3-522D1.1	lincRNA	ENSG00000224167	1p13.2	-1.338	0.254	0.615	1.049	0.586	-1.705	0.00749	0.0108
106	LINC01272	lincRNA	ENSG00000224397	20q13.13	-1.169	0.287	2.798	4.748	0.589	-1.697	0.0195	0.0257
20	AC156455.1	processed_transcript	ENSG00000256546	12q24.31	-2.19	0	1.867	3.155	0.592	-1.69	1.2e-05	5.11e-05
11	CMB9-22P13.1	lincRNA	ENSG00000173727	11q13.1	-2.424	0	1.417	2.394	0.592	-1.689	1.26e-06	8.86e-06
74	RP11-395G23.3	lincRNA	ENSG00000254615	8q23.1	-1.405	0.23	0.836	1.402	0.596	-1.677	0.00497	0.00772
141	RP11-212I21.2	lincRNA	ENSG00000260135	16q12.2	-0.706	1.276	1.502	2.515	0.597	-1.675	0.158	0.182
60	RP11-65J21.3	lincRNA	ENSG00000262454	16p13.12	-1.536	0.198	1.472	2.452	0.6	-1.666	0.00214	0.00378
161	RP11-291B21.2	lincRNA	ENSG00000256039	12p13.2	-0.33	3.637	0.717	1.195	0.6	-1.666	0.511	0.544
129	MIAT	lincRNA	ENSG00000225783	22q12.1	-0.808	1.045	2.919	4.856	0.601	-1.664	0.106	0.127
142	RP13-297E16.4	lincRNA	ENSG00000223511	Xp22.33	-0.703	1.276	0.976	1.624	0.601	-1.664	0.16	0.183
101	RP11-473M20.9	lincRNA	ENSG00000262370	16p13.3	-1.213	0.287	1.423	2.354	0.604	-1.654	0.0154	0.0208
80	CTB-61M7.2	lincRNA	ENSG00000268734	19q13.42	-1.38	0.23	0.924	1.519	0.609	-1.643	0.00579	0.00873
19	MIR4435-2HG	lincRNA	ENSG00000172965	2q13	-2.198	0	36.954	60.654	0.609	-1.641	1.11e-05	4.84e-05
158	AC058791.1	lincRNA	ENSG00000226380	7q32.3	-0.373	3.438	0.984	1.607	0.612	-1.634	0.457	0.49
14	CH17-340M24.3	lincRNA	ENSG00000197180	Xq28	-2.333	0	2.812	4.568	0.616	-1.624	3.09e-06	1.75e-05
13	CTD-2538C1.2	lincRNA	ENSG00000267475	19q13.11	-2.358	0	0.68	1.103	0.617	-1.622	2.43e-06	1.45e-05
65	LINC01358	lincRNA	ENSG00000230812	1p32.1	-1.522	0.198	0.658	1.067	0.617	-1.62	0.00234	0.00399
167	RP11-290F5.1	lincRNA	ENSG00000249096	4q35.1	-0.173	5.11	1.006	1.628	0.618	-1.617	0.73	0.756
91	LINC00882	lincRNA	ENSG00000242759	3q13.12	-1.309	0.254	0.846	1.357	0.623	-1.604	0.00888	0.0126
157	RP11-16E12.2	lincRNA	ENSG00000259772	15q13.3	-0.374	3.438	0.91	1.455	0.625	-1.599	0.456	0.49
89	RP11-11N9.4	lincRNA	ENSG00000247134	8p12	-1.31	0.254	0.993	1.583	0.627	-1.595	0.00881	0.0126
42	MIRLET7BHG	lincRNA	ENSG00000197182	22q13.31	-1.726	0.198	1.143	1.815	0.63	-1.587	0.000559	0.00122
97	RP4-798P15.3	processed_transcript	ENSG00000254154	1q25.2	-1.241	0.254	0.714	1.127	0.634	-1.578	0.0131	0.018
135	MIR99AHG	lincRNA	ENSG00000215386	21q21.1	-0.764	1.045	4.956	7.764	0.638	-1.567	0.127	0.149
53	CTD-3252C9.4	lincRNA	ENSG00000267519	19p13.12	-1.649	0.198	19.442	30.32	0.641	-1.56	0.000979	0.00192
115	TEX41	lincRNA	ENSG00000226674	2q22.3	-1.047	0.437	2.132	3.324	0.641	-1.559	0.0363	0.0462
83	LINC00937	lincRNA	ENSG00000226091	12p13.31	-1.35	0.254	0.934	1.451	0.643	-1.554	0.00695	0.0102
48	LL21NC02-21A1.1	lincRNA	ENSG00000273796	21q22.3	-1.679	0.198	0.929	1.428	0.65	-1.538	0.000788	0.00163
139	RP11-394O4.5	lincRNA	ENSG00000269936	5q32	-0.724	1.276	3.888	5.974	0.651	-1.537	0.148	0.172
17	RP11-479G22.8	lincRNA	ENSG00000273038	10p11.22	-2.281	0	1.376	2.098	0.656	-1.524	5.12e-06	2.5e-05
146	LINC00426	lincRNA	ENSG00000238121	13q12.3	-0.639	1.554	1.31	1.996	0.656	-1.524	0.202	0.226
166	RP11-250B2.3	lincRNA	ENSG00000233967	6q14.1	-0.212	4.714	0.97	1.456	0.667	-1.5	0.673	0.701
64	PCED1B-AS1	processed_transcript	ENSG00000247774	12q13.11	-1.525	0.198	14.048	21.048	0.667	-1.498	0.0023	0.00398
51	SNHG9	lincRNA	ENSG00000255198	16p13.3	-1.665	0.198	12.841	19.114	0.672	-1.489	0.00087	0.00174
63	RP11-373D23.3	lincRNA	ENSG00000270210	2p23.2	-1.526	0.198	1.097	1.632	0.672	-1.487	0.00228	0.00396
121	GAS6-AS2	lincRNA	ENSG00000272695	13q34	-0.932	0.658	1.842	2.736	0.673	-1.485	0.0626	0.077
78	LINC01410	lincRNA	ENSG00000238113	9q13	-1.387	0.23	0.83	1.224	0.678	-1.476	0.00555	0.00843
81	LINC00162	lincRNA	ENSG00000275874	21q22.3	-1.367	0.23	3.942	5.804	0.679	-1.472	0.00612	0.00909
26	AP001505.10	lincRNA	ENSG00000276529	21q22.3	-2.092	0	3.135	4.606	0.681	-1.469	2.88e-05	0.000102
153	CERS6-AS1	processed_transcript	ENSG00000227617	2q24.3	-0.458	2.458	3.251	4.777	0.681	-1.469	0.36	0.394
12	CBR3-AS1	processed_transcript	ENSG00000236830	21q22.12	-2.378	0	1.237	1.814	0.682	-1.466	1.98e-06	1.28e-05
164	AP000473.5	lincRNA	ENSG00000228798	21q21.1	-0.231	4.714	0.926	1.353	0.684	-1.461	0.645	0.675
49	RP5-1085F17.3	lincRNA	ENSG00000260257	20q11.21	-1.678	0.198	2.383	3.479	0.685	-1.46	0.000796	0.00164
75	CTD-2341M24.1	lincRNA	ENSG00000258733	14q31.3	-1.404	0.23	1.037	1.505	0.689	-1.451	0.00501	0.00776
90	LINC00346	lincRNA	ENSG00000255874	13q34	-1.31	0.254	1.075	1.558	0.69	-1.449	0.00881	0.0126
41	RP11-1149O23.3	processed_transcript	ENSG00000246582	8p21.3	-1.734	0.198	1.328	1.921	0.692	-1.446	0.000526	0.00116
125	SHANK3	processed_transcript	ENSG00000251322	22q13.33	-0.888	0.658	2.427	3.502	0.693	-1.443	0.076	0.0921
100	RP11-160O5.1	lincRNA	ENSG00000263470	17q24.1	-1.217	0.287	0.722	1.033	0.698	-1.432	0.015	0.0203
71	RP11-33O4.1	lincRNA	ENSG00000272644	2q35	-1.452	0.23	1.166	1.66	0.702	-1.424	0.0037	0.00586
62	RP11-147L13.15	lincRNA	ENSG00000274712	17q24.2	-1.531	0.198	1.914	2.721	0.703	-1.422	0.00222	0.00387
88	CTC-246B18.10	lincRNA	ENSG00000269246	19q13.2	-1.328	0.254	3.906	5.49	0.711	-1.406	0.00793	0.0114
37	AC092171.4	lincRNA	ENSG00000230733	7p22.1	-1.804	0.108	1.269	1.781	0.713	-1.403	0.000309	0.000742
99	RP11-834C11.14	processed_transcript	ENSG00000273046	12q13.13	-1.219	0.287	0.728	1.019	0.714	-1.4	0.0148	0.0201
93	AC004540.5	lincRNA	ENSG00000214870	7p15.2	-1.291	0.254	0.964	1.344	0.717	-1.395	0.00986	0.0139
126	LINC01315	lincRNA	ENSG00000229891	22q13.2	-0.871	0.765	0.805	1.121	0.718	-1.392	0.0817	0.0987
107	RP11-332H14.1	lincRNA	ENSG00000272861	2q12.1	-1.169	0.287	0.844	1.169	0.723	-1.384	0.0195	0.0257
133	LINC01503	lincRNA	ENSG00000233901	9q34.11	-0.778	1.045	10.511	14.546	0.723	-1.384	0.12	0.142
114	RP11-791G15.2	lincRNA	ENSG00000272275	2p25.1	-1.052	0.437	1.241	1.714	0.724	-1.381	0.0356	0.0456
59	RP11-804H8.6	lincRNA	ENSG00000273356	3p21.2	-1.557	0.198	0.854	1.178	0.724	-1.38	0.00186	0.00334
108	LINC00165	lincRNA	ENSG00000261706	21q22.3	-1.16	0.287	1.078	1.486	0.725	-1.379	0.019	0.0252
67	LINC00839	lincRNA	ENSG00000185904	10q11.21	-1.477	0.23	4.98	6.822	0.73	-1.37	0.00315	0.00516
98	LINC01006	lincRNA	ENSG00000182648	7q36.3	-1.221	0.287	3.656	5	0.731	-1.367	0.0147	0.0201
47	LINC00997	lincRNA	ENSG00000281332	7p14.3	-1.689	0.198	0.889	1.213	0.733	-1.365	0.000735	0.00154
84	SNHG17	processed_transcript	ENSG00000196756	20q11.23	-1.349	0.254	13.768	18.708	0.736	-1.359	0.00701	0.0103
152	RP11-380J14.1	lincRNA	ENSG00000204362	1p36.13	-0.46	2.458	1.064	1.435	0.741	-1.349	0.359	0.394
95	RP11-1398P2.1	lincRNA	ENSG00000244459	4p16.3	-1.283	0.254	1.372	1.841	0.745	-1.342	0.0103	0.0144
56	MKLN1-AS	processed_transcript	ENSG00000236753	7q32.3	-1.583	0.198	0.989	1.312	0.753	-1.327	0.00155	0.00289
31	LINC01128	processed_transcript	ENSG00000228794	1p36.33	-2.005	0.056	3.443	4.567	0.754	-1.326	6.09e-05	0.000189
109	RP11-344B5.2	lincRNA	ENSG00000224307	9q34.11	-1.158	0.287	1.727	2.29	0.754	-1.326	0.0207	0.0272
128	LINC00960	lincRNA	ENSG00000242516	3p12.3	-0.823	0.765	1.573	2.086	0.754	-1.326	0.1	0.12
94	LINC01094	lincRNA	ENSG00000251442	4q21.21	-1.286	0.254	6.144	8.126	0.756	-1.323	0.0102	0.0144
116	RP11-932O9.10	lincRNA	ENSG00000269974	15q13.2	-1.01	0.437	1.001	1.324	0.756	-1.323	0.0435	0.0549
143	SNHG4	processed_transcript	ENSG00000281398	5q31.2	-0.699	1.276	6.496	8.597	0.756	-1.323	0.162	0.185
110	LINC00672	lincRNA	ENSG00000263874	17q12	-1.148	0.362	0.99	1.307	0.757	-1.321	0.0218	0.0286
92	RP11-486G15.2	lincRNA	ENSG00000271576	1p31.1	-1.292	0.254	0.819	1.079	0.759	-1.318	0.00978	0.0139
117	URB1-AS1	lincRNA	ENSG00000256073	21q22.11	-1.007	0.437	3.337	4.4	0.759	-1.318	0.044	0.0553
119	CTB-113I20.2	lincRNA	ENSG00000271737	5q31.1	-0.972	0.547	0.937	1.23	0.762	-1.312	0.0521	0.0649
61	RP5-967N21.11	lincRNA	ENSG00000275632	20p12.3	-1.533	0.198	1.562	2.04	0.766	-1.306	0.00218	0.00382
104	CRNDE	lincRNA	ENSG00000245694	16q12.2	-1.195	0.287	20.559	26.844	0.766	-1.306	0.0169	0.0226
124	RP11-472N13.3	lincRNA	ENSG00000237797	10p11.22	-0.892	0.658	1.284	1.676	0.766	-1.305	0.0747	0.0908
76	SNHG15	lincRNA	ENSG00000232956	7p13	-1.401	0.23	16.507	21.506	0.768	-1.303	0.0051	0.00787
140	RP11-760H22.2	lincRNA	ENSG00000254343	8q24.12	-0.721	1.276	3.001	3.908	0.768	-1.302	0.15	0.173
148	RP11-2B6.3	lincRNA	ENSG00000269946	9q22.32	-0.529	2.221	0.911	1.186	0.768	-1.302	0.291	0.323
82	AF127936.9	lincRNA	ENSG00000235609	21q21.1	-1.358	0.23	0.927	1.206	0.769	-1.301	0.00662	0.00976
145	RP11-89K11.1	lincRNA	ENSG00000259658	15q26.3	-0.641	1.554	1.466	1.902	0.771	-1.297	0.2	0.225
118	RP11-488C13.7	lincRNA	ENSG00000258610	14q24.3	-0.998	0.547	3.194	4.133	0.773	-1.294	0.0461	0.0576
151	RP5-1198O20.4	lincRNA	ENSG00000230615	1p34.1	-0.484	2.458	4.356	5.633	0.773	-1.293	0.333	0.367
28	LINC00294	lincRNA	ENSG00000280798	11p13	-2.06	0.056	5.219	6.725	0.776	-1.289	3.8e-05	0.000131
123	RP11-488C13.5	lincRNA	ENSG00000258301	14q24.3	-0.902	0.658	4.39	5.636	0.779	-1.284	0.0716	0.0873
68	CTD-2186M15.3	lincRNA	ENSG00000272086	5p13.3	-1.473	0.23	1.918	2.447	0.784	-1.276	0.00324	0.00526
155	AC006126.4	lincRNA	ENSG00000267045	19q13.32	-0.423	2.915	0.907	1.158	0.784	-1.276	0.399	0.435
137	LINC01480	lincRNA	ENSG00000270164	19q13.2	-0.74	1.045	1.598	2.034	0.785	-1.273	0.139	0.162
96	RP11-203J24.9	processed_transcript	ENSG00000257524	9q34.11	-1.268	0.254	6.552	8.306	0.789	-1.268	0.0113	0.0156
112	DTX2P1-UPK3BP1-PMS2P11	processed_transcript	ENSG00000265479	7q11.23	-1.093	0.362	1.185	1.502	0.789	-1.267	0.0289	0.0373
165	RP11-130L8.1	lincRNA	ENSG00000270100	2p24.1	-0.227	4.714	1.209	1.532	0.79	-1.267	0.651	0.68
87	SNHG6	processed_transcript	ENSG00000245910	8q13.1	-1.338	0.254	103.681	131.212	0.79	-1.266	0.00749	0.0108
105	RP11-225B17.2	lincRNA	ENSG00000273014	7p14.3	-1.185	0.287	2.682	3.392	0.791	-1.265	0.0178	0.0237
147	RP11-706O15.3	lincRNA	ENSG00000234449	Xp22.33	-0.544	2.221	0.892	1.128	0.791	-1.264	0.276	0.307
77	RP11-783K16.13	lincRNA	ENSG00000257086	11q13.1	-1.389	0.23	1.251	1.579	0.792	-1.262	0.0055	0.00839
79	RP11-428J1.5	lincRNA	ENSG00000272142	6p25.1	-1.386	0.23	1.164	1.468	0.793	-1.261	0.0056	0.00847
120	RP13-270P17.3	lincRNA	ENSG00000272688	18p11.31	-0.963	0.547	1.613	2.033	0.793	-1.261	0.0542	0.0673
130	RP11-96H19.1	lincRNA	ENSG00000257261	12q13.11	-0.808	1.045	1.053	1.321	0.797	-1.255	0.106	0.127
136	SNHG19	lincRNA	ENSG00000260260	16p13.3	-0.743	1.045	34.011	42.672	0.797	-1.255	0.138	0.161
154	ZNF582-AS1	lincRNA	ENSG00000267454	19q13.43	-0.428	2.915	1.189	1.492	0.797	-1.255	0.393	0.429
149	AC006129.2	lincRNA	ENSG00000268027	19q13.2	-0.523	2.221	2.9	3.631	0.799	-1.252	0.296	0.328

[truncated: 7 more sheets: S5C README, S5C.1 lncRNAs TCGA all n=74, S5C.2 lncRNAs TCGA epith n=49, S5C.3 miRs TCGA all n=74, S5C.4 miRs TCGA epith n=49, S5C.5 lncRNAs Bueno all n=211, S5C.6 lncRNAs Bueno epith n=141]
