# Supplementary material for: Integrative Molecular Characterization of Malignant Pleural Mesothelioma
Source: Oxford University Press journal article supplement (doi:10.1158/2159-8290.cd-18-0804), 2018-10-15
Supplement: 21598290cd180804-sup-205173_2_supp_5073244_pg14sl.xlsx [file 21598290cd180804-sup-205173_2_supp_5073244_pg14sl.xlsx]

## Sheet: A-SETD2
Differentially methylated probes between SETD2 mutated and WT samples (adjusted p-value < 0.01, abs(delta beta) > 0.3). Positive delta beta means higher methylation in SETD2 WT samples. One probe can be annotated to two genes, in this case, expression log fold change, corresponding adjusted p-value, and Spearman correlation coefficient are given for both genes
probe	delta beta	Adjusted p-value	CpG island relation	Probe location	gene 1	gene 2	Expression log FC for gene 1	Adjusted p-value for gene 1 (Benjamini-Hochberg)	Expression log FC for gene 2	Adjusted p-value for gene 2 (Benjamini-Hochberg)	Spearman correlation of gene 1 expression and DNA methylation	Spearman correlation of gene 2 expression and DNA methylation
cg13403636	0.34	2.36e-10		Body	PSMB7		-0.089	0.918			0.12
cg09555914	-0.35	1.19e-08	Island	5'UTR	ZNF773		1.219	0.001			-0.471
cg15155199	0.41	1.19e-08		Body	SART1		-0.37	0.211			-0.21
cg14297023	0.37	1.19e-08	S_Shelf	3'UTR	EIF3D		-0.115	0.857			-0.23
cg06994572	0.53	3e-08	S_Shelf	3'UTR	B3GNT4		-0.876	0.502			-0.155
cg03493211	0.36	8.18e-08		Body	BAIAP2L1		-0.634	0.509			0.05
cg13209683	0.37	8.18e-08		3'UTR	DDX55		-0.141	0.674			-0.289
cg23782083	0.42	1.24e-07		3'UTR	ASH2L		-0.106	0.937			0.022
cg12740577	0.41	1.24e-07		3'UTR	IMMT		-0.122	0.787			0.012
cg23957742	0.4	1.4e-07		3'UTR	CPSF4		-0.116	0.831			-0.163
cg15185538	0.35	1.62e-07		3'UTR	ALDH18A1		0.288	0.535			0.356
cg13093285	0.35	2.32e-07	S_Shore	Body	HEATR2		-0.2	0.679			0.16
cg20886721	-0.32	3.09e-07		Body	OR8U8
cg15346359	0.37	4.99e-07		3'UTR	NDUFS3		0.097	0.87			0.082
cg05724097	0.32	4.99e-07	S_Shore	Body	PUSL1		-0.75	0.21			-0.349
cg11076668	0.33	6.72e-07	Island	Body	MEX3B		0.235	0.921			0.023
cg21642947	0.43	7.32e-07	S_Shore	3'UTR	PPDPF		-0.507	0.333			-0.314
cg10378348	0.42	7.82e-07	S_Shelf
cg12074025	-0.36	8.1e-07	Island	1stExon	ZNF671		1.865	0.001			-0.57
cg00209918	0.44	1.01e-06	N_Shore	Body	SETD1A		-0.034	0.969			-0.353
cg25415966	0.32	1.22e-06	S_Shore	3'UTR	CABLES2		0.061	0.954			-0.171
cg09375284	0.33	1.22e-06		Body	GIGYF1		-0.114	0.893			-0.145
cg09579704	0.49	1.51e-06		Body	TRIM26		-0.345	0.471			-0.327
cg03313574	0.47	1.79e-06		Body	ORAOV1		0.197	0.613			0.323
cg20618005	0.39	1.79e-06		3'UTR	CALM3		-0.069	0.933			-0.142
cg02492205	0.37	1.96e-06		3'UTR	INO80E		0.279	0.451			0.038
cg00037223	0.46	2.08e-06	N_Shore	3'UTR	MAZ		0.026	0.992			-0.2
cg22575656	0.33	2.3e-06	S_Shore	Body	INTS1		-0.241	0.597			-0.209
cg13326508	-0.41	2.3e-06	S_Shore	TSS1500	MPP2		0.796	0.542			-0.405
cg15597662	0.34	2.63e-06		Body	CASC3		0.117	0.846			-0.039
cg02219878	0.39	3.26e-06	N_Shore	TSS1500	FAM131A		-0.289	0.658			-0.007
cg12178225	0.31	3.26e-06		Body	TRIM26		-0.345	0.471			-0.336
cg01053213	0.32	3.53e-06		3'UTR	THAP3	DNAJC11	-0.061	0.959	-0.077	0.896	-0.218	-0.097
cg07429591	0.37	3.53e-06		TSS1500	LYSMD1	SCNM1	-0.019	1	0.035	0.987	-0.373	-0.185
cg13406593	0.31	3.53e-06
cg08060936	0.39	3.73e-06		3'UTR	CALM3		-0.069	0.933			-0.093
cg01032946	0.4	4.5e-06	N_Shore	Body	SETD1A		-0.034	0.969			-0.399
cg01601746	-0.31	4.51e-06	Island	TSS200	ZNF549		1.983	0			-0.64
cg04947907	0.41	4.56e-06
cg09062663	0.3	4.94e-06		Body	CCT5		0.154	0.817			0.088
cg08258867	0.32	5.17e-06	N_Shore	Body	SLC2A4RG		-0.213	0.761			-0.127
cg02767634	0.46	5.24e-06		3'UTR	RUFY1		-0.18	0.656			-0.161
cg06937351	0.31	5.36e-06		Body	ARHGEF10		-0.08	0.946			0.005
cg09922349	0.36	5.62e-06	N_Shore	Body	FLII		-0.571	0.094			-0.032
cg03255379	0.3	6.15e-06		Body	TCF7L1		-0.135	0.947			-0.075
cg06871123	-0.35	6.2e-06		Body	LOC727924		0.032	0.923			-0.257
cg14193314	0.36	6.58e-06	S_Shelf	Body	COQ4		-0.307	0.634			-0.157
cg22206745	0.51	6.87e-06		Body	ORAOV1		0.197	0.613			0.229
cg10062109	0.46	7.16e-06	Island	Body	CDK10		-0.299	0.612			-0.299
cg11650704	0.41	1.04e-05		3'UTR	ADAR		-0.106	0.873			0.092
cg15726557	0.34	1.18e-05	Island	3'UTR	POLRMT		0.088	0.894			0.003
cg05559648	-0.32	1.21e-05
cg20898078	0.31	1.23e-05		Body	SLC4A2		0.009	1			-0.257
cg08253164	0.43	1.24e-05
cg01637289	0.33	1.45e-05		Body	BCL9L		-0.209	0.781			0.113
cg19819654	0.43	1.63e-05		3'UTR	MRPL4		0.085	0.921			0.097
cg03531787	0.32	1.63e-05		TSS200	SNORD6	SNORA25	0	1	-0.066	0.841		-0.035
cg05177932	0.4	1.71e-05	N_Shore
cg26961166	-0.44	1.8e-05		Body	KCNB2		-1.339	0.228			0.566
cg06999008	-0.37	1.84e-05	S_Shore
cg12981876	0.32	1.94e-05		Body	GIGYF1		-0.114	0.893			-0.311
cg05651995	0.39	1.96e-05		Body	ANKS3		-0.05	0.975			-0.235
cg24900244	0.37	2e-05	S_Shelf	Body	DIABLO		-0.146	0.783			-0.151
cg14215689	0.32	2.02e-05	S_Shore	TSS1500	INPP5E	SEC16A	0.108	0.852	0.113	0.824	0.087	0.214
cg20222695	0.32	2.11e-05		Body	ANKLE2		-0.019	1			0.263
cg12513505	-0.43	2.39e-05	N_Shore
cg11625877	0.32	2.64e-05	Island	3'UTR	TBC1D17		-0.084	0.91			-0.202
cg14642467	0.36	2.84e-05		Body	NPDC1		0.265	0.81			-0.262
cg17336337	0.31	3.07e-05		Body	SUCLG1		-0.12	0.836			0.147
cg08894020	-0.33	3.24e-05
cg04710528	-0.36	3.24e-05	N_Shelf
cg05777316	0.3	3.28e-05	N_Shore	TSS1500	ELMO3	E2F4	-1.588	0.219	-0.196	0.634	-0.358	-0.314
cg25525825	0.33	3.4e-05	N_Shore	Body	TRIM27		-0.299	0.321			-0.267
cg01311313	-0.35	3.4e-05		Body	UNC5D		-1.131	0.352			0.311
cg27117679	-0.3	3.64e-05
cg16768697	0.34	3.67e-05	S_Shore
cg10542362	-0.32	3.86e-05	Island	TSS1500	TNK2		0.17	0.814			0.067
cg04556418	0.34	3.9e-05	S_Shore	Body	CDKN2AIP		-0.213	0.662			-0.06
cg03772227	-0.32	3.96e-05	N_Shelf
cg13758724	0.38	4.34e-05	Island	3'UTR	PLXNB2		0.076	0.921			-0.109
cg07385362	0.39	4.78e-05	N_Shelf	Body	UNKL		-0.119	0.915			-0.32
cg08877257	0.36	4.87e-05	S_Shore	Body	MAZ		0.026	0.992			-0.108
cg18958693	0.44	5.39e-05	N_Shore	Body	PSMG3		0.2	0.739			0.07
cg17341174	0.31	6e-05		Body	BAIAP2L1		-0.634	0.509			-0.053
cg03868944	0.4	6.36e-05		Body	SH3PXD2B		0.766	0.272			0.044
cg26764980	-0.31	6.48e-05		Body	UNC5D		-1.131	0.352			0.481
cg24831305	-0.32	6.93e-05	Island
cg21667998	-0.3	6.95e-05		TSS1500	OR5L2		0	1
cg14630361	0.32	7.22e-05	S_Shelf
cg27455640	0.38	7.36e-05	N_Shore	3'UTR	CSNK1D		0.018	0.991			-0.293
cg10835286	-0.4	7.38e-05	N_Shelf
cg01940753	-0.32	7.65e-05	N_Shore
cg18630667	-0.41	7.65e-05	Island	TSS200	ZNF529	ZNF382	0.731	0.069	1.637	0.004	-0.409	-0.559
cg02587316	-0.4	7.85e-05	Island	TSS200	ZNF529	ZNF382	0.731	0.069	1.637	0.004	-0.432	-0.599
cg17645598	0.36	7.85e-05	S_Shore	Body	UBTF		-0.245	0.352			-0.289
cg13042250	0.39	8.77e-05	N_Shore	Body	PSMG3		0.2	0.739			0.124
cg03742642	0.31	9.08e-05		Body	GOLGA3		0.123	0.816			-0.149
cg00940514	0.34	9.38e-05	N_Shore	Body	ADRM1		-0.234	0.647			-0.316
cg07778315	0.34	0.000101	S_Shore	Body	GOLGA3		0.123	0.816			-0.073
cg19865472	0.32	0.000104	Island	3'UTR	HCN2		-0.127	0.988			0.152
cg08231664	0.4	0.000104		Body	DYNC1H1		-0.368	0.525			-0.214
cg15108645	0.34	0.000104	S_Shore	3'UTR	ADAP1		-0.763	0.325			-0.257
cg04141627	-0.3	0.000112	N_Shelf
cg06487442	0.37	0.000114	S_Shore	3'UTR	TOMM6		-0.209	0.688			-0.278
cg26598918	0.34	0.000121	Island	Body	CDK10		-0.299	0.612			-0.32
cg20151476	0.56	0.000122	N_Shelf	Body	PSMG3		0.2	0.739			0.187
cg08790676	-0.31	0.000124	Island
cg22896354	-0.41	0.000129	Island
cg20651080	0.31	0.000136	N_Shelf	Body	DUS1L		0.199	0.72			0.285
cg06649165	0.3	0.000138	S_Shore	Body	MAP1S		-0.149	0.769			-0.042
cg00622170	0.36	0.000149		Body	C4orf10	NOP14	-0.21	0.796	0.061	0.929	-0.128	0.166
cg02401556	-0.31	0.000149	N_Shore
cg19030994	0.38	0.000156	S_Shore	Body	PDCD6		0.079	0.915			-0.048
cg02004370	0.45	0.000157	N_Shore	3'UTR	PDF	COG8	-0.179	0.824	-0.026	0.987	-0.242	-0.051
cg27608139	0.35	0.000165		Body	DCI		-0.234	0.764			-0.309
cg00528902	-0.34	0.000171	N_Shore	Body	LOC157627		0.035	0.975			0.055
cg25384000	-0.35	0.000175		TSS1500	OR5D16		0.026	0.951			0.14
cg08191993	0.35	0.0002	Island	3'UTR	PHRF1		-0.187	0.624			-0.245
cg18133875	0.3	0.000218	Island	Body	MGAT4B		0.146	0.85			0.126
cg13096351	0.3	0.000219		3'UTR	CTTN		-0.176	0.764			0.066
cg19851594	-0.34	0.000219	Island
cg06397379	-0.37	0.000226	N_Shore	TSS1500	NRG1		-0.411	0.894			0.248
cg02182754	0.36	0.000229		Body	FLOT1		-0.143	0.767			-0.062
cg20659485	0.31	0.00023	S_Shore	3'UTR	UQCRQ		0.235	0.752			0.108
cg09195550	0.31	0.000231	S_Shelf	Body	PFKL		-0.102	0.892			-0.229
cg08373605	-0.35	0.000238		Body	CSMD1		-0.266	0.953			0.449
cg02919794	0.34	0.000244	Island	Body	CSNK1D		0.018	0.991			-0.263
cg01765111	-0.36	0.000246	Island
cg08673909	-0.3	0.000248	Island
cg11218434	0.33	0.000263	N_Shelf	TSS200	SNORA31	TPT1	-0.137	0.895	-0.262	0.759	-0.118	0.016
cg16514113	-0.34	0.000263	N_Shelf
cg21175976	-0.3	0.000268	Island	Body	BLK		-0.162	0.988			-0.089
cg09778357	0.3	0.000284	N_Shore	3'UTR	U2AF2	EPN1	-0.006	1	-0.012	1	0.158	0.033
cg20623506	0.37	0.000293		Body	P4HB		-0.208	0.79			-0.062
cg14632140	-0.34	0.000311		5'UTR	LMO3		0.051	1			-0.077
cg08835985	0.43	0.000328	N_Shore	3'UTR	PDF	COG8	-0.179	0.824	-0.026	0.987	-0.225	-0.096
cg25397945	-0.38	0.000333	Island	Body	ZNF529	ZNF382	0.731	0.069	1.637	0.004	-0.354	-0.561
cg23829990	0.32	0.000363	S_Shore	Body	UNC50		-0.115	0.756			-0.044
cg04431935	0.33	0.000373	N_Shore	3'UTR	UNKL		-0.119	0.915			-0.174
cg12302070	-0.31	0.000376		TSS1500	KCNH7		0.02	1			-0.245
cg09993945	0.36	0.000381	S_Shore	Body	CCAR1		0.009	1			-0.057
cg17054691	0.32	0.000381		Body	P4HB		-0.208	0.79			-0.041
cg22876086	-0.36	0.000392
cg16709294	0.34	0.0004	S_Shore	Body	SFRS5	LOC100289511	-0.313	0.532			0.002
cg11455642	-0.31	0.000415		Body	SORCS3		-2.849	0.106			0.51
cg03377980	-0.32	0.000431	Island
cg19735804	-0.39	0.00045
cg20452657	0.31	0.000451	S_Shore	Body	CSNK2B		-0.15	0.783			-0.125
cg25361651	-0.35	0.000473		Body	DEFB115		0	1
cg19906926	-0.34	0.000487	N_Shore	TSS1500	KLHL5		0.693	0.286			-0.35
cg19997502	-0.46	0.000487	S_Shore
cg05487589	-0.41	0.000583	N_Shore	Body	EBF2		0.428	0.867			0.065
cg06868132	0.31	0.000595	S_Shore	Body	RUFY1		-0.18	0.656			-0.021
cg15180617	0.33	0.000595		Body	LOC285830		-0.275	0.784			-0.118
cg01141339	-0.39	0.000622	S_Shore
cg16983588	0.32	0.000632		Body	PRDM10		-0.245	0.602			0.016
cg12564567	-0.42	0.000655	Island
cg11521427	-0.34	0.000656		TSS200	ANK2		-0.156	0.957			-0.033
cg23939642	0.32	0.000693		Body	SLC38A10		0.053	0.953			-0.166
cg23910430	0.39	0.000693	S_Shelf	Body	GOLGA3		0.123	0.816			-0.121
cg06892815	0.37	0.000715	N_Shore	Body	SETD1A		-0.034	0.969			-0.436
cg20749510	0.35	0.000731	Island	Body	SLC2A4RG		-0.213	0.761			-0.172
cg11300147	-0.33	0.000751	S_Shelf	1stExon	CD163L1		-0.499	0.823			0.242
cg05590735	-0.31	0.000769		Body	OLFM3		-0.287	0.89			0.195
cg00621899	0.37	0.000769	N_Shore	1stExon	UFSP1		-0.38	0.543			-0.428
cg16499416	0.38	0.00078	Island	3'UTR	MACROD1		0.024	1			0.107
cg13069100	0.3	0.00078	Island	3'UTR	ADAM15	EFNA4	-0.292	0.657	0.463	0.342	-0.024	0.094
cg05164406	0.31	0.000791	S_Shelf	Body	C16orf53	MVP	0.44	0.305	0.115	0.893	0.059	-0.02
cg05809481	0.34	0.000822	N_Shore	Body	ISG20L2		0.087	0.914			-0.222
cg04285033	-0.34	0.000837	Island
cg22616525	-0.36	0.00084		TSS1500	LCE2A		-0.029	0.957			0.151
cg04857395	0.35	0.000881	Island	Body	LRPAP1		-0.28	0.707			0.012
cg09373227	0.37	0.000911		Body	ORAOV1		0.197	0.613			0.121
cg16676676	0.33	0.000927	Island	Body	OBSCN		-0.832	0.428			-0.307
cg13369534	-0.36	0.000943
cg03287877	0.33	0.000945	S_Shore	Body	NMT1	DCAKD	-0.333	0.322	-0.183	0.771	-0.083	-0.096
cg01774093	0.31	0.000991	N_Shore	Body	TOPORS		0.145	0.836			-0.019
cg02987249	0.31	0.00102	N_Shelf	Body	TRIP10		0.024	1			-0.031
cg27006914	0.31	0.00102		Body	RNF216		0.202	0.64			0.259
cg25233139	-0.38	0.00104
cg10123293	0.31	0.00109	S_Shelf	Body	UNC50		-0.115	0.756			-0.165
cg00375608	0.39	0.00113	N_Shore	Body	PSMG3		0.2	0.739			0.072
cg16338011	-0.36	0.00116
cg26898127	0.35	0.00119	S_Shore	Body	MUS81		-0.701	0.053			-0.54
cg24974737	-0.34	0.0012	Island
cg08166767	-0.31	0.00121		5'UTR	LCE2A		-0.029	0.957			0.163
cg10152684	0.38	0.00121	S_Shelf
cg23562479	-0.35	0.00121		TSS1500	OR52K2		-0.219	0.442			0.176
cg27321949	0.32	0.00123	Island	Body	LRPAP1		-0.28	0.707			0.072
cg20838162	-0.31	0.00125		Body	FAM19A1		-0.242	0.846			0.167
cg04160694	0.32	0.00128	S_Shelf	Body	DBN1		0.14	0.908			-0.196
cg21119525	-0.31	0.00131	Island	5'UTR	C1orf86		-0.118	0.921			0.112
cg05185038	0.36	0.00134	Island	Body	CRIP2		-0.007	1			-0.314
cg23878564	0.31	0.00134	Island	Body	TNK1		-0.074	0.983			0.307
cg03986574	0.32	0.00139	N_Shore	Body	SF1		-0.338	0.08			-0.092
cg08716584	-0.37	0.00139		Body	MS4A7		0.192	0.911			0.099
cg23323891	-0.33	0.0014
cg09704168	-0.31	0.00141
cg27423216	-0.32	0.00142	S_Shore	Body	NTF3		-1.274	0.483			0.15
cg09721739	-0.45	0.00142	S_Shore	TSS200	NMNAT3		1.967	0.166			-0.781
cg24502901	0.3	0.00144		3'UTR	TCEB3		-0.034	0.976			-0.064
cg23759554	0.32	0.00144		3'UTR	ANKRD52		0.206	0.837			0.248
cg08932654	-0.31	0.00144	S_Shore	TSS1500	ORMDL3		-0.229	0.615			0.076
cg14824052	-0.34	0.00145
cg02319354	-0.33	0.00145	S_Shore
cg05104639	-0.34	0.00154
cg08616654	-0.33	0.00154
cg19241279	-0.32	0.00155
cg05923448	-0.37	0.00158	N_Shore
cg06805323	0.3	0.00158	S_Shore	Body	CSNK2B		-0.15	0.783			-0.179
cg13600314	0.3	0.00159	S_Shelf	5'UTR	ZNF233		1.396	0.077			0.46
cg00700041	-0.32	0.00159	S_Shelf
cg26610812	-0.3	0.00159	Island	1stExon	CABLES1		0.748	0.366			-0.33
cg07260541	-0.39	0.00166
cg19865525	-0.32	0.00166	S_Shore	Body	COL4A3	COL4A4	-0.602	0.856	-1.33	0.551	0.004	0.179
cg25938735	-0.35	0.00166	Island
cg19534805	0.35	0.00167	S_Shelf	Body	KHSRP		-0.094	0.865			-0.091
cg09844292	0.35	0.00167		3'UTR	MASP2		0.2	0.908			-0.079
cg03961481	-0.37	0.00169	N_Shelf	Body	SALL1		-0.53	0.831			0.199
cg09254101	-0.36	0.0017		Body	OTX2OS1
cg18438944	-0.31	0.0018	Island	TSS200	MT1A		1.73	0.422			-0.599
cg01156892	-0.37	0.00181
cg18857314	0.31	0.00182	S_Shelf	Body	ACTR5		0.333	0.322			0.259
cg22325186	0.35	0.00182	N_Shore	Body	FBRSL1		-0.104	0.892			-0.129
cg20663432	-0.38	0.00184		Body	ANO2		-0.839	0.506			0.396
cg25224090	0.31	0.00184	N_Shore	3'UTR	SRRT		0.051	0.913			-0.092
cg23314364	-0.35	0.00185
cg21197224	0.35	0.00191	N_Shore	3'UTR	SFRS1		0.01	1			-0.199
cg05966228	0.3	0.00194		Body	CTCF		-0.209	0.505			-0.241
cg00308159	-0.31	0.00195	Island	TSS1500	MN1		1.141	0.089			-0.31
cg26023709	0.31	0.00197	N_Shore	Body	MRPL43	SEMA4G	-0.166	0.772	-2.338	0.001	0.071	-0.299
cg10160276	-0.37	0.00197	S_Shore	TSS1500	TOX3		-1.289	0.22			0.354
cg01388889	-0.34	0.00198
cg13223858	0.32	0.002	Island	Body	TBC1D22A		-0.249	0.544			-0.145
cg10143811	-0.46	0.002		5'UTR	LMO3		0.051	1			-0.116
cg15928742	0.32	0.00203		3'UTR	GORASP2		0.095	0.784			-0.042
cg05020604	-0.32	0.00204	Island	TSS200	ZNF529	ZNF382	0.731	0.069	1.637	0.004	-0.378	-0.49
cg25027167	-0.3	0.00208	Island	TSS1500	DGAT1		-0.078	0.929			0.013
cg12050706	-0.35	0.00209
cg20824989	-0.41	0.00217	S_Shore
cg11377730	-0.37	0.00217	Island	Body	MTMR7		0.202	0.89			-0.43
cg25384556	-0.32	0.00223	S_Shelf
cg22518373	0.34	0.00224		Body	ENGASE		0.752	0.149			0.176
cg10444806	-0.38	0.00231	S_Shore	TSS1500	ORMDL3		-0.229	0.615			0.038
cg00957641	-0.34	0.00233
cg02482497	0.37	0.00238	S_Shelf	Body	C1orf77		-0.01	1			-0.168
cg00955967	-0.33	0.00238
cg00676711	-0.34	0.00238
cg20154618	-0.33	0.00243		1stExon	CREB3L3		0.258	0.807			-0.015
cg08566449	0.32	0.00249	N_Shore	Body	BAT4		-0.238	0.658			-0.088
cg03661458	-0.3	0.0025	Island
cg08627825	-0.32	0.00254	Island
cg06654901	-0.31	0.00258	Island	Body	PAX1		-0.065	1			0.215
cg18531916	-0.3	0.00263
cg19630689	-0.31	0.00267		TSS1500	SERPINA12		0.017	1			0.058
cg23365563	-0.4	0.00276
cg22450968	-0.32	0.0028	Island
cg01583716	-0.32	0.00281
cg21615583	-0.31	0.00283	Island	TSS200	MIR375
cg26419378	0.33	0.00284		Body	TRIO		0.072	0.975			0.115
cg26081841	-0.36	0.00291
cg02490989	-0.31	0.00291	S_Shore	TSS1500	MTMR7		0.202	0.89			-0.372
cg02779075	-0.38	0.003
cg16296290	-0.32	0.00303	Island	5'UTR	C1orf86		-0.118	0.921			0.012
cg03497652	0.44	0.00303		Body	ANKS3		-0.05	0.975			-0.389
cg03702686	0.31	0.00308	N_Shore	TSS1500	B3GALT4	RPS18	-0.293	0.72	-0.486	0.417	0.143	-0.278
cg00123762	-0.43	0.00309	S_Shore
cg07953015	0.34	0.00313	S_Shelf	3'UTR	SEPW1		0.176	0.837			0.055
cg17172308	-0.32	0.00315	S_Shelf
cg19426572	0.31	0.00315	Island	3'UTR	ARFGAP1		0.283	0.555			0.044
cg13087761	0.36	0.00321	N_Shore	3'UTR	FSCN1		0.407	0.649			0.154
cg26932693	0.31	0.00323		Body	CBX1		-0.111	0.914			-0.169
cg14750367	-0.31	0.00335		Body	RIMS2		-0.229	0.935			0.485
cg13705014	0.32	0.00339		Body	GPSM1		0.164	0.902			-0.249
cg01787574	-0.37	0.0034		5'UTR	LMO3		0.051	1			-0.131
cg13990947	-0.31	0.00343	S_Shore	TSS1500	PLIN2		1.267	0.275			-0.324
cg26251585	-0.32	0.00345		Body	THSD7A		0.57	0.767			0.109
cg24569447	-0.31	0.00345	Island
cg09526758	-0.36	0.00346		5'UTR	LMO3		0.051	1			-0.16
cg09884225	-0.3	0.00346	N_Shelf
cg07734358	0.36	0.00349	Island	Body	TBC1D22A		-0.249	0.544			-0.092
cg10311161	0.33	0.0035		3'UTR	ARFGEF1		0.029	0.977			0.234
cg24733450	-0.31	0.00351	Island
cg13350775	-0.36	0.00353
cg09479341	0.32	0.00354	Island	Body	CNP		-0.588	0.092			-0.151
cg12405742	-0.31	0.0036	N_Shore	5'UTR	THRB		1.232	0.322			-0.35
cg06763054	-0.3	0.00361	Island	5'UTR	MTMR7		0.202	0.89			-0.346
cg13546911	-0.34	0.00362	N_Shelf
cg08168844	0.3	0.00367	S_Shelf	Body	C16orf53	MVP	0.44	0.305	0.115	0.893	-0.014	0.021
cg05973305	-0.36	0.00372
cg09758420	-0.35	0.00386	S_Shore
cg22395355	0.35	0.00392	Island	Body	RAI1		-0.215	0.77			-0.453
cg10513118	-0.32	0.00392		1stExon	SCN2B		0.629	0.79			-0.136
cg11421509	-0.31	0.00393	Island
cg24270629	-0.34	0.00395		Body	DCC		-0.378	0.79			0.234
cg06783429	0.31	0.00403	S_Shore	Body	SND1		-0.112	0.864			0.064
cg00132255	-0.32	0.00403	N_Shore
cg03493146	-0.32	0.00403	N_Shore
cg19435859	0.36	0.00406	Island	3'UTR	KIAA0664		0.17	0.79			0.035
cg07102406	0.41	0.00408		Body	DCI		-0.234	0.764			-0.307
cg04308185	-0.37	0.00415	S_Shore	TSS1500	ORMDL3		-0.229	0.615			0.132
cg10109351	-0.31	0.00423	N_Shore
cg17531849	-0.31	0.00432		5'UTR	HRNBP3		-0.439	0.797			-0.03
cg06557421	-0.33	0.00438	N_Shore	Body	CPXM2		0.096	1			-0.189
cg21067775	0.33	0.0045	Island	Body	EPS15L1		0.338	0.205			0.193
cg19992633	-0.3	0.00455	Island	TSS200	TCL1A		0.494	0.9			-0.053
cg16236851	-0.32	0.00467	S_Shelf
cg22637538	-0.34	0.00474	Island	TSS200	CHRNB1		0.246	0.746			-0.175
cg08344524	-0.31	0.00479
cg25827022	0.31	0.00479	Island	Body	TNK1		-0.074	0.983			0.21
cg07560587	0.37	0.00479	N_Shelf	Body	BANP		-0.027	0.985			-0.021
cg10136560	-0.34	0.00486		Body	MAML3		-0.452	0.634			0.06
cg07911664	-0.36	0.00486	Island
cg18328755	-0.31	0.00487	S_Shore	5'UTR	C1orf94		-0.599	0.516			0.147
cg14495359	-0.32	0.00494	S_Shelf
cg09263099	0.31	0.00503	Island	3'UTR	FBRSL1		-0.104	0.892			-0.15
cg16686951	-0.31	0.00508	S_Shore	Body	CD40		1.309	0.06			-0.703
cg25695610	-0.31	0.00515	Island
cg20084079	-0.34	0.00517		1stExon	OR4A15		0	1
cg09137696	-0.3	0.00518	Island	TSS200	MT1A		1.73	0.422			-0.598
cg07271186	-0.34	0.00518
cg10516886	-0.32	0.00524		TSS1500	CD53		0.344	0.773			-0.163
cg01181415	-0.36	0.00532		5'UTR	LMO3		0.051	1			-0.187
cg26074051	0.31	0.00558	Island	Body	ARHGDIA		0.133	0.812			0.063
cg17102269	-0.37	0.00566		Body	CSMD1		-0.266	0.953			0.36
cg05207637	-0.31	0.00598
cg24152605	-0.34	0.00606	Island	1stExon	ZFP28		1.788	0.069			-0.733
cg19770292	-0.34	0.00615
cg25317460	-0.32	0.0062	S_Shore
cg01110759	-0.31	0.00633	Island	TSS200	MT1A		1.73	0.422			-0.614
cg12651914	-0.36	0.00637	N_Shelf
cg24479590	-0.33	0.00654	Island	TSS200	CHRNB1		0.246	0.746			-0.156
cg22363043	-0.37	0.00655	N_Shore	TSS1500	GABRA5		-1.162	0.671			0.54
cg00794963	0.33	0.00659	Island	Body	LDOC1L		-0.287	0.591			-0.188
cg04014105	-0.3	0.00668	Island	Body	SLC22A16		0.752	0.461			-0.344
cg16265542	-0.33	0.00668		TSS1500	LCE6A		-0.523	0.346			0.295
cg11580948	-0.31	0.0067	S_Shore	Body	FGF5		0.184	0.978			-0.225
cg04258219	-0.35	0.00676	N_Shore
cg03922126	-0.42	0.00687	N_Shore	TSS1500	KCNQ5		0.987	0.618			-0.251
cg19570749	0.37	0.00721		Body	PMS2		-0.07	0.916			-0.181
cg19371339	-0.34	0.00741		TSS1500	LCE2B		0.008	0.955			0.058
cg02807859	-0.35	0.00742
cg02689640	-0.34	0.00742
cg00473257	0.35	0.00744	Island	Body	DAPK3		0.027	1			-0.013
cg14697657	-0.32	0.00749
cg10692870	-0.31	0.00753	Island	Body	FN1		1.635	0.336			-0.288
cg23817169	-0.33	0.00754
cg06118312	-0.33	0.00763		1stExon	GZMA		0.123	0.973			0.076
cg24774306	-0.3	0.00768	S_Shore	Body	CXCL6		0.515	0.926			-0.396
cg00927256	-0.3	0.00781
cg10350263	-0.31	0.00784	N_Shelf
cg26425933	-0.32	0.00787	Island	5'UTR	VWA2		0.282	0.917			-0.228
cg13859208	-0.33	0.008	S_Shore	3'UTR	FZD10		-1.214	0.38			0.128
cg19763428	-0.35	0.00808	N_Shore	Body	PDE1C		0.335	0.912			-0.226
cg15678744	0.32	0.0081		Body	SH3PXD2B		0.766	0.272			-0.092
cg04313756	-0.3	0.00814	Island	TSS1500	TCL1A		0.494	0.9			-0.132
cg00440531	-0.35	0.00829	N_Shore
cg10826197	-0.36	0.0085	S_Shore
cg05182265	0.31	0.00854	S_Shore	Body	UBE3C		-0.115	0.878			0.002
cg16236270	0.39	0.0086	N_Shore	Body	MCM7		-0.072	0.95			0.075
cg05212349	-0.32	0.0087
cg15128141	0.34	0.00871	Island	Body	GALNT9		-1.006	0.579			0.255
cg24730157	0.42	0.00888	Island	Body	AGRN		-0.487	0.588			-0.443
cg26349048	-0.31	0.00889		TSS200	OR5W2		0	1
cg08899626	-0.31	0.00889		1stExon	LDB2		1.16	0.322			-0.122
cg04221650	-0.33	0.00889		1stExon	LCE4A		-0.063	0.247			0.123
cg08194989	-0.3	0.00891	Island	TSS200	ANK1		-0.009	1			-0.003
cg19756821	-0.31	0.00905	Island
cg15903915	-0.33	0.00909		TSS1500	NEUROD6		-0.072	0.785			0.037
cg12296772	-0.42	0.0091	Island	TSS200	MTMR7		0.202	0.89			-0.41
cg16354520	-0.33	0.0091		3'UTR	LCE2A		-0.029	0.957			0.106
cg02495552	0.31	0.00913	S_Shelf	Body	SFRS8		-0.148	0.745			-0.077
cg02512226	-0.32	0.00925	S_Shore	TSS1500	ARMC4		1.034	0.593			-0.37
cg16304521	-0.33	0.00927
cg07329296	0.32	0.00931	Island	Body	ADRM1		-0.234	0.647			-0.301
cg18413062	-0.31	0.00943	N_Shelf	Body	OPCML		-0.917	0.649			0.179
cg19883384	-0.32	0.00952	Island
cg09090582	-0.34	0.00952	N_Shore	5'UTR	CNPY1		-0.851	0.069			0.442
cg25960769	-0.32	0.00962		TSS1500	TREML2		0.138	0.954			0.133
cg03159396	-0.36	0.00972	N_Shore	Body	TFAP2B		0.065	0.953			0.315
cg05974154	-0.31	0.00979
cg01466164	-0.31	0.00982	S_Shore
cg10820045	-0.33	0.00982	N_Shore
cg15460348	-0.37	0.00982		1stExon	SPP1		1.159	0.471			-0.2
cg18433086	-0.33	0.00991	S_Shore	TSS1500	ABL2		0.25	0.783			-0.299

## Sheet: B-BAP1
Differentially methylated probes between BAP1 inactivated (hit 1 and 2) and WT samples (adjusted p-value < 0.01, abs(delta beta) > 0.3). All probes have higher methylation in BAP1 inactivated samples. One probe can be annotated to two genes, in this case, expression log fold change, corresponding adjusted p-value, and Spearman correlation coefficient are given for both genes
probe	delta beta	Adjusted p-value	CpG island relation	Probe location	gene 1	gene 2	Expression log FC for gene 1	Adjusted p-value for gene 1 (Benjamini-Hochberg)	Expression log FC for gene 2	Adjusted p-value for gene 2 (Benjamini-Hochberg)	Spearman correlation of gene 1 expression and methylation	Spearman correlation of gene 2 expression and methylation
cg17877470	-0.35	1.17e-10	Island
cg17809945	-0.35	1.22e-09		TSS1500	SDPR		0.668	0.054			-0.392
cg20461196	-0.42	1.22e-09	Island
cg01268022	-0.46	1.22e-09	N_Shore	Body	FKBP14		0.81	0.006			-0.496
cg23674344	-0.36	2.22e-09	Island	TSS1500	ACSF2		0.705	0.037			-0.355
cg05709578	-0.37	3.92e-09	S_Shore	Body	LOC100192378		0.028	1			-0.292
cg14595683	-0.31	3.92e-09	N_Shore	TSS1500	ZFHX4	LOC100192378	0.27	0.609	0.028	1	-0.294	-0.231
cg06454226	-0.32	5.32e-09	S_Shore	5'UTR	NDC80	METTL4	0.134	0.804	-0.118	0.428	-0.211	0.073
cg03623835	-0.33	1.36e-08	S_Shore	TSS1500	CLDN1		2.503	0			-0.676
cg16016465	-0.34	1.36e-08
cg06197769	-0.39	2.89e-08	N_Shore	TSS1500	CDKN1B		0.178	0.295			-0.142
cg10368049	-0.31	2.89e-08		TSS200	COL1A2		1.205	0.013			-0.541
cg14660676	-0.33	3.5e-08	S_Shore	Body	SQLE		0.772	0.005			-0.549
cg11244402	-0.32	3.5e-08	N_Shore	Body	FOXO1		0.802	0.004			-0.449
cg08164233	-0.3	3.5e-08	S_Shore	Body	RFXAP		0.382	0.1			-0.249
cg19531130	-0.34	3.77e-08	S_Shore	Body	KIAA1377	ANGPTL5	1.421	0	0.075	0.899	-0.683	-0.247
cg25330387	-0.36	4.87e-08	N_Shore	Body	CLDN1		2.503	0			-0.816
cg11837293	-0.35	4.87e-08
cg08336300	-0.32	5.25e-08	S_Shore	Body	SESN1		0.37	0.165			-0.226
cg07730848	-0.31	8.95e-08	S_Shore	TSS1500	MED10		0.207	0.3			-0.044
cg20525461	-0.42	1.43e-07	N_Shelf
cg22807449	-0.33	1.51e-07	S_Shore	TSS200	HOXB2		0.155	0.68			-0.229
cg19914919	-0.38	1.85e-07		TSS1500	TANK		-0.123	0.513			0.056
cg25302646	-0.31	2.01e-07	N_Shore	TSS1500	PRDX6		-0.235	0.397			0.096
cg08038054	-0.37	2.13e-07		TSS1500	GNG11		0.545	0.245			-0.528
cg20313963	-0.32	2.13e-07		TSS1500	SLC2A3		1.053	0.017			-0.386
cg05632420	-0.31	2.22e-07	N_Shore	TSS1500	MKLN1	FLJ43663	-0.028	0.939	0.086	0.892	-0.062	-0.211
cg12396523	-0.31	2.5e-07	N_Shore	5'UTR	TRPS1		1.083	0.001			-0.591
cg23348014	-0.38	4.11e-07		TSS1500	COL1A2		1.205	0.013			-0.531
cg16124981	-0.32	4.66e-07	Island
cg23518541	-0.31	4.66e-07		5'UTR	RARB		0.62	0.093			-0.412
cg01338255	-0.31	5.46e-07	Island
cg11591485	-0.34	5.46e-07		Body	SLC12A8		2.229	0			-0.657
cg03934069	-0.33	6.86e-07	S_Shore	5'UTR	GPSM2		0.545	0.028			-0.373
cg07379703	-0.3	7.34e-07	N_Shore	Body	ARSB		0.556	0.027			-0.212
cg08805748	-0.31	8.21e-07	N_Shore	TSS1500	ABCF1		0.049	0.807			-0.133
cg22777724	-0.33	8.68e-07	S_Shore	TSS200	HOXB2		0.155	0.68			-0.306
cg09313705	-0.31	8.73e-07	S_Shore	TSS200	HOXB2		0.155	0.68			-0.335
cg06826457	-0.31	9.58e-07	N_Shelf
cg07889938	-0.32	1.09e-06	N_Shore	TSS1500	AFF1		-0.55	0.038			0.208
cg04244970	-0.33	1.11e-06		TSS200	SLAMF7		0.826	0.35			-0.532
cg23878241	-0.37	1.22e-06	N_Shore	Body	PPTC7		0.414	0.292			-0.462
cg16341836	-0.34	1.22e-06	S_Shore	5'UTR	STAMBPL1		0.548	0.122			-0.63
cg07837085	-0.3	1.39e-06		TSS200	SLAMF7		0.826	0.35			-0.547
cg00579859	-0.33	1.4e-06	N_Shore	Body	IPMK		0.829	0.065			-0.361
cg07533422	-0.33	1.62e-06
cg02204637	-0.31	1.66e-06	N_Shore
cg12296772	-0.38	1.66e-06	Island	TSS200	MTMR7		0.82	0.003			-0.41
cg05846166	-0.32	1.94e-06	N_Shore	TSS1500	PRSS27		0.62	0.132			-0.362
cg05848863	-0.35	2.25e-06	Island	Body	TSPAN13		2.019	0			-0.629
cg20178976	-0.32	2.74e-06
cg26841048	-0.3	2.85e-06	S_Shore	TSS200	HOXB2		0.155	0.68			-0.394
cg11588197	-0.34	2.85e-06	N_Shore	Body	ETS1		0.298	0.555			-0.449
cg07733851	-0.33	2.9e-06	N_Shore	5'UTR	NR3C1		0.398	0.027			-0.409
cg09233395	-0.3	4.31e-06	N_Shore	5'UTR	TRPS1		1.083	0.001			-0.735
cg13283765	-0.35	4.34e-06
cg10377582	-0.31	4.46e-06	S_Shore	TSS1500	POU6F1		0.179	0.539			-0.227
cg21406461	-0.32	5.05e-06		TSS1500	IFI16		0.635	0.002			-0.524
cg00483304	-0.33	6.53e-06	N_Shore
cg21586453	-0.3	7.67e-06	N_Shore	5'UTR	C5orf33		0.569	0.025			-0.617
cg20001829	-0.32	8.29e-06	S_Shore	5'UTR	TMEM25		1.357	0.001			-0.753
cg06299997	-0.32	8.6e-06		TSS1500	COL1A2		1.205	0.013			-0.465
cg14684457	-0.32	8.68e-06	S_Shore	Body	NFE2L3		0.794	0.012			-0.657
cg27554954	-0.34	9.1e-06	S_Shore	TSS1500	ANXA2		0.28	0.283			-0.216
cg26325335	-0.3	1.49e-05	Island	Body	CAC2D2		-0.175	0.842			-0.043
cg26407571	-0.35	1.66e-05	Island	Body	FLJ12825	LOC100240735	-0.005	1	1.665	0	-0.136	-0.646
cg21273275	-0.33	1.8e-05	Island	TSS1500	GRHL3		0.076	0.969			-0.114
cg01695279	-0.31	1.8e-05	N_Shore	Body	BTBD1		0.253	0.06			-0.364
cg21699330	-0.32	2.03e-05	S_Shore	Body	NFE2L3		0.794	0.012			-0.634
cg17467873	-0.33	2.37e-05	Island	5'UTR	CMBL		2.494	0			-0.845
cg14982203	-0.31	2.8e-05	N_Shore	5'UTR	FOXN3		0.197	0.531			-0.282
cg25913882	-0.3	3.58e-05		Body	CUBN		0.12	0.834			-0.031
cg26503877	-0.32	3.58e-05	N_Shore	Body	ETS1		0.298	0.555			-0.474
cg09287864	-0.32	4.23e-05
cg12799885	-0.31	5.54e-05	Island
cg09181792	-0.31	6.68e-05		TSS1500	CFTR		0.415	0.649			-0.285
cg16575104	-0.31	6.96e-05	S_Shore	TSS200	CMBL		2.494	0			-0.853
cg07570470	-0.32	7.45e-05	Island
cg07130150	-0.32	8.66e-05	S_Shore
cg10178203	-0.31	0.000124	S_Shore	TSS200	CMBL		2.494	0			-0.857
cg01135464	-0.31	0.000185
cg21176603	-0.34	0.000312		Body	FSTL4		-0.518	0.523			0.004
cg02085507	-0.3	0.00042	N_Shore	TSS1500	TRIP10		0.387	0.085			-0.271
cg08253651	-0.3	0.000441	Island	TSS1500	SNRPF		0.08	0.779			0.026
