# Supplementary material for: Integrative Molecular Characterization of Malignant Pleural Mesothelioma
Source: Oxford University Press journal article supplement (doi:10.1158/2159-8290.cd-18-0804), 2018-10-15
Supplement: 21598290cd180804-sup-205173_2_supp_5073245_pg14sl.xlsx [file 21598290cd180804-sup-205173_2_supp_5073245_pg14sl.xlsx]

## Sheet: README
26 July 2016
Microbe screening results from BioBloom Tools
Sara Sagedhi, Michael Smith Genome Sciences Centre, BC Cancer Agency, Vancouver BC Canada
Worksheets
RNAseq n=74 tumor samples
WES n=148 tumor and normal samples (74 tumor and 74 blood normal samples)
Comment
In the worksheets, coloured cells mark microbes and cases in which the normalized abundance is at or above a tentative threshold of 0.2 RPM.

## Sheet: RNA_rpm
LibID	TN	Aspergillus_rpm	Bradyrhizobium_rpm	Burkholderia_rpm	Campylobacter_rpm	Candida_albicans_rpm	Chlamydia_rpm	Clostridium_rpm	cryptococcus_rpm	Escherichia_coli_rpm	Entamoeba_histolytica_rpm	Fusobacterium_nucleatum_rpm	Gordonia_polyisoprenivorans_rpm	Helicobacter_pylori_rpm	Hepatitis_A_B_C_rpm	HPV_Nov_2014_rpm	Human_adenovirus_rpm	Human_herpesvirus_1_rpm	Human_herpesvirus_2_rpm	Human_herpesvirus_3_rpm	Human_herpesvirus_4_rpm	Human_herpesvirus_5_rpm	Human_herpesvirus_6A_rpm	Human_herpesvirus_6B_rpm	Human_herpesvirus_7_rpm	Human_herpesvirus_8_rpm	Human_immunodeficiency_virus_rpm	Human_T_lymphotropic_virus_rpm	Klebsiella_rpm	Listeria_rpm	Mycobacterium_rpm	Mycoplasma_rpm	Polyomaviruses_rpm	Propionibacterium_rpm	Pseudomonas_rpm	Ralstonia_rpm	Rotaviruses_rpm	Saccharomyces_cerevisiae_rpm	Shigella_rpm	Sphingomonas_rpm	Staphylococcus_rpm	Streptococcus_rpm	Yersinia_rpm
TCGA-3H-AB3M	diseased-01A-7dc8b816	0.0134945	0.0134945	0.0404835	0	0	0	0	0.391341	0.890638	0	0	0.026989	0	0	0	0	0	0	0	0	0	0	0	0	0	0	0	0	0	0.053978	0	0	2.2131	0.580264	0.0404835	0	0.134945	0	0.026989	64.5173	1.01209	0
TCGA-3H-AB3S	diseased-01A-53e1f94b	0	0	0.0156359	0	0	0	0	0.26581	0.719249	0	0.0156359	0.125087	0	0	0	0	0	0	0	0	0	0	0	0	0	0	0	0	0	0.0156359	0	0	1.8763	0.26581	0.0625434	0	0.312717	0	0.0625434	26.7686	0.156359	0
TCGA-3H-AB3T	diseased-01A-a18b67df	0	0	0.0170299	0	0	0	0	0.102179	0.647136	0	0	0.0340598	0	0	0	0	0	0	0	0	0	0	0	0	0	0	0	0	0	0.119209	0	0	1.53269	0.647136	0.0851494	0	0.306538	0	0.0170299	30.4835	0.0681196	0
TCGA-3H-AB3U	diseased-01A-01b8ce63	0	0	0.0130819	0	0	0	0	3.04809	0.484032	0	0	0.0392458	0	0	0	0	0	0	0	0	0	0	0	0	0	0	0	0	0	0	0	0	0.627933	0.510196	0.0392458	0	1.34744	0	0.0261639	27.5898	0.117737	0
TCGA-3H-AB3X	diseased-01A-06e474d9	0	0	0.0594321	0	0	0	0	0.683469	0.891481	0	0	0.0594321	0	0	0	0	0	0	0	0	0	0	0	0	0	0	0	0	0	0.014858	0	0	1.44123	0.178296	0.044574	0	0.460598	0	0.029716	79.1189	0.044574	0
TCGA-3U-A98D	diseased-01A-5054b89e	0	0.0331296	0.0165648	0.0331296	0	0	0.0331296	0.795111	0.911065	0	0	0.0165648	0	0	0	0	0	0	0	0	0	0	0	0	0	0	0	0	0	0.0165648	0	0	1.80556	0.41412	0.0496944	0	7.08974	0.0165648	0.0331296	60.3787	0.149083	0
TCGA-3U-A98E	diseased-01A-b9863118	0	0.016674	0.016674	0	0	0	0	0.183415	0.917073	0	0	0.0666962	0	0	0	0	0	0	0	0	0	0	0	0	0	0	0	0	0	0	0	0	0.733658	0.116718	0.0333481	0	0.116718	0	0.0833702	68.0134	0.183415	0
TCGA-3U-A98F	diseased-01A-b44a4129	0.0146068	0	0	0	0	0	0.0146068	0.248316	0.83259	0	0	0	0	0	0	0	0	0	0	0	0	0	0	0	0	0	0	0	0	0.0146068	0	0	1.37304	0.248316	0.0438205	0	0.160675	0.0146068	0.0292137	74.4218	0	0
TCGA-3U-A98G	diseased-01A-06e11878	0.173535	0.0385632	0	0	0	0	0.0192816	0.212098	0.539885	0	0	0	0	0	0	0	0	0	0	0	0	0	0	0	0	0	0	0.0192816	0	0	0	0	0.212098	0.154253	0	0	0.192816	0	0	24.6612	0.0385632	0
TCGA-3U-A98H	diseased-01A-3f20c02c	0	0.049646	0.0330973	0	0	0	0	0.24823	1.17495	0	0	0.0330973	0	0	0	0	0	0	0	0	0	0	0	0	0	0	0	0	0	0.132389	0	0	6.37123	0.49646	0.148938	0	0	0	0.0661946	60.717	0.049646	0
TCGA-3U-A98I	diseased-01A-4c5bcd53	0.119123	0	0	0	0	0	0	0.208465	0.446711	0	0	0	0	0	0	0	0	0	0	0	0	0	0	0	0	0	0	0	0	0	0	0	0.0893423	0.208465	0	0	0.0893423	0	0.0595615	27.9939	0	0
TCGA-3U-A98J	diseased-01A-f95eb3dc	0	0.0328525	0	0	0	0	0	3.5645	1.21554	0	0	0.0164263	0	0	0	0	0	0	0	0	0	0	0	0	0	0	0	0	0	0	0.0164263	0	2.02043	0.344952	0.0821313	0	0.295673	0	0.0164263	66.3457	1.14984	0
TCGA-LK-A4NW	diseased-01A-da195984	0	0.044711	0	0	0	0	0	0.208651	0.223555	0	0	0.834605	0	0	0	0	0	0	0	0	0	0	0	0	0	0	0	0	0	0	0	0	2.60814	1.25191	0.16394	0	0.0745183	0	0.0149037	24.3079	0.178844	0
TCGA-LK-A4NY	diseased-01A-e0848b76	0	0.0310047	0.046507	0	0	0	0	0.232535	0.46507	0	0	0.775117	0	0	0	0	0	0	0	0	0	0	0	0	0	0	0	0	0	0	0	0	3.72056	1.06966	0.0310047	0	0.155023	0.0155023	0.046507	35.5624	0.387558	0
TCGA-LK-A4NZ	diseased-01A-c635ded2	0	0.0604227	0	0	0	0	0	0.0604227	0.271902	0	0	0.830812	0	0	0	0	0	0	0	0	0	0	0	0	0	0	0	0	0	0	0	0	2.08458	0.770389	0.10574	0	0.0755283	0	0.120845	31.8276	0.151057	0
TCGA-LK-A4O0	diseased-01A-9af6ff5c	0	0.0386101	0.01287	0	0	0	0	0.231661	0.244531	0	0	0.463321	0	0	0	0	0	0	0	0	0	0	0	0	0	0	0	0.01287	0	0.01287	0	0	5.84299	0.785072	0.0514801	0	0.0514801	0	0.0257401	25.547	0.257401	0
TCGA-LK-A4O2	diseased-01A-fe8b28e6	0	0.0547344	0.0136836	0	0	0	0	0.068418	0.218938	0	0	0.355774	0	0	0	0	0	0	0	0	0	0	0	0	0	0	0	0	0	0	0	0	1.62835	0.615762	0.0136836	0	0.0547344	0	0.0957852	27.7093	0.670496	0.0136836
TCGA-LK-A4O5	diseased-01A-d29ca682	0	0.0231841	0	0	0	0	0	0.0231841	0.486866	0	0	0.324577	0	0	0	0	0	0	0	0	0	0	0	0	0	0	0	0	0	0.0347761	0.011592	0	1.47219	0.278209	0.011592	0	0.011592	0.011592	0	35.9701	0.0231841	0
TCGA-LK-A4O6	diseased-01A-ca21326a	0	0.126742	0.0543182	0	0	0	0	0.325909	0.50697	0	0	1.43038	0	0	0	0	0	0	0	0.0181061	0	0	0	0	0	0	0	0	0	0.0362121	0	0	4.96106	1.64765	0.0362121	0	0.253485	0	0.0543182	43.0924	0.217273	0
TCGA-LK-A4O7	diseased-01A-de32cb69	0	0.0262351	0	0	0	0	0	0.131175	0.183646	0	0	0.432879	0	0	0	0	0	0	0	0	0	0	0	0	0	0	0	0	0	0	0	0	1.1937	0.459114	0.0131175	0	0.0524701	0	0.0262351	24.3724	0.170528	0
TCGA-MQ-A4KX	diseased-01A-03117c7b	0	0.0135847	0.0271693	0	0	0	0	2.66259	0.217354	0	0	0.652063	0	0	0	0	0	0	0	0	0	0	0	0	0	0	0	0	0	0	0	0	1.766	0.58414	0.108677	0	0.855833	0	0.0135847	22.1973	0.108677	0
TCGA-MQ-A4LC	diseased-01A-ab84c983	0.0131273	0.1444	0.0393818	0	0	0	0.0656363	0.511963	0.367563	0	0	0.66949	0	0	0	0	0	0	0	0	0	0	0	0	0	0	0	0	0	2.90112	0	0	2.29727	0.879526	0.0787636	0	0.210036	0	0.511963	31.8599	0.236291	0
TCGA-MQ-A4LJ	diseased-01A-8112112b	0	0.0420284	0.0140095	0	0	0	0	0.0560379	0.280189	0	0	0.700474	0	0	0	0	0	0	0	0	0	0	0	0	0	0	0	0	0	0	0	0	1.51302	0.742502	0.0280189	0	0.0140095	0	0.0560379	30.3585	0.0700474	0
TCGA-MQ-A4LM	diseased-01A-bd1a7aa0	0.0138635	0.0277269	0.0415904	0	0	0	0.0277269	8.99739	0.221816	0	0	0.471358	0	0	0	0	0	0	0	0	0	0	0	0	0	0	0	0	0	0	0	0	2.49543	0.95658	0.0693174	0	6.41879	0.0138635	0.0693174	26.9922	1.55271	0
TCGA-MQ-A4LP	diseased-01A-1283f617	0	0.0602551	0.0301275	0	0	0	0.0150638	1.88297	0.150638	0	0.0150638	0.647742	0	0	0.0451913	0	0	0	0	0	0	0	0	0	0	0	0	0	0	0	0	0	2.09386	0.662806	0.0451913	0	0.24102	0.0150638	0.0301275	21.9931	0.0903826	0
TCGA-MQ-A4LV	diseased-01A-00312493	0	0.0138346	0	0	0	0	0.0415039	0.152181	0.193685	0	0	0.276693	0	0	0.0415039	0	0	0	0	0	0	0	0	0	0	0	0	0	0	0	0	0	1.02376	0.38737	0.0276693	0	0.0691732	0	0.0276693	19.4792	0.0276693	0.0138346
TCGA-MQ-A6BL	diseased-01A-b57552b8	0.0148688	0.0743438	0.0297375	0.0148688	0	0	0	0.133819	0.416325	0	0	0.713701	0	0	0	0	0	0	0	0	0	0	0	0	0	0	0	0.0148688	0	0	0	0	2.46821	1.24898	0.11895	0	0	0	0.0743438	47.1637	0.223031	0
TCGA-MQ-A6BQ	diseased-01A-d65e082e	0.0131326	0.0262651	0.0393977	0	0	0	0	0.0787954	0.315182	0	0	0.341447	0	0	0	0	0	0	0	0	0	0	0	0	0	0	0	0	0	0	0	0	1.56278	0.590966	0.0131326	0	0.0262651	0	0.0656629	39.7917	0.183856	0
TCGA-MQ-A6BR	diseased-01A-1907a3a3	0	0.030712	0.0614241	0	0	0	0	1.52025	0.337832	0	0	0.414612	0	0	0	0	0	0	0	0	0	0	0	0	0	0	0	0.015356	0	0.0614241	0.015356	0	1.18241	5.19033	0.0614241	0	0.737089	0	0.0767801	48.525	0.184272	0
TCGA-MQ-A6BS	diseased-01A-82aa5d51	0.551801	0.0315315	0.0315315	0	0	0	0	2.3018	0.315315	0	0	0.378378	0	0	0	0	0	0	0	0	0	0	0	0	0	0	0	0	0	0	0	0	1.00901	0.614864	0.0157657	0	1.76576	0	0.126126	41.9842	0.0472972	0.0157657
TCGA-NQ-A638	diseased-01A-6467126b	0	0.063978	0	0	0	0	2.66148	0.0767736	0.307094	0	0	0.601393	0	0	0.230321	0	0	0	0	0	0	0	0	0	0	0	0	0.0127956	0	0	0	0	3.45481	4.59362	0.0255912	0	0.0383868	0	0.102365	30.3384	0.153547	0
TCGA-SC-A6LM	diseased-01A-289bfe24	0	0.0365211	0.164345	0	0	0	0	0.0182605	0.32869	0	0	0.34695	0	0	0	0	0	0	0	0	0	0	0	0	0	0	0	0	0	0	0	0	1.55215	0.584337	0.0365211	0	0	0.0182605	0.0365211	42.7114	0.127824	0
TCGA-SC-A6LN	diseased-01A-8d7f304e	0.0149403	0.119522	0.0298806	0	0	0	0	5.27392	0.328686	0	0	1.01594	0	0	0	0	0	0	0	0	0	0	0	0	0	0	0	0	0	0.119522	0	0	3.60061	0.971118	0.0896417	0	3.54085	0	0.179283	44.8956	0.164343	0
TCGA-SC-A6LP	diseased-01A-d2362762	0	0.099211	0.0496055	0	0	0	0	0.0661407	0.413379	0	0	0.727547	0	0	0	0	0	0	0	0	0	0	0	0	0	0	0	0.0165352	0	0.0165352	0	0	3.70388	0.843293	0.0330703	0	0.0661407	0	0.0165352	47.1748	0.314168	0
TCGA-SC-A6LQ	diseased-01A-542fbbaa	0	0.0429786	0.0286524	0	0	0	0.0143262	0.0143262	0.343829	0	0	0.41546	0	0	0	0	0	0	0	0	0	0	0	0	0	0	0	0	0	0.0143262	0	0	1.44695	0.386808	0.0143262	0	0.0286524	0	0.0573048	39.9845	0.143262	0
TCGA-SC-A6LR	diseased-01A-6fe62a0e	0	0.0302475	0	0	0	0	0	0.12099	0.620073	0	0.0151237	0.514207	0	0	0	0	0	0	0	0	0	0	0	0	0	0	0	0	0	0	0	0	2.07195	0.52933	0.0453712	0	0.12099	0	0.0453712	51.8441	0.196608	0
TCGA-SC-AA5Z	diseased-01A-0d7594e4	0	0.0152475	0.0152475	0	0	0	0	0.274456	1.02159	0	0	0.0304951	0	0	0	0	0	0	0	0	0	0	0	0	0	0	0	0.0152475	0	0	0	0	4.10159	0.426931	0.0304951	0	0.182971	0	0.0762377	66.3878	0.0609902	0
TCGA-SH-A7BC	diseased-01A-76258e78	0	0.0242196	0	0	0	0	0	0.121098	0.435954	0	0	0.193757	0	0	0	0	0	0	0	0	0	0	0	0	0	0	0	0	0.0121098	0	0	0	0.980895	0.254306	0	0	0	0	0.0242196	38.7878	0.157428	0
TCGA-SH-A7BD	diseased-01A-fd29e19b	0	0.122138	0.0348966	0	0	0	0.383863	0.0523449	0.418759	0	0	0.750277	0	0	0	0	0	0	0	0	0	0	0	0	0	0	0	0	0	0.0174483	0	0	3.85607	0.994553	0.0872415	0	0.10469	0	0.0174483	38.9446	0.174483	0
TCGA-SH-A9CT	diseased-01A-fe0a5af6	0	0	0	0	0	0	0	0.750468	0.862239	0	0	0.079837	0	0	0	0	0	0	0	0	0	0	0	0	0	0	0	0	0	0	0	0	2.34721	0.526924	0.0479022	0	0.223544	0	0	63.3746	0.0638696	0.0159674
TCGA-SH-A9CU	diseased-01A-bc24322c	0	0	0.0248567	0	0	0	0	0.0994269	0.894842	0	0	0.0994269	0	0	0	0	0	0	0	0	0	0	0	0	0	0	0	0	0	0.0497135	0	0	4.34993	0.273424	0.0994269	0	0.0497135	0	0.0745702	74.4211	0.0745702	0
TCGA-TS-A7OU	diseased-01B-2e330a2c	0	0.036302	0.018151	0	0	0	0.036302	0.544531	1.30687	0	0.018151	0.108906	0	0	0	0	0	0	0	0	0	0	0	0	0	0	0	0	0	0	0	0	3.28534	2.79526	0.254114	0	0.308567	0	0.163359	62.4395	0.127057	0
TCGA-TS-A7OY	diseased-01A-f4b98593	0	0.0436959	0.0145653	0	0	0	0	0.0582612	0.24761	0	0	0.611743	0	0	0	0	0	0	0	0	0	0	0	0	0	0	0	0	0	0	0	0	1.98088	0.7137	0.0582612	0	0	0	0.0145653	32.0728	0.174784	0
TCGA-TS-A7OZ	diseased-01A-d5a18b3d	0	0	0.101419	0	0	0	0	0.0289769	0.84033	0	0	0.101419	0	0	0	0	0	0	0	0	0	0	0	0	0	0	0	0	0	0.0289769	0	0	1.85452	0.550561	0.115908	0	0.0289769	0	0.0579538	41.408	0.217327	0
TCGA-TS-A7P0	diseased-01A-9de98d8c	0	0.0287146	0.0717864	0	0	0	0.0143573	0.0717864	0.47379	0	0.0143573	0.559934	0	0	0	0	0	0	0	0	0	0	0	0	0	0	0	0.0287146	0	0	0	0	3.14424	0.703507	0.100501	0	0.0430718	0.0287146	0.0287146	54.4572	0.330217	0
TCGA-TS-A7P1	diseased-01A-99304d42	0	0	0.033331	0	0	0	0	0.366641	0.799943	0	0	0.0166655	0	0	0	0	0	0	0	0	0	0	0	0	0	0	0	0.0166655	0	0.0166655	0	0	4.13304	2.41649	0.0666619	0	0.149989	0	0.0166655	45.9967	0.199986	0
TCGA-TS-A7P3	diseased-01A-38ff3684	0	0.0759236	0.0189809	0	0	0	0	0.0569427	0.607389	0	0	0	0	0	0	0	0	0	0	0	0	0	0	0	0	0	0	0	0	0.0189809	0	0	1.46153	58.1765	0.132866	0	0.0189809	0	0.0189809	35.2855	0.0189809	0
TCGA-TS-A7P6	diseased-01A-ba124c56	0.0181484	0.163335	0.0725935	0	0	0	0	0.145187	0.653341	0	0	1.03446	0	0	0	0	0	0	0	0	0	0	0	0	0	0	0	0	0	0	0	0	2.37744	1.19779	0.0362967	0	0.0907418	0	0.0725935	61.5955	0.145187	0
TCGA-TS-A7P8	diseased-01A-3d627ad5	0	0.0792095	0.0158419	0	0	0	0	0.158419	0.538624	0	0	0.649518	0	0	0	0	0	0	0	0	0	0	0	0	0	0	0	0	0	0.0158419	0	0	2.8357	0.998039	0.0475257	0	0.0950514	0	0.0633676	46.892	0.221787	0
TCGA-TS-A7PB	diseased-01A-2c405115	0.0147794	0.103456	0.0591176	0.0147794	0	0	0.0147794	0.354706	0.354706	0	0.0295588	1.24147	0	0	0	0	0	0	0	0	0	0	0	0	0	0	0	0	0	0.0443382	0	0	6.69507	1.38926	0.133015	0	0.280809	0	0.0443382	49.0676	0.694632	0
TCGA-TS-A8AI	diseased-01A-df3a6592	0	0	0.0257646	0	0	0	0	0.180352	0.798703	0	0	0.0772939	0	0	0	0	0	0	0	0	0	0	0.0901762	0	0	0	0	0	0.0386469	0	0	0	2.03541	0.644116	0.0644116	0	0.115941	0.0128823	0.0257646	61.4615	0.154588	0
TCGA-TS-A8AS	diseased-01A-ac598633	0.0346896	0	0.0693793	0	0	0	0	0.503	0.849896	0	0	0.0346896	0	0	0	0	0	0	0	0	0	0	0	0	0	0	0	0	0	0	0	0	2.09872	0.416276	0.138759	0	0.346896	0	0.0520344	29.6249	0.0693793	0
TCGA-TS-A8AV	diseased-01A-f3f42b7b	0	0	0.0272244	0	0	0	0	2.92662	0.830344	0	0.0136122	0.0544488	0	0	0	0	0	0	0	0	0	0	0	0	0	0	0	0	0	0.0272244	0	0	2.19156	0.394754	0.12251	0	1.18426	0	0.108898	48.3778	0.299468	0
TCGA-TS-A8AY	diseased-01A-4443ff73	0	0.02979	0.014895	0	0	0	0	0.104265	0.68517	0	0	0.014895	0	0	0	0	0	0	0	0	0	0	0	0	0	0	0	0	0	0	0	0	1.04265	0.14895	0.02979	0	0.08937	0	0	55.6924	0	0
TCGA-UD-AABZ	diseased-01A-030e0f2d	0.0229475	0.0458949	0.0229475	0	0	0	0.0229475	7.2514	2.29475	0	0	0.27537	0	0	0	0	0	0	0	0	0	0	0	0	0	0	0	0	0.0229475	0.0458949	0	0	5.11728	0.940846	0.27537	0	2.57012	0	0.229475	93.6716	0.206527	0
TCGA-UD-AAC1	diseased-01A-70829be3	0.0221853	0.0110927	0.0887414	0	0	0	0.0221853	0.0776487	0.476985	0	0	0.033278	0	0	0	0	0	0	0	0.0443707	0	0	0	0	0	0	0	0	0	0.0110927	0	0	0.476985	0.177483	0.0554634	0	0.0887414	0	0.0110927	29.5065	0.0221853	0
TCGA-UD-AAC4	diseased-01A-b4cc8efe	0	0	0.0127363	0	0	0	0	0.152836	0.649552	0	0	0.0127363	0	0	0	0	0	0	0	0	0	0	0	0	0	0	0	0	0.0127363	0	0	0	0.917015	0.178308	0.0254726	0	0.0509453	0	0.0127363	65.9869	0	0
TCGA-UD-AAC6	diseased-01A-cdebbfc7	0.0670803	0	0	0	0	0	0.0335401	0.251551	0.503102	0	0	0	0	0	0	0	0	0	0	0	0	0	0	0	0	0	0	0	0	0	0	0	0.905584	0.184471	0.0167701	0	0.352171	0	0.10062	35.0997	11.3198	0
TCGA-UD-AAC7	diseased-01A-c0ad3839	0.0145284	0.0145284	0.0145284	0	0	0	0.0145284	0.101699	0.334153	0	0	0.0145284	0	0	0	0	0	0	0	0	0	0	0	0	0	0	0	0	0	0.0145284	0	0	0.886231	0.755475	0.0145284	0	0.217926	0.0145284	0.0581135	33.2554	0.0726419	0
TCGA-UT-A88C	diseased-01B-395c9514	0	0	0.0316568	0	0	0	0	0.0316568	0.474852	0	0	0.0316568	0	0	0	0	0	0	0	0	0	0	0	0	0	0	0	0	0	0	0	0	0.633136	0.443195	0.0316568	0	0.142456	0.0158284	0.0474852	28.8868	0.0158284	0
TCGA-UT-A88D	diseased-01B-5e92c6d6	0	0	0	0	0	0	0	0	0.875062	0	0	0.0525037	0	0	0	0	0	0	0	0	0	0	0	0	0	0	0	0	0	0	0	0	0.525037	0.14001	0.070005	0	0.0525037	0.0350025	0.0175012	60.5193	0.0350025	0
TCGA-UT-A88E	diseased-01B-5a6cf2bd	0.0123519	0.0123519	0.0617594	0	0	0	0	0.0370557	0.592891	0	0	0	0	0	0	0	0	0	0	0	0	0	0	0	0	0	0	0	0	0	0	0	0.71641	0.247038	0.0370557	0	0.0247038	0	0.0123519	31.7073	0.407612	0
TCGA-UT-A88G	diseased-01B-81772ecd	0	0	0	0	0	0	0	0.0434988	0.565484	0	0	0.0289992	0	0	0	0	0	0	0	0	0	0	0	0	0	0	0	0	0	0	0	0	0.405989	0.130496	0.0579984	0	0.0144996	0	0	38.2644	0	0
TCGA-UT-A97Y	diseased-01A-cea00c6d	0.0352825	0.0176413	0.0176413	0	0	0	0.0176413	0.246978	1.21725	0	0	0.123489	0	0	0	0	0	0	0	0	0	0	0	0	0	0	0	0	0	0	0	0	2.5227	1.12904	0.176413	0	0.123489	0	0.0882063	68.9773	0.56452	0
TCGA-YS-A95B	diseased-01A-484c05a1	0	0.0127627	0.0127627	0	0	0	0	0.229728	0.344592	0	0	0.0127627	0	0	0	0	0	0	0	0	0	0	0	0	0	0	0	0	0	0	0	0	0.829574	0.969963	0.0127627	0	0.370118	0	0	19.1185	0	0
TCGA-YS-A95C	diseased-01A-a27e8b7d	0	0	0.0196925	0	0	0	0.0196925	2.91448	0.531696	0	0	0.0393849	0	0	0	0	0	0	0	0	0	0	0	0	0	0	0	0	0	0	0	0	1.75263	0.23631	0.137847	0	1.35878	0	0.492311	21.9965	0.0393849	0
TCGA-YS-AA4M	diseased-01A-8acdbf3d	0	0	0	0.0142448	0	0	0.0427343	0.156692	0.398853	0	0	0.0569791	0	0.0142448	0	0	0	0	0	0	0	0	0	0	0	0	0	0	0	0.0142448	0	0	1.01138	0.427343	0.0712238	0	0.170937	0	0.227916	23.8457	0.142448	0
TCGA-ZN-A9VO	diseased-01A-66ebaba2	0	0.0115273	0.046109	0	0	0	0	0.0576363	0.899126	0	0	0.0576363	0	0	0	0	0	0	0	0	0	0	0	0	0	0	0	0	0	0	0	0	0.910653	0.288181	0.380399	0	0.046109	0	0.0115273	57.5441	0.138327	0
TCGA-ZN-A9VP	diseased-01A-465f90cc	0	0	0.0149094	0	0.0149094	0	0	0.0447281	0.864743	0	0	0.0447281	0	0	0	0	0	0	0	0	0	0	0	0	0	0	0	0	0	0	0	0	0.328006	0.134184	0	0	0	0	0.0447281	84.4615	0	0
TCGA-ZN-A9VQ	diseased-01A-d4b55f1b	0	0.0111239	0.0111239	0	0	0	0.0111239	0.155734	0.800918	0	0	0.0556193	0	0	0	0	0	0	0	0	0	0	0	0	0	0	0	0	0	0	0	0	0.522821	0.14461	0.0444954	0	1.15688	0.0111239	0.0444954	72.294	0.077867	0
TCGA-ZN-A9VS	diseased-01A-62712e93	0	0	0.0162013	0	0	0	0	0.162013	0.388832	0	0	0.0162013	0	0	0	0	0	0	0	0	0	0	0	0	0	0	0	0	0	0.0162013	0	0	1.13409	0.194416	0.0162013	0	0.259221	0	0.0324027	19.4578	0.113409	0
TCGA-ZN-A9VU	diseased-01A-cdca5d6b	0	0	0.0276585	0	0	0	0	0.19361	0.401049	0	0	0.0138293	0	0	0	0	0	0	0	0	0	0	0	0	0	0	0	0	0	0	0	0	0.677634	0.304244	0	0	0.152122	0	0	23.4544	0.0414878	0
TCGA-ZN-A9VV	diseased-01A-b2cfcc9b	0.0245143	0.0245143	0	0	0	0	0.0245143	3.50554	0.612856	0	0	0.098057	0	0	0	0	0	0	0	0	0	0	0	0	0	0	0	0	0	0.0490285	0	0	2.7456	0.612856	0.098057	0	4.26548	0	0.220628	30.0054	0.0735428	0
TCGA-ZN-A9VW	diseased-01A-51544c7a	0	0.0263287	0	0	0	0	0	0.210629	0.276451	0	0	0.0263287	0	0	0	0	0	0	0	0	0	0	0	0	0	0	0	0	0	0	0	0	0.69771	0.131643	0.0263287	0	0.0921503	0	0.0131643	21.3262	0	0

## Sheet: WES_rpm
LibID	TN	Aspergillus_rpm	Bradyrhizobium_rpm	Burkholderia_rpm	Campylobacter_rpm	Candida_albicans_rpm	Chlamydia_rpm	Clostridium_rpm	cryptococcus_rpm	Escherichia_coli_rpm	Entamoeba_histolytica_rpm	Fusobacterium_nucleatum_rpm	Gordonia_polyisoprenivorans_rpm	Helicobacter_pylori_rpm	Hepatitis_A_B_C_rpm	HPV_Nov_2014_rpm	Human_adenovirus_rpm	Human_herpesvirus_1_rpm	Human_herpesvirus_2_rpm	Human_herpesvirus_3_rpm	Human_herpesvirus_4_rpm	Human_herpesvirus_5_rpm	Human_herpesvirus_6A_rpm	Human_herpesvirus_6B_rpm	Human_herpesvirus_7_rpm	Human_herpesvirus_8_rpm	Human_immunodeficiency_virus_rpm	Human_T_lymphotropic_virus_rpm	Klebsiella_rpm	Listeria_rpm	Mycobacterium_rpm	Mycoplasma_rpm	Polyomaviruses_rpm	Propionibacterium_rpm	Pseudomonas_rpm	Ralstonia_rpm	Rotaviruses_rpm	Saccharomyces_cerevisiae_rpm	Shigella_rpm	Sphingomonas_rpm	Staphylococcus_rpm	Streptococcus_rpm	Yersinia_rpm
TCGA-3H-AB3M	diseased-01A-0fa1a82a	0	0	0	0	0	0	0	0.0154112	0	0	0	0	0	0	0	0	0	0	0	1.15584	0	0	0	0.0308225	0	0	0	0	0	0	0	0	0.0924674	0.631861	0.0154112	0	0	0	0	0	0	0
TCGA-3H-AB3M	normal-10A-731190e5	0	0	0	0	0	0	0	0	0	0	0	0	0	0	0	0	0	0	0	0	0	0	0	0.0258286	0	0	0	0	0	0	0	0	0.0129143	2.19543	0	0	0	0	0	0	0	0
TCGA-3H-AB3S	diseased-01A-483a4418	0	0	0.0493381	0	0	0	0	0	0	0	0	0	0	0	0	0	0	0	0	0.78941	0	0	0	0.016446	0	0.016446	0	0	0	0	0	0	0.0493381	0.411151	0	0	0	0	0	0	0	0
TCGA-3H-AB3S	normal-10A-b49fcd56	0	0	0	0	0	0	0	0.0123275	0	0	0	0	0	0	0	0	0	0	0	0.0123275	0	0	0	0.0493099	0	0	0	0	0	0	0	0	0	0.97387	0.0123275	0	0	0	0	0.0123275	0	0
TCGA-3H-AB3T	diseased-01A-a7bb9b21	0	0	0	0	0	0	0	0	0	0	0	0	0	0	0	0	0	0	0	0.484794	0.0156385	0	0	0	0	0.0781925	0	0	0	0	0	0	0.0156385	0.250216	0	0	0	0	0	0.031277	0	0
TCGA-3H-AB3T	normal-10A-19dfa664	0	0	0	0	0	0	0	0	0	0	0	0	0	0	0	0	0	0	0	0	0	0	0	0.0316071	0	0	0	0	0	0	0	0	0.173839	0.347678	0	0	0	0	0	0	0	0
TCGA-3H-AB3U	diseased-01A-d48cc11f	0	0	0	0	0	0	0	0.0146229	0	0	0	0	0	0	0	0	0	0	0	0.965112	0	0	0	0.0584916	0	0	0	0.0146229	0	0	0	0	0.204721	0.55567	0	0	0	0	0	0	0	0
TCGA-3H-AB3U	normal-10A-eef39bf8	0	0	0	0	0	0	0	0	0	0	0	0	0	0	0	0	0	0	0	0	0	0	0	0.0120959	0	0	0	0	0	0	0	0	0.0725757	0.810428	0	0	0	0	0.0241919	0	0	0
TCGA-3H-AB3X	diseased-01A-57d9e117	0	0	0	0	0	0.0184449	0	0	0	0	0	0	0	0	0	0	0	0	0	0	0	0	0	0	0	0	0	0	0	0	0	0	0.0368898	0.129114	0	0	0	0	0	0	0	0
TCGA-3H-AB3X	normal-10A-d6ce0c3d	0	0	0	0	0	0	0	0	0.585545	0	0	0	0	0	0	0	0	0	0	0.229126	0.178209	0	0	0	0	0	0	1.62934	0	0	0	0	0.140022	1.20928	0	0	0	0	0	0	0.0509169	0.0381877
TCGA-3U-A98D	diseased-01A-59ef3e56	0	0	0	0	0	0	0	0.015734	0	0	0	0	0	0	0	0	0	0	0	0	0	0	0	0.015734	0	0	0	0	0	0	0	0	0.0629361	0.456287	0.015734	0	0	0	0	0	0.015734	0
TCGA-3U-A98D	normal-10A-e5320445	0	0	0	0	0	0	0	0	0.100173	0	0	0	0	0	0	0	0	0	0	0	0	0	0	0.0166955	0	0	0	0.0500865	0	0	0	0	0.0500865	0.717906	0	0	0	0	0	0	0.0500865	0
TCGA-3U-A98E	diseased-01A-f8ff44a	0	0	0	0	0	0	0	0.0168643	0.0337287	0	0	0	0	0	0	0	0	0	0	0	0	0	0	0	0	0.0337287	0	0	0	0	0	0	0.0337287	0.50593	0	0	0	0	0	0	0	0
TCGA-3U-A98E	normal-10A-9082faae	0	0	0.0159825	0	0	0	0	0	0	0	0	0	0	0	0	0	0	0	0	0	0	0	0	0.0159825	0	0	0	0	0	0	0	0	0.143843	0.575371	0	0	0	0	0	0	0.0639302	0
TCGA-3U-A98F	diseased-01A-c7d76935	0	0	0	0	0	0.017209	0	0	0	0	0	0	0	0	0	0	0	0	0	0	0	0	0	0.017209	0	0.051627	0	0	0	0	0	0	0	0.292553	0	0	0	0	0	0	0	0
TCGA-3U-A98F	normal-10A-25eb5eca	0	0	0	0	0	0	0	0	0.0132909	0	0	0	0	0	0	0	0	0	0	0	0	0	0	0	0	0	0	0	0	0	0	0	0.0930363	1.0234	0	0	0	0	0	0	0.0797454	0
TCGA-3U-A98G	diseased-01A-960f3bee	0	0	0.0154041	0	0	0	0	0	0	0	0	0	0	0	0	0	0	0	0	0	0	0	0	0.0154041	0	0	0	0	0	0	0	0	0	0.492932	0	0	0	0	0	0	0.0154041	0
TCGA-3U-A98G	normal-10A-8bf1c207	0	0	0	0	0	0	0	0	0	0	0	0	0	0	0	0	0	0	0	0	0.0137421	0	0	0.0274842	0	0	0	0.0412263	0	0	0	0	0.0412263	0.65962	0	0	0	0	0	0	0.0412263	0
TCGA-3U-A98H	diseased-01A-39f01bb9	0	0	0	0	0	0.0122865	0	0.0122865	0.0122865	0	0	0	0	0	0	0	0	0	0	0	0	0	0	0.0122865	0	0	0	0.0122865	0	0	0	0	0.0737188	0.614323	0.0860052	0	0	0	0	0.0122865	0	0.0122865
TCGA-3U-A98H	normal-10A-0f92be5c	0	0.0148208	0	0	0	0	0	0	0	0	0	0	0	0	0	0	0	0	0	0	0	0	0	0.0148208	0	0	0	0	0	0	0	0	0.0444623	0.844783	0	0	0	0	0	0	0.0296415	0
TCGA-3U-A98I	diseased-01A-29e17685	0	0	0.0140096	0	0	0.0140096	0	0.0280192	0	0	0	0	0	0	0	0	0	0	0	0	0	0	0	0.0140096	0	0.0280192	0	0	0	0	0	0	0.0140096	0.364249	0	0	0	0	0	0	0.0140096	0
TCGA-3U-A98I	normal-10A-3eb0c702	0	0	0.0152406	0.822993	0	0	0	0	0.0304812	0	4.14545	0	0	0	0	0	0	0	0	0	0	0	0	0	0	0	0	0.228609	0.0152406	0.0152406	0	0	5.27325	1.56978	0	0	0.0457219	0	0	0.0457219	47.886	0
TCGA-3U-A98J	diseased-01A-8e3bb5fb	0	0	0	0.0287403	0	0	0	0	0	0	0	0	0	0	0	0	0	0	0	0	0	0	0	0.0143701	0	0.0143701	0	0	0	0	0	0	0	0.416734	0	0	0	0	0	0	0	0
TCGA-3U-A98J	normal-10A-52ca51cc	0	0.0131192	0	7.11062	0	0	0.0655961	0.0393577	0.131192	0	4.40806	0	0	0	0	0	0	0	0	0	0	0	0	0.0393577	0	0	0	0	0.0131192	0	0.0131192	0	4.80164	1.58743	0	0	0.0524769	0	0	0.118073	51.716	0
TCGA-LK-A4NW	diseased-01A-ae7a6be9	0	0	0	0	0	0	0	0	0	0	0	0	0	0	0	0	0	0	0	0	0	0	0	0.0181727	0	0	0	0	0	0	0	0	0.0181727	0	0.0181727	0	0	0	0	0.054518	0	0
TCGA-LK-A4NW	normal-10A-d0cc10b8	0	0	0.0187489	0	0	0	0	0.0374979	0	0	0	0	0	0	0	0	0	0	0	0	0	0	0	0.0374979	0	0	0	0	0	0	0	0	0.0937447	0.0562468	0.0187489	0	0	0	0	0	0	0
TCGA-LK-A4NY	diseased-01A-df8be252	0	0	0	0	0	0	0	0	0.0171604	0	0	0	0	0	0	0	0	0	0	0	0	0	0	0.0171604	0	0	0	0	0	0	0	0	0	0	0	0	0	0	0	0.0343207	0	0
TCGA-LK-A4NY	normal-10A-af40465f	0	0	0	0.0196195	0	0	0	0	0.0196195	0	0	0	0	0	0	0	0	0	0	0	0	0	0	0	0	0	0	0	0	0	0	0	0.0196195	0	0	0	0	0	0	0	0	0
TCGA-LK-A4NZ	diseased-01A-03c7f512	0	0	0	0	0	0	0	0	0	0	0	0	0	0	0	0	0	0	0	0	0	0	0	0	0	0	0	0	0	0	0	0	0.0926559	0	0	0	0	0	0	0.0741248	0	0
TCGA-LK-A4NZ	normal-10A-f2a7b4b9	0	0.0195102	0	0	0	0	0	0	0	0	0	0	0	0	0	0	0	0	0	0	0	0	0	0	0	0	0	0	0	0	0	0	0	0	0	0	0	0	0	0	0	0
TCGA-LK-A4O0	diseased-01A-750d67b2	0	0	0	0	0	0	0	0	0	0	0	0	0	0	0	0	0	0	0	0	0	0	0	0.0181759	0	0	0	0	0	0	0	0	0	0.0363518	0	0	0	0	0	0	0	0
TCGA-LK-A4O0	normal-10A-d7121677	0	0	0.0196821	0	0	0	0	0	0	0	0	0	0	0	0	0	0	0	0	0	0	0	0	0.0590464	0	0	0	0	0	0	0	0	0.0393643	0.0196821	0	0	0	0	0	0.0393643	0.0196821	0
TCGA-LK-A4O2	diseased-01A-185619ac	0	0	0	0	0	0	0	0	0	0	0	0	0	0	0	0	0	0	0	0	0	0	0	0	0	0	0	0	0	0	0	0	0.0183409	0	0	0	0	0	0	0	0	0
TCGA-LK-A4O2	normal-10A-080ce54b	0	0	0	0	0	0	0	0	0.0190443	0	0	0	0	0	0	0	0	0	0	0	0	0	0	0.0190443	0	0	0	0	0	0	0	0	0.285665	0.0190443	0	0	0	0	0	0.552285	0	0
TCGA-LK-A4O5	diseased-01A-ae25c3e1	0	0	0	0	0	0	0	0	0	0	0	0	0	0	0	0	0	0	0	0	0	0	0	0.0361221	0	0	0	0	0	0	0	0	0.144488	0	0	0	0	0	0	0.018061	0	0
TCGA-LK-A4O5	normal-10A-29e2ed2b	0	0	0	0	0	0	0	0	0.0191012	0	0	0	0	0	0	0	0	0	0	0	0	0	0	0	0	0	0	0	0	0	0	0	0.0382024	0	0	0	0	0	0	0	0	0
TCGA-LK-A4O6	diseased-01A-8ef1c699	0	0	0	0	0	0	0	0	0	0	0	0	0	0	0	0	0	0	0	0	0	0	0	0	0	0	0	0	0	0	0	0	0.0352165	0	0.0176083	0	0	0	0	0.0528248	0	0
TCGA-LK-A4O6	normal-10A-e17f476d	0	0	0.0198979	0	0	0	0	0	0	0	0	0	0	0	0	0	0	0	0	0	0	0	0	0.0198979	0	0	0	0	0	0	0	0	0.0795915	0.0198979	0	0	0	0	0	0.119387	0	0
TCGA-LK-A4O7	diseased-01A-7c8cd432	0	0	0	0	0	0	0	0	0	0	0	0	0	0	0	0	0	0	0	0	0	0	0	0	0	0	0	0	0	0	0.0187169	0	0.0187169	0	0.0187169	0	0	0	0	0.0187169	0	0
TCGA-LK-A4O7	normal-10A-997d4490	0	0	0	0	0	0	0	0	0	0	0	0	0	0	0	0	0	0	0	0	0	0	0	0.0188093	0	0	0	0	0	0	0	0	0.0564279	0	0	0	0	0	0	0	0	0
TCGA-MQ-A4KX	diseased-01A-79c5a939	0	0	0	0	0	0	0	0	0	0	0	0	0	0	0	0	0	0	0	0	0	0	0	0.0373836	0	0	0	0	0	0	0	0	0.0186918	0.0186918	0	0	0	0	0	0.0186918	0	0
TCGA-MQ-A4KX	normal-10B-2dd19610	0	0	0	0	0	0	0	0	0.0192576	0	0	0	0	0	0	0	0	0	0	0	0	0	0	0.0385152	0	0	0	0	0	0	0	0	0.0770304	0	0.0385152	0	0	0	0	0	0	0
TCGA-MQ-A4LC	diseased-01A-3ab0369b	0	0	0	0	0	0	0	0	0	0	0	0	0	0	0	0	0	0	0	0	0	0	0	0.0188197	0	0	0	0	0	0	0	0	0.0376394	0	0	0	0	0	0	0	0	0
TCGA-MQ-A4LC	normal-10B-64779cd2	0	0	0	0	0	0	0	0	0	0	0	0	0	0	0	0	0	0	0	0	0	0	0	0.0193772	0	0	0	0	0	0	0	0	0.0581316	0	0	0	0	0	0	0	0	0
TCGA-MQ-A4LJ	diseased-01A-a8435a2f	0	0	0	0	0	0	0	0	0	0	0	0	0	0	0	0	0	0	0	0	0	0	0	0	0	0	0	0	0	0	0	0	0	0	0	0	0	0	0	0	0	0
TCGA-MQ-A4LJ	normal-10B-e5025dec	0	0	0.0164636	0	0	0	0	0	0	0	0	0	0	0	0	0	0	0	0	0	0	0	0	0.0823178	0	0	0	0	0	0	0	0	0.0823178	0	0	0	0	0	0	0.0987813	0	0
TCGA-MQ-A4LM	diseased-01A-1e005282	0	0	0	0	0	0	0	0.0174768	0.0174768	0	0	0	0	0	0	0	0	0	0	0	0	0	0	0.0174768	0	0	0	0	0	0	0	0	0	0	0	0	0	0	0	0	0	0
TCGA-MQ-A4LM	normal-10B-5e27b314	0	0	0	0	0	0	0	0	0	0	0	0	0	0	0	0	0	0	0	0	0	0	0	0.0194351	0	0	0	0	0	0	0	0	0.194351	0.0194351	0	0	0	0	0	0.0583053	0	0
TCGA-MQ-A4LP	diseased-01A-c533e5c1	0	0	0	0	0	0	0	0	0	0	0	0.0167272	0	0	0	0	0	0	0	0	0	0	0	0	0	0	0	0	0	0	0	0	0	0.0167272	0	0	0	0	0	0	0	0
TCGA-MQ-A4LP	normal-10B-4ad016de	0	0	0	0	0	0	0	0	0	0	0	0	0	0	0	0	0	0	0	0	0	0	0	0.0197578	0	0	0	0	0	0	0	0	0.0395156	0	0	0	0	0	0	0	0	0
TCGA-MQ-A4LV	diseased-01A-814172fe	0	0	0	0	0	0	0	0	0	0	0	0	0	0	0	0	0	0	0	0	0	0	0	0.0335509	0	0	0	0	0	0	0	0	0.0167755	0	0	0	0	0	0	0	0	0
TCGA-MQ-A4LV	normal-10B-0538b230	0	0	0	0	0	0	0	0.0409379	0.020469	0	0	0	0	0	0	0	0	0	0	0	0	0	0	0.020469	0	0	0	0	0	0	0	0	0.020469	0	0	0	0	0	0	0.0818758	0	0
TCGA-MQ-A6BL	diseased-01A-17f85887	0	0	0	0	0	0	0	0	0	0	0	0	0	0	0	0	0	0	0	0	0	0	0	0	0	0	0	0	0	0	0	0	0.0371349	0.0185675	0	0	0	0	0	0	0	0
TCGA-MQ-A6BL	normal-10A-15cbf37b	0	0	0	0	0	0	0	0.0215724	0	0	0	0	0	0	0	0	0	0	0	0	0	0	0	0.0215724	0	0	0	0	0	0	0	0	0.0215724	0	0.0215724	0	0	0	0	0	0	0
TCGA-MQ-A6BQ	diseased-01A-1ba4eff8	0	0	0	0	0	0	0	0	0	0	0	0	0	0	0	0	0	0	0	0	0	0	0	0.0178887	0	0	0	0	0	0	0	0	0.0715549	0	0.0357775	0	0	0	0	0.0178887	0	0
TCGA-MQ-A6BQ	normal-10A-270718a1	0	0	0	0	0	0	0	0	0	0	0	0	0	0	0	0	0	0	0	0	0	0	0	0.0185911	0	0	0	0	0	0	0	0	0.0557733	0	0	0	0	0	0	0	0	0
TCGA-MQ-A6BR	diseased-01A-92650010	0	0	0	0	0	0	0	0	0	0	0	0	0	0	0	0	0	0	0	0	0	0	0	0.0171746	0	0	0	0	0	0	0	0	0.103048	0	0	0	0	0	0	0.0686986	0	0
TCGA-MQ-A6BR	normal-10A-cd6fe3b0	0	0	0	0	0	0	0	0	0	0	0	0	0	0	0	0	0	0	0	0	0	0	0	0.0182318	0	0	0	0	0	0	0	0	0.109391	0.0182318	0	0	0	0	0	0	0	0
TCGA-MQ-A6BS	diseased-01A-30f98e21	0	0	0	0	0	0	0	0	0	0	0	0	0	0	0	0	0	0	0	0	0	0	0	0	0	0	0	0	0	0	0	0	0	0	0	0	0	0	0	0	0	0
TCGA-MQ-A6BS	normal-10A-8f4c624c	0	0	0	0	0	0	0	0	0	0	0	0	0	0	0	0	0	0	0	0	0	0	0	0.0185949	0	0	0	0	0	0	0	0	0.0371897	0	0.0185949	0	0	0	0	0.0929743	0	0
TCGA-NQ-A638	diseased-01A-99e00416	0	0	0	0	0	0	0	0	0.0168944	0	0	0	0	0	0	0	0	0	0	0	0	0	0	0.0168944	0	0	0	0	0	0	0	0	0.0506833	0.0168944	0.0168944	0	0	0	0	0	0	0
TCGA-NQ-A638	normal-10A-11a74d0a	0	0	0	0	0	0	0	0	0	0	0	0	0	0	0	0	0	0	0	0	0	0	0	0.0540662	0	0	0	0	0	0	0	0	0.0901103	0	0	0	0	0	0	0	0	0
TCGA-SC-A6LM	diseased-01A-3787ad69	0	0	0	0	0	0	0	0	0.0178096	0	0	0	0	0	0	0	0	0	0	0	0	0	0	0.0178096	0	0	0	0	0	0	0	0	0.0534287	0	0	0	0	0	0	0.0712383	0	0
TCGA-SC-A6LM	normal-10A-19ffc22a	0	0	0	0	0	0	0	0	0	0	0	0	0	0	0	0	0	0	0	0	0	0	0	0.0748336	0	0	0	0	0	0	0	0	0.0187084	0	0.617377	0	0	0	0	0.0374168	0	0
TCGA-SC-A6LN	diseased-01A-19e91b15	0	0	0	0	0	0	0	0	0	0	0	0	0	0	0	0	0	0	0	0	0	0	0	0.0183206	0	0	0	0	0	0	0	0	0.0183206	0	0	0	0	0	0	0.0183206	0	0
TCGA-SC-A6LN	normal-10A-920b5cea	0	0	0	0	0	0	0	0	0.0217394	0	0	0	0	0	0	0	0	0	0	0	0	0	0	0	0	0	0	0	0	0	0	0	0	0	0	0	0	0	0	0.0217394	0	0
TCGA-SC-A6LP	diseased-01A-049603cb	0	0	0	0	0	0	0	0	0	0	0	0	0	0	0	0	0	0	0	0	0	0	0	0	0	0	0	0	0	0	0	0	0.019076	0	0	0	0	0	0	0	0	0
TCGA-SC-A6LP	normal-10A-e84c47d7	0	0.0208124	0	0	0	0	0	0	0	0	0	0	0	0	0	0	0	0	0	0	0	0	0	0	0	0	0	0	0	0	0	0	0	0	0	0	0	0	0	0.0208124	0.0208124	0
TCGA-SC-A6LQ	diseased-01A-22830a7c	0	0	0	0	0	0	0	0	0	0	0	0	0	0	0	0	0	0	0	0	0	0	0	0	0	0	0	0	0	0	0	0	0.0546917	0.0182306	0	0	0	0	0	0.0182306	0	0
TCGA-SC-A6LQ	normal-10A-63b5675b	0	0	0	0	0	0	0	0	0	0	0	0	0	0	0	0	0	0	0	0	0	0	0	0.0387451	0	0	0	0	0	0	0	0	0.0387451	0	0	0	0	0	0	0	0	0
TCGA-SC-A6LR	diseased-01A-a262c630	0	0	0	0	0	0	0	0	0	0	0	0	0	0	0	0	0	0	0	0	0	0	0	0	0	0	0	0	0	0	0	0	0.130371	0	0	0	0	0	0	0.0186245	0	0
TCGA-SC-A6LR	normal-10A-0e94cb72	0	0	0	0	0	0	0	0.0387522	0	0	0	0	0	0	0	0	0	0	0	0	0	0	0	0.0193761	0	0	0	0	0	0	0	0	0.0193761	0	0	0	0	0	0	0.0387522	0	0
TCGA-SC-AA5Z	diseased-01A-d055725b	0	0	0	0	0	0	0	0	0	0	0	0	0	0	0	0	0	0	0	0	0	0	0	0.0428572	0	0	0	0	0	0	0	0	0.0214286	0.535716	0	0	0	0	0	0	0	0
TCGA-SC-AA5Z	normal-10A-d627cf17	0	0	0	0	0	0	0	0	0	0	0	0	0	0	0	0	0	0	0	0	0	0	0.0150939	0.0452818	0	0	0	0.181127	0	0	0	0	0.0603757	0.407536	0	0	0	0	0	0	0	0
TCGA-SH-A7BC	diseased-01A-b5787717	0	0	0	0	0	0	0	0	0.0357556	0	0	0	0	0	0	0	0	0	0	0	0	0	0	0	0	0	0	0	0	0	0	0	0	0	0	0	0	0	0	0	0	0
TCGA-SH-A7BC	normal-10A-8070fbd1	0	0	0	0	0	0	0	0	0	0	0	0	0	0	0	0	0	0	0	0	0	0	0	0.0189037	0	0	0	0	0	0	0	0	0.0189037	0	0	0	0	0.0189037	0	0	0	0
TCGA-SH-A7BD	diseased-01A-5e665f55	0	0	0	0	0	0	0	0	0	0	0	0	0	0	0	0	0	0	0	0	0	0	0	0	0	0	0	0	0	0	0	0	0.0187729	0	0	0	0	0	0	0	0	0
TCGA-SH-A7BD	normal-10A-cb0b1d8f	0	0	0	0	0	0	0	0	0	0	0	0	0	0	0	0	0	0	0	0	0	0	0	0	0	0	0	0	0	0	0	0	0.0565164	0	0	0	0	0	0	0.0376776	0	0
TCGA-SH-A9CT	diseased-01A-33065761	0	0	0	0	0	0	0	0	0	0	0	0	0	0	0	0	0	0	0	0	0	0	0	0	0	0	0	0	0	0	0	0	0.0956802	0.306177	0	0	0	0	0	0	0	0
TCGA-SH-A9CT	normal-10A-7e7d6573	0	0	0	0	0	0	0	0	0.0302679	0	0	0	0	0	0	0	0	0	0	0	0	0	0	0.0302679	0	0	0	0.136206	0	0	0	0	0	1.21072	0	0	0	0	0	0	0	0
TCGA-SH-A9CU	diseased-01A-a9968ec8	0	0	0	0	0	0	0	0	0	0	0.0194552	0	0	0	0	0	0	0	0	0	0	0	0	0.0389105	0	0	0	0	0	0	0	0	0.0194552	0.85603	0	0	0	0	0	0	0	0
TCGA-SH-A9CU	normal-10A-e3d8f7c8	0	0	0	0	0	0	0	0	0	0	0	0	0	0	0	0	0	0	0	0	0	0	0	0.0306478	0	0	0	0	0	0	0	0	0.0153239	1.05735	0.0153239	0	0	0	0	0.0153239	0	0
TCGA-TS-A7OU	diseased-01B-034aaf7d	0	0	0	0	0	0	0	0.0179689	0.0359379	0	0	0	0	0	0	0	0	0	0	0	0	0	0	0	0	0	0	0	0	0	0	0	0.0359379	0.718757	0.0539068	0	0	0	0	0	0.0359379	0
TCGA-TS-A7OU	normal-10A-7feda62f	0	0	0	0	0	0	0	0.0162123	0	0	0	0	0	0	0	0	0	0	0	0	0	0	0	0.0162123	0	0	0	0	0	0	0	0	0.0162123	0.437733	0	0	0	0	0	0	0	0
TCGA-TS-A7OY	diseased-01A-d57d3f99	0	0	0	0	0	0	0	0	0	0	0	0	0	0	0	0	0	0	0	0	0	0	0	0.0176765	0	0	0	0	0	0	0	0	0.0707059	0	0.0176765	0	0	0	0	0	0	0
TCGA-TS-A7OY	normal-10A-dfcd9956	0	0	0	0	0	0	0	0	0	0	0	0	0	0	0	0	0	0	0	0	0	0	0	0	0	0	0	0	0	0	0	0	0.0818775	0	0	0	0	0	0	0.0614081	0	0
TCGA-TS-A7OZ	diseased-01A-a84665cb	0	0	0	0	0	0	0	0	0.0829709	0	0	0	0	0	0	0	0	0	0	0	0	0	0	0.0414854	0	0.0207427	0	0	0	0	0	0	0.0829709	0.311141	0	0	0	0	0	0.0207427	0	0
TCGA-TS-A7OZ	normal-10B-b75f5450	0	0	0	0	0	0	0	0.0159766	0	0	0	0	0	0	0	0	0	0	0	0	0	0	0	0.0479299	0	0	0	0	0	0	0	0	0	0.623089	0	0	0	0	0	0	0	0
TCGA-TS-A7P0	diseased-01A-0b8ecddd	0	0	0	0	0	0	0	0	0.0176081	0	0	0	0	0	0	0	0	0	0	0	0	0	0	0	0	0	0	0	0	0	0	0	0.0352162	0	0	0	0	0	0	0.0176081	0	0
TCGA-TS-A7P0	normal-10A-e596e745	0	0	0	0	0	0	0	0	0.0214794	0	0	0	0	0	0	0	0	0	0	0	0	0	0	0.0429587	0	0	0	0	0	0	0	0	0.0214794	0	0	0	0	0	0	0.0644381	0	0
TCGA-TS-A7P1	diseased-01A-445ab062	0	0	0	0	0	0	0	0	0	0	0	0	0	0	0	0	0	0	0	0	0	0	0	0	0	0	0	0	0	0	0	0	0.0649771	0.584794	0.0162443	0	0	0	0	0	0.0324886	0
TCGA-TS-A7P1	normal-10A-d06f43c8	0	0	0	0	0	0	0	0	0.0153617	0	0	0	0	0	0	0	0	0	0	0	0	0	0	0.09217	0	0	0	0	0	0	0	0	0.0614467	0.875615	0.0153617	0	0	0	0	0	0	0
TCGA-TS-A7P3	diseased-01A-71338acb	0	0	0	0	0	0	0	0	0.0184397	0	0	0	0	0	0	0	0	0	0	0	0	0	0	0	0	0	0	0	0	0	0.0184397	0	0.0553191	0	0	0	0	0	0	0	0	0
TCGA-TS-A7P3	normal-10A-5bf3608f	0	0	0	0	0	0	0	0.0425954	0	0	0	0	0	0.0212977	0	0	0	0	0	0	0	0	0	0	0	0	0	0	0	0	0	0	0.0638931	0	0	0	0	0	0	0	0	0
TCGA-TS-A7P6	diseased-01A-752cca1c	0	0	0	0	0	0	0	0	0	0	0	0	0	0	0	0	0	0	0	0	0	0	0	0	0	0	0	0	0	0	0	0	0.0369429	0	0	0	0	0	0	0	0	0
TCGA-TS-A7P6	normal-10A-98350978	0	0	0	0	0	0	0	0	0.0198406	0	0	0	0	0	0	0	0	0	0	0	0	0	0	0	0	0	0	0	0	0	0	0	0.0396812	0	0.0198406	0	0	0	0	0.0396812	0	0
TCGA-TS-A7P8	diseased-01A-98b2b463	0	0	0	0	0	0	0	0.0181333	0	0	0	0	0	0.0181333	0	0	0	0	0	0	0	0	0	0	0	0	0	0	0	0	0	0	0.0543999	0	0	0	0	0	0	0.0906666	0	0
TCGA-TS-A7P8	normal-10A-638502d4	0	0	0	0	0	0	0	0	0	0	0	0	0	0	0	0	0	0	0	0	0	0	0	0	0	0	0	0	0	0	0	0	0.0175283	0	0	0	0	0	0	0	0	0
TCGA-TS-A7PB	diseased-01A-0c208ef5	0	0	0	0	0	0	0	0.0179814	0	0	0	0	0	0	0	0	0	0	0	0	0	0	0	0	0	0	0	0	0	0	0	0	0	0	0	0	0	0	0	0.0179814	0	0
TCGA-TS-A7PB	normal-10A-fce6e305	0	0	0	0	0	0	0	0	0	0	0	0	0	0	0	0	0	0	0	0	0	0	0	0	0	0	0	0	0	0	0	0	0.0567665	0	0	0	0	0	0	0	0	0
TCGA-TS-A8AI	diseased-01A-1c7b0a74	0	0	0	0	0	0	0	0	0	0	0	0	0	0	0	0	0	0	0	0	0	0	0	0.0439501	0	0.01465	0	0	0	0	0.01465	0	0.0293001	0.571352	0	0	0	0	0	0	0.0439501	0
TCGA-TS-A8AI	normal-10A-a3a91788	0	0	0	0	0	0	0	0	0	0	0	0	0	0	0	0	0	0	0	0	0	0	0	0.0165917	0	0	0	0	0	0	0	0	0	0.680259	0	0	0	0	0	0	0	0
TCGA-TS-A8AS	diseased-01A-24590816	0	0	0	0	0	0	0	0	0	0	0	0	0	0	0	0	0	0	0	0	0	0	0	0.0449113	0	0	0	0.0449113	0	0	0	0	0.0299409	0.389232	0.0299409	0	0	0	0	0	0.0299409	0
TCGA-TS-A8AS	normal-10A-c2aa5ff6	0	0	0	0	0	0	0	0.0335877	0	0	0	0	0	0	0	0	0	0	0	0	0	0	0	0.0503816	0	0	0	0	0	0	0	0	0.0671755	0.587785	0	0	0	0	0	0	0	0
TCGA-TS-A8AV	diseased-01A-09e5069c	0	0	0	0	0	0	0	0	0	0	0	0	0	0	0	0	0	0	0	0	0	0	0	0.0175876	0	0	0	0	0	0	0	0	0.0527628	0.43969	0	0	0	0	0	0	0	0
TCGA-TS-A8AV	normal-10A-1f85a44f	0	0	0	0	0	0	0	0	0.0605704	0	0	0	0	0	0	0	0	0	0	0	0	0	0	0.0121141	0	0	0	0.157483	0	0	0	0	0.0484564	0.642047	0	0	0	0	0	0.0121141	0	0.0242282
TCGA-TS-A8AY	diseased-01A-5aed6ac7	0	0	0	0	0	0	0	0	0	0	0	0	0	0	0	0	0	0	0	0	0	0	0	0.030027	0	0	0	0	0	0	0	0	0.0150135	0.270243	0	0	0	0	0	0	0	0
TCGA-TS-A8AY	normal-10A-91729800	0	0	0	0	0	0	0	0	0.0113711	0	0	0	0	0	0	0	0	0	0	0	0	0	0	0.0568553	0	0	0	0.0568553	0	0	0	0	0.0568553	0.682263	0	0	0	0	0	0	0	0
TCGA-UD-AABZ	diseased-01A-a80c64fa	0	0	0	0	0	0	0	0	0	0	0	0	0	0	0	0	0	0	0	0	0	0	0	0.0161094	0	0	0	0	0	0	0	0	0.0483283	0	0	0	0	0	0	0	0	0
TCGA-UD-AABZ	normal-10A-91484cc1	0	0	0.0142047	0	0	0	0	0	0	0	0	0	0	0	0	0	0	0	0	0	0	0	0	0	0	0	0	0	0	0	0	0	0	0.142047	0	0	0	0	0	0	0	0
TCGA-UD-AAC1	diseased-01A-dc7c704b	0	0	0	0	0	0	0	0	0	0	0	0	0	0	0	0	0	0	0	0	0	0	0	0	0	0	0	0	0	0	0	0	0.0164344	0	0	0	0	0	0	0	0	0
TCGA-UD-AAC1	normal-10A-7e0055d9	0	0.0142462	0.0569847	0	0	0	0	0.0142462	0	0	0	0	0	0	0	0	0	0	0	0	0	0	0	0.0142462	0	0	0	0	0	0	0	0	0.113969	0.0854771	0.0854771	0	0	0	0	0	0	0
TCGA-UD-AAC4	diseased-01A-8552208d	0	0.0283706	0	0	0	0	0	0	0	0	0	0	0	0	0	0	0	0	0	0	0	0	0	0	0	0	0	0	0	0	0	0	1.10645	0	0.0425559	0	0	0	0	0	0	0
TCGA-UD-AAC4	normal-10A-c2373197	0	0	0	0	0	0	0	0.0156229	0	0	0	0	0	0	0	0	0	0	0	0	0	0	0	0.0156229	0	0	0	0	0	0	0	0	0.0156229	0.0312457	0.0156229	0	0	0	0	0	0	0
TCGA-UD-AAC6	diseased-01A-faff5d91	0	0	0	0	0	0	0	0	0	0	0	0	0	0	0	0	0	0	0	0	0	0	0	0.0169659	0	0.0169659	0	0	0	0	0	0	0	0.610773	0.0169659	0	0	0	0	0	0	0
TCGA-UD-AAC6	normal-10A-702adde5	0	0	0.023623	0	0	0	0	0	0	0	0	0	0	0	0	0	0	0	0	0.63782	0	0	0	0	0	0	0	0	0.118115	0	0	0	0.0472459	181.661	0	0	0	0	0	0	0.023623	0
TCGA-UD-AAC7	diseased-01A-b386a8a2	0	0.0315213	0	0	0	0	0	0	0	0	0	0	0	0.0315213	0	0	0	0	0	0	0	0	0	0.0157607	0	0	0	0	0	0	0	0	0.0315213	0.409777	0	0	0	0	0	0	0	0
TCGA-UD-AAC7	normal-10A-e8f11cff	0	0	0	0	0	0	0	0	0	0	0	0	0	0	0	0	0	0	0	0	0	0	0	0.0136006	0	0	0	0	0	0	0	0	0.0272013	0.340016	0	0	0	0	0	0.0136006	0	0
TCGA-UT-A88C	diseased-01B-be2cf850	0	0	0	0	0	0	0	0.0147741	0	0	0	0	0	0	0	0	0	0	0	0	0	0	0	0	0	0	0	0	0	0	0	0	0	0.502318	0	0	0	0	0	0	0	0
TCGA-UT-A88C	normal-10A-b8b4226d	0	0	0	0	0	0	0	0	0	0	0	0	0	0	0	0	0	0	0	0	0	0	0	0.0484888	0	0	0	0	0	0	0	0	0.0121222	0.436399	0	0	0	0	0	0.0121222	0	0
TCGA-UT-A88D	diseased-01B-3c137383	0	0	0	0	0	0	0	0	0	0	0	0	0	0	0	0	0	0	0	0	0	0	0	0.0315637	0	0	0	0	0	0	0.0157818	0	0	0.331419	0.0315637	0	0	0	0	0	0	0
TCGA-UT-A88D	normal-10A-dd3ec567	0	0	0	0	0	0	0	0	0	0	0	0	0	0	0	0	0	0	0	0	0	0	0	0.025198	0	0	0	0	0	0	0	0	0	1.09611	0.025198	0	0	0	0	0	0	0
TCGA-UT-A88E	diseased-01B-e716b620	0	0	0	0	0	0	0	0	0	0	0	0	0	0	0	0	0	0	0	0	0	0	0	0.0167113	0	0	0	0	0	0	0	0	0	0.350937	0	0	0	0	0	0	0	0
TCGA-UT-A88E	normal-10A-4883c389	0	0	0	0	0	0	0	0	0	0	0	0	0	0	0	0	0	0	0	0	0	0	0	0.0508058	0	0	0	0	0	0	0	0	0.0381044	0.533461	0	0	0	0	0	0	0	0
TCGA-UT-A88G	diseased-01B-537baced	0	0	0	0	0	0	0	0	0.0525851	0	0	0	0	0	0	0	0	0	0	0.0175284	0	0	0	0.0175284	0	0	0	0	0	0	0	0	0.0350567	0.403152	0	0	0.0175284	0	0	0	0	0
TCGA-UT-A88G	normal-10A-9e780139	0	0	0	0	0	0	0	0	0.0160117	0	0	0	0	0	0	0	0	0	0	0	0	0	0	0.0320235	0	0	0	0.0960704	0	0	0	0	0.064047	0.784575	0	0	0	0	0	0	0	0
TCGA-UT-A97Y	diseased-01A-19836ac6	0	0	0	0	0	0	0	0.0149107	0	0	0	0	0	0	0	0	0	0	0	0	0	0	0	0.0149107	0	0	0	0	0	0	0	0	0	0.387679	0	0	0	0	0	0	0.0298215	0
TCGA-UT-A97Y	normal-10A-01c5ec1f	0	0	0	0	0	0	0	0	0	0	0	0	0	0	0	0	0	0	0	0	0	0	0	0.0693545	0	0	0	0.0346773	0	0	0	0	0	0.520159	0	0	0	0	0	0.0346773	0	0
TCGA-YS-A95B	diseased-01A-1cff3da7	0	0	0.0149009	0	0	0	0	0	0	0	0	0	0	0	0	0	0	0	0	0	0	0	0	0	0	0.0447026	0	0.0149009	0	0	0	0	0.0149009	0.387422	0	0	0	0	0	0	0	0
TCGA-YS-A95B	normal-10A-31717ccb	0	0	0	0	0	0	0	0	0	0	0	0	0	0	0	0	0	0	0	0	0	0	0	0.0404784	0	0	0	0	0	0	0.0202392	0	0	1.0322	0	0	0	0	0	0	0	0
TCGA-YS-A95C	diseased-01A-50677cb7	0	0	0.0170298	0	0	0	0	0	0	0	0	0	0	0	0	0	0	0	0	0	0	0	0	0.0170298	0	0	0	0	0	0	0	0	0.068119	0.374655	0.0510893	0	0	0	0	0	0	0
TCGA-YS-A95C	normal-10B-594b982a	0	0	0	0	0	0	0	0	0	0	0	0	0	0	0	0	0	0	0	0	0	0	0	0.0157017	0	0	0	0	0	0	0	0	0.125614	4.56921	0.0157017	0	0	0	0	0.0157017	0	0
TCGA-YS-AA4M	diseased-01A-60f4da1c	0	0.0155896	0	0	0	0	0	0	0	0	0	0	0	0	0	0	0	0	0	0	0	0	0	0	0	0	0	0.0311791	0	0	0	0	0.0155896	0.607993	0	0	0	0	0	0	0	0
TCGA-YS-AA4M	normal-10A-5f6c0126	0	0	0.0364906	0	0	0	0	0	0	0	0	0	0	0	0	0	0	0	0	0	0	0	0	0	0	0	0	0	0	0	0.0364906	0	0.0364906	0.851448	0	0	0	0	0	0	0	0
TCGA-ZN-A9VO	diseased-01A-c479717f	0	0	0	0	0	0	0	0	0.013673	0	0	0.013673	0	0	0	0	0	0	0	0	0	0	0	0	0	0	0	0	0	0	0	0	0.0957108	0	0.013673	0	0	0	0	0	0	0
TCGA-ZN-A9VO	normal-10A-d6cb37c3	0	0	0.830732	0	0	0	0	0	0.0156742	0	0	0	0	0	0	0	0	0	0	0	0	0	0	0	0	0	0	0	0	0	0	0	0.109719	0	0.0156742	0	0	0	0	0	0	0
TCGA-ZN-A9VP	diseased-01A-7b142c33	0	0	0	0	0	0	0	0	0.0264004	0	0	0	0	0	0	0	0	0	0	0	0	0	0	0	0	0	0	0	0	0	0	0	0.0264004	0.831612	0	0	0	0	0	0	0.0132002	0
TCGA-ZN-A9VP	normal-10A-0767ae45	0	0	1.19048	0	0	0	0	0	0	0	0	0	0	0	0	0	0	0	0	0	0	0	0	0.0547347	0	0	0	0	0	0	0	0	0.0547347	1.09469	0.041051	0	0	0	0	0	0	0
TCGA-ZN-A9VQ	diseased-01A-6ee244d3	0	0	0.0155279	0	0.0155279	0	0	0.0155279	0	0	0	0	0	0	0	0	0	0	0	0	0	0	0	0	0	0	0	0	0	0	0	0	0	0.263974	0	0	0	0	0	0	0	0
TCGA-ZN-A9VQ	normal-10A-ba68fad1	0	0	1.88366	0	0	0	0	0	0	0	0	0	0	0	0	0	0	0	0	0	0	0	0	0.0348826	0	0	0	0	0	0	0	0	0	0.645328	0	0	0	0	0.0348826	0	0	0
TCGA-ZN-A9VS	diseased-01A-8a6c3d27	0	0	0	0	0	0	0	0	0.00685403	0	0	0	0	0	0	0	0	0	0	0	0	0	0	0	0	0	0	0	0	0	0	0	0.164497	0.795067	0.00685403	0	0	0	0	0	0	0
TCGA-ZN-A9VS	normal-10A-4b51f696	0	0	4.10934	0	0	0	0	0	0.073947	0	0	0	0	0	0	0	0	0	0	0	0	0	0	0.0211277	0	0	0	0.116202	0	0	0	0	0.0316916	2.07052	0.0422555	0	0	0	0	0	0	0.0105639
TCGA-ZN-A9VU	diseased-01A-90cf2158	0	0	0	0	0	0	0	0	0.0183658	0	0	0	0	0	0	0	0	0	0	0	0	0	0	0.00918288	0	0.0275486	0	0	0	0	0	0	0	0.651984	0.0183658	0	0	0	0	0	0	0
TCGA-ZN-A9VU	normal-10A-f1708104	0	0	15.8847	0	0	0	0	0.00845832	0.025375	0	0	0	0	0	0	0	0	0.00845832	0	0.355249	0	0	0	0.025375	0	0	0	0.0761249	0.0338333	0	0	0	0.363708	48.8045	0.0761249	0	0	0	0	0.0169166	0	0
TCGA-ZN-A9VV	diseased-01A-a79198a1	0	0	0	0	0	0	0	0	0.0169999	0	0	0	0	0	0	0	0	0	0	0	0	0	0	0.00849995	0	0.0169999	0	0.00849995	0	0	0	0	0.0169999	0.569497	0	0	0	0	0.00849995	0	0.0169999	0
TCGA-ZN-A9VV	normal-10A-710618ee	0	0	5.04935	0	0	0	0	0.0113724	0	0	0	0	0	0	0	0	0	0	0	0	0	0	0	0	0	0	0	0	0	0	0	0	0.0682344	1.03489	0.0682344	0	0	0	0	0	0	0
TCGA-ZN-A9VW	diseased-01A-3b13036e	0	0.00838103	0.00838103	0	0	0	0	0	0.0167621	0	0	0	0	0.00838103	0	0	0	0	0	0	0	0	0	0.0335241	0	0.0251431	0	0	0	0	0	0	0	0.477719	0.00838103	0	0	0	0	0	0	0
TCGA-ZN-A9VW	normal-10A-fe9ac8d1	0	0	0.568587	0	0	0	0	0	0	0	0	0	0	0	0	0	0	0	0	1.02346	0	0	0	0.0284294	0	0	0	0	0.113717	0	0	0	0.142147	67.5766	0	0	0	0	0	0.0284294	0	0
